# Supplementary material for: Y(OTf)3-catalyzed phosphorylation of 2H-chromene hemiacetals with P(O)–H compounds to 2-phosphorylated 2H-chromenes
Source: Royal Society of Chemistry journal article supplement (doi:10.1039/d1ob01221e), 2021-01-01

# **Y(OTf)<sub>3</sub>-catalyzed Phosphorylation of 2*H*-Chromene Hemiacetals with P(O)-H compounds to 2-Phosphorylated 2*H*-Chromenes**

**Shi-Lu Zheng,<sup>a</sup> Yun-Xiang Zou,<sup>a</sup> Zhong Wen,<sup>a</sup> Jia-Fu Lin,<sup>a</sup> Ling-Hui Gu<sup>\*a</sup> and Long Chen<sup>\*a</sup>**

<sup>a</sup> Antibiotics Research and Re-evaluation Key Laboratory of Sichuan Province, Sichuan Industrial Institute of Antibiotics, School of Pharmacy, Chengdu University, 2025 Chengluo Avenue, Chengdu 610016, P. R. China

E-mail: chenlong@cdu.edu.cn

| <b>Table of Contents</b>                                                                                                                                      | <b>Page</b>   |
|---------------------------------------------------------------------------------------------------------------------------------------------------------------|---------------|
| <b>1. General information</b>                                                                                                                                 | <b>2</b>      |
| <b>2. General procedure for the dehydrative phosphorylation of 2<i>H</i>-chromene hemiacetals with P(O)-H species to 2-phosphorylated 2<i>H</i>-chromenes</b> | <b>3-14</b>   |
| <b>3. Gram-scale synthesis and product elaboration</b>                                                                                                        | <b>15-16</b>  |
| <b>4. X-ray Crystallographic Data of 3ca</b>                                                                                                                  | <b>17-18</b>  |
| <b>5. <sup>1</sup>H, <sup>13</sup>C, <sup>19</sup>F and <sup>31</sup>P NMR spectra</b>                                                                        | <b>19-112</b> |

## 1. General information:

Reactions were monitored by thin layer chromatography using UV light to visualize the reaction course. Purification of reaction products were carried out by flash chromatography on silica gel H. Chemical yields refer to pure isolated substances.  $^1\text{H}$  and  $^{13}\text{C}$  NMR spectra were obtained using a Bruker DPX-600 or DPX-400 spectrometer. The  $^{31}\text{P}$  NMR spectra was recorded at JEOL 243 MHz with 85%  $\text{H}_3\text{PO}_4$  as external standard. The  $^{19}\text{F}$  NMR spectra was recorded at JEOL 565 MHz. HRMS data were collected on a on a Thermo Scientific LTQ Orbitrap Discovery (Bremen, Germany). The linear ion trap (LTQ) part of the hybrid MS system was equipped with electrospray ionization (ESI) probe and operated in both positive and negative ion modes. Chemical shifts are reported in ppm from tetramethylsilane with the solvent resonance as the internal standard. The following abbreviations were used to designate chemical shift multiplicities: s = singlet, d = doublet, t = triplet, q = quartet, h = heptet, m = multiplet, br = broad.

All reactions were run under an atmosphere of air. Anhydrous THF and toluene were prepared by distillation over sodium-benzophenone ketyl prior to use. Anhydrous acetone was distilled over anhydrous  $\text{CaSO}_4$  and stored over MS 4Å. Anhydrous halogenated solvents and  $\text{CH}_3\text{CN}$  were prepared by first distillation over  $\text{P}_2\text{O}_5$  and then from  $\text{CaH}_2$ . Anhydrous ethyl acetate was prepared by first dried in anhydrous  $\text{Na}_2\text{SO}_4$  and then distilled over  $\text{P}_2\text{O}_5$  and stored over MS 4Å. Anhydrous  $\text{CH}_3\text{NO}_2$  was prepared by first dried in anhydrous  $\text{Na}_2\text{SO}_4$  and then distilled under reduced pressure. 2*H*-chromene hemiacetals **1** were prepared according to the literature report.<sup>1</sup>  $\text{Y}(\text{OTf})_3$  (99.998%) was purchased from Alfa-Aesar and used as received.

---

<sup>1</sup> Y.-C. Wu, H.-J. Li, L. Liu, N. Demoulin, Z. Liu, D. Wang and Y.-J. Chen, *Adv. Synth. Catal.*, 2011, **353**, 907.

## 2. General procedure for the dehydrative phosphorylation of 2*H*-chromene hemiacetals with P(O)-H species to 2-phosphorylated 2*H*-chromenes

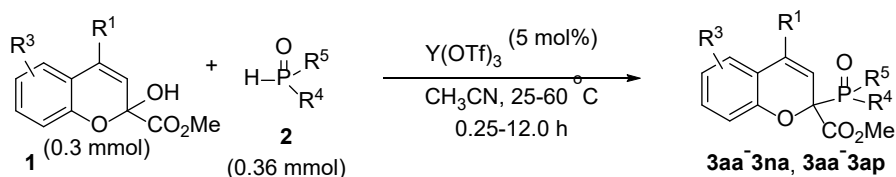

The reaction was carried out under an air atmosphere. To a 10-mL vial were added 2*H*-chromene hemiacetals **1** (0.3 mmol, 1.0 equiv),  $R^4R^5P(O)H$  **2** (0.36 mmol, 1.2 equivs) and 3.0 mL of anhydrous  $CH_3CN$ . After adding  $Y(OTf)_3$  (8.0 mg, 5 mol%), the reaction mixture was stirred at indicated temperature till almost full conversion of **1** by TLC analysis. The reaction mixture was directly subjected to column chromatography using dichloromethane/ethyl acetate (generally 40:1 to 20:1, v:v) as the eluent to afford the desired products **3**.

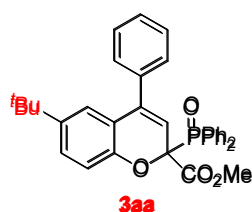

Column chromatography afforded the desired product **3aa** in 91% yield (142.7 mg) as white solid; Mp: 113-115 °C;  $^1H$  NMR (600 MHz,  $CDCl_3$ ):  $\delta$  = 8.20-8.17 (m, 2H), 7.82-7.79 (m, 2H), 7.62-7.60 (m, 1H), 7.57-7.55 (m, 2H), 7.42-7.38 (m, 3H), 7.33-7.30 (m, 3H), 7.24-7.22 (m, 2H), 7.06 (d,  $J$  = 8.4 Hz, 1H), 6.81-6.77 (m, 2H), 6.28 (d,  $J$  = 4.8 Hz, 1H), 3.60 (s, 3H), 1.12 (s, 9H);  $^{13}C\{^1H\}$  NMR (150 MHz,  $CDCl_3$ ):  $\delta$  = 168.0 (d,  $J_{C-P}$  = 4.5 Hz), 150.0 (d,  $J_{C-P}$  = 4.5 Hz), 144.3, 138.8 (d,  $J_{C-P}$  = 7.5 Hz), 137.0, 132.7 (d,  $J_{C-P}$  = 9.0 Hz), 132.6, 132.2 (d,  $J_{C-P}$  = 9.0 Hz), 129.8 (d,  $J_{C-P}$  = 100.5 Hz), 128.6 (d,  $J_{C-P}$  = 94.5 Hz), 128.5 (d,  $J_{C-P}$  = 16.5 Hz), 128.3, 127.9 (d,  $J_{C-P}$  = 12.0 Hz), 126.9, 122.9, 119.4, 116.4 (d,  $J_{C-P}$  = 3.0 Hz), 115.6, 84.6 (d,  $J_{C-P}$  = 76.5 Hz), 53.0, 34.1, 31.2;  $^{31}P\{^1H\}$  NMR (243 MHz,  $CDCl_3$ ):  $\delta$  = 28.7; HRMS (ESI): Exact mass calcd for  $C_{33}H_{31}O_4P$   $[M+Na]^+$ : 545.1852, Found: 545.1848.

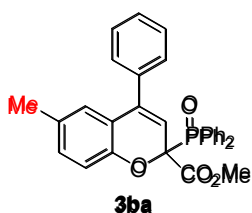

Column chromatography afforded the desired product **3ba** in 96% yield (138.4 mg) as white solid; Mp: 139-141 °C;  $^1H$  NMR (600 MHz,  $CDCl_3$ ):  $\delta$  = 8.05-8.02 (m, 2H), 7.70-7.67 (m, 2H), 7.49-7.47 (m, 1H), 7.44-7.41 (m, 2H), 7.29-7.27 (m, 1H), 7.25-7.22 (m, 2H), 7.15-7.13 (m, 5H), 6.73-6.72 (m, 1H), 6.64-6.63 (m, 1H), 6.46 (s, 1H), 6.14 (d,  $J$  = 5.4 Hz, 1H), 3.46 (s, 3H), 1.94 (s, 3H);  $^{13}C\{^1H\}$  NMR (150 MHz,  $CDCl_3$ ):  $\delta$  = 168.1 (d,  $J_{C-P}$  = 4.5 Hz), 150.0 (d,  $J_{C-P}$  = 6.0 Hz), 138.3 (d,  $J_{C-P}$  = 7.5 Hz), 137.0,

132.6 (d,  $J_{C-P} = 9.0$  Hz), 132.55 (d,  $J_{C-P} = 1.5$  Hz), 132.2 (d,  $J_{C-P} = 9.0$  Hz), 132.1 (d,  $J_{C-P} = 3.0$  Hz), 131.0, 130.4, 129.7 (d,  $J_{C-P} = 100.5$  Hz), 128.5 (d,  $J_{C-P} = 3.0$  Hz), 128.45 (d,  $J_{C-P} = 94.5$  Hz), 128.4, 128.2, 127.9 (d,  $J_{C-P} = 12.0$  Hz), 126.2, 119.8, 116.5 (d,  $J_{C-P} = 4.5$  Hz), 115.9, 84.4 (d,  $J_{C-P} = 78.0$  Hz), 53.0, 20.5;  $^{31}\text{P}\{^1\text{H}\}$  NMR (243 MHz,  $\text{CDCl}_3$ ):  $\delta = 28.4$ ; HRMS (ESI): Exact mass calcd for  $\text{C}_{30}\text{H}_{25}\text{O}_4\text{P}$   $[\text{M}+\text{Na}]^+$ : 503.1383, Found: 503.1380.

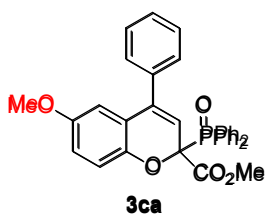

Column chromatography afforded **3ca** in 91% yield (135.5 mg) as white solid;

Mp: 48-50 °C;  $^1\text{H}$  NMR (600 MHz,  $\text{CDCl}_3$ ):  $\delta = 8.06$ -8.03 (m, 2H), 7.72-7.68 (m, 2H), 7.51-7.48 (m, 1H), 7.46-7.42 (m, 2H), 7.29-7.26 (m, 2H), 7.25-7.24 (m, 1H), 7.18-7.14 (m, 5H), 6.68 (d,  $J = 8.4$  Hz, 1H), 6.49 (dd,  $J = 8.4$  Hz, 3.0 Hz, 1H),

6.25 (d,  $J = 3.0$  Hz, 1H), 6.20 (d,  $J = 5.4$  Hz, 1H), 3.48 (s, 3H), 3.46 (s, 3H);  $^{13}\text{C}\{^1\text{H}\}$  NMR (150 MHz,  $\text{CDCl}_3$ ):  $\delta = 168.0$  (d,  $J_{C-P} = 4.5$  Hz), 154.1, 146.0 (d,  $J_{C-P} = 4.5$  Hz), 138.2 (d,  $J_{C-P} = 9.0$  Hz), 136.7, 132.6 (d,  $J_{C-P} = 9.0$  Hz), 132.2 (d,  $J_{C-P} = 9.0$  Hz), 129.8 (d,  $J_{C-P} = 100.5$  Hz), 128.45 (d,  $J_{C-P} = 6.0$  Hz), 128.44, 128.42 (d,  $J_{C-P} = 94.5$  Hz), 128.3, 127.9 (d,  $J_{C-P} = 12.0$  Hz), 120.8 (d,  $J_{C-P} = 3.0$  Hz), 117.4 (d,  $J_{C-P} = 4.5$  Hz), 116.7, 114.8, 111.7, 84.4 (d,  $J_{C-P} = 78.0$  Hz), 55.6, 53.0;  $^{31}\text{P}\{^1\text{H}\}$  NMR (243 MHz,  $\text{CDCl}_3$ ):  $\delta = 28.4$ ; HRMS (ESI): Exact mass calcd for  $\text{C}_{30}\text{H}_{25}\text{O}_5\text{P}$   $[\text{M}+\text{Na}]^+$ : 519.1332, Found: 519.1330.

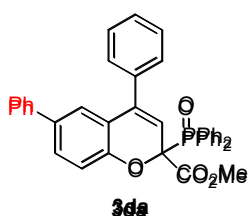

Column chromatography afforded **3da** in 88% yield (143.2 mg) as white solid;

Mp: 65-67 °C;  $^1\text{H}$  NMR (600 MHz,  $\text{CDCl}_3$ ):  $\delta = 8.16$ -8.13 (m, 2H), 7.80-7.76 (m, 2H), 7.59-7.57 (m, 1H), 7.54-7.51 (m, 2H), 7.37-7.32 (m, 3H), 7.30-7.27 (m, 4H), 7.26-7.25 (m, 2H), 7.22-7.18 (m, 5H), 6.95 (d,  $J = 1.8$  Hz, 1H), 6.88 (d,  $J = 8.4$  Hz, 1H), 6.28 (d,  $J = 4.8$  Hz, 1H), 3.57 (s, 3H);  $^{13}\text{C}\{^1\text{H}\}$  NMR (150 MHz,  $\text{CDCl}_3$ ):

$\delta = 167.9$  (d,  $J_{C-P} = 4.5$  Hz), 151.7 (d,  $J_{C-P} = 6.0$  Hz), 140.4, 138.4 (d,  $J_{C-P} = 7.5$  Hz), 136.7, 134.9, 132.7 (d,  $J_{C-P} = 9.0$  Hz), 132.66, 132.2 (d,  $J_{C-P} = 3.0$  Hz), 132.1 (d,  $J_{C-P} = 9.0$  Hz), 129.6 (d,  $J_{C-P} = 100.5$  Hz), 128.6, 128.54 (d,  $J_{C-P} = 45.0$  Hz), 128.50 (d,  $J_{C-P} = 10.5$  Hz), 128.0 (d,  $J_{C-P} = 12.0$  Hz), 126.9, 126.6, 124.5, 120.2, 116.9 (d,  $J_{C-P} = 4.5$  Hz), 116.5, 84.8 (d,  $J_{C-P} = 76.5$  Hz), 53.1;  $^{31}\text{P}\{^1\text{H}\}$  NMR (243 MHz,  $\text{CDCl}_3$ ):  $\delta = 28.3$ ; HRMS (ESI): Exact mass calcd for  $\text{C}_{35}\text{H}_{27}\text{O}_4\text{P}$   $[\text{M}+\text{Na}]^+$ : 565.1539, Found: 565.1537.



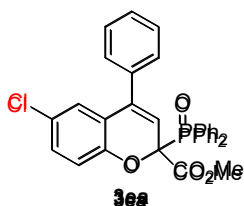

Column chromatography afforded the desired product **3ea** in 63% yield (94.7 mg) as white solid; Mp: 122-124 °C;  $^1\text{H}$  NMR (600 MHz,  $\text{CDCl}_3$ ):  $\delta$  = 8.17-8.14 (m, 2H), 7.82-7.79 (m, 2H), 7.64-7.62 (m, 1H), 7.59-7.56 (m, 2H), 7.43-7.38 (m, 4H), 7.30-7.26 (m, 4H), 6.99 (dd,  $J$  = 9.0 Hz, 2.4 Hz, 1H), 6.78 (d,  $J$  = 8.4 Hz, 1H), 6.75 (d,  $J$  = 2.4 Hz, 1H), 6.32 (d,  $J$  = 4.8 Hz, 1H), 3.60 (s, 3H);  $^{13}\text{C}\{^1\text{H}\}$  NMR (150 MHz,  $\text{CDCl}_3$ ):  $\delta$  = 167.6 (d,  $J_{\text{C-P}}$  = 4.5 Hz), 150.6 (d,  $J_{\text{C-P}}$  = 4.5 Hz), 137.4 (d,  $J_{\text{C-P}}$  = 7.5 Hz), 136.1, 132.8 (d,  $J_{\text{C-P}}$  = 3.0 Hz), 132.6 (d,  $J_{\text{C-P}}$  = 9.0 Hz), 132.4 (d,  $J_{\text{C-P}}$  = 3.0 Hz), 132.1 (d,  $J_{\text{C-P}}$  = 9.0 Hz), 129.6, 129.4 (d,  $J_{\text{C-P}}$  = 100.5 Hz), 128.7, 128.6 (d,  $J_{\text{C-P}}$  = 3.0 Hz), 128.5, 128.4 (d,  $J_{\text{C-P}}$  = 1.5 Hz), 128.1 (d,  $J_{\text{C-P}}$  = 94.5 Hz), 128.0 (d,  $J_{\text{C-P}}$  = 12.0 Hz), 126.7, 125.5, 121.4 (d,  $J_{\text{C-P}}$  = 1.5 Hz), 117.7 (d,  $J_{\text{C-P}}$  = 3.0 Hz), 117.4, 84.9 (d,  $J_{\text{C-P}}$  = 76.5 Hz), 53.2;  $^{31}\text{P}\{^1\text{H}\}$  NMR (243 MHz,  $\text{CDCl}_3$ ):  $\delta$  = 28.3; HRMS (ESI): Exact mass calcd for  $\text{C}_{29}\text{H}_{22}\text{ClO}_4\text{P}$   $[\text{M}+\text{Na}]^+$ : 523.0836, Found: 523.0837.

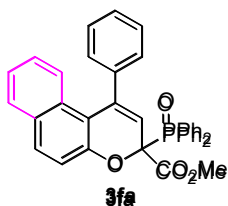

Column chromatography afforded the desired product **3fa** in 61% yield (94.4 mg) as yellow solid; Mp: 164-166 °C;  $^1\text{H}$  NMR (600 MHz,  $\text{CDCl}_3$ ):  $\delta$  = 8.18-8.15 (m, 2H), 7.81-7.78 (m, 2H), 7.68-7.63 (m, 2H), 7.62-7.59 (m, 1H), 7.57-7.54 (m, 2H), 7.37-7.32 (m, 3H), 7.26-7.25 (m, 1H), 7.24-7.17 (m, 6H), 6.99-6.96 (m, 1H), 6.91-6.90 (m, 1H), 6.45 (d,  $J$  = 7.8 Hz, 1H), 3.55 (s, 3H);  $^{13}\text{C}\{^1\text{H}\}$  NMR (150 MHz,  $\text{CDCl}_3$ ):  $\delta$  = 167.9 (d,  $J_{\text{C-P}}$  = 3.0 Hz), 152.6 (d,  $J_{\text{C-P}}$  = 9.0 Hz), 140.3, 138.8 (d,  $J_{\text{C-P}}$  = 9.0 Hz), 132.6 (d,  $J_{\text{C-P}}$  = 3.0 Hz), 132.5 (d,  $J_{\text{C-P}}$  = 9.0 Hz), 132.2 (d,  $J_{\text{C-P}}$  = 9.0 Hz), 131.9 (d,  $J_{\text{C-P}}$  = 1.5 Hz), 131.4, 130.7, 130.2, 129.5, 128.5 (d,  $J_{\text{C-P}}$  = 9.0 Hz), 128.4 (d,  $J_{\text{C-P}}$  = 96.0 Hz), 128.3 (d,  $J_{\text{C-P}}$  = 10.5 Hz), 128.0 (d,  $J_{\text{C-P}}$  = 12.0 Hz), 127.9, 127.7, 126.3, 125.3, 123.6, 118.6, 117.6, 115.1, 83.3 (d,  $J_{\text{C-P}}$  = 78.0 Hz), 53.0;  $^{31}\text{P}\{^1\text{H}\}$  NMR (243 MHz,  $\text{CDCl}_3$ ):  $\delta$  = 28.7; HRMS (ESI): Exact mass calcd for  $\text{C}_{33}\text{H}_{25}\text{O}_4\text{P}$   $[\text{M}-\text{H}]^-$ : 515.1418, Found: 515.1421.

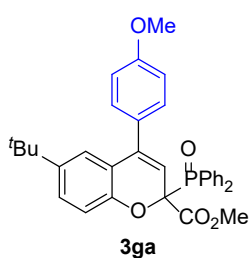

Column chromatography afforded the product **3ga** in 79% yield (131.0 mg) as white solid; Mp: 52-54 °C;  $^1\text{H}$  NMR (600 MHz,  $\text{CDCl}_3$ ):  $\delta$  = 8.19-8.16 (m, 2H), 7.80-7.77 (m, 2H), 7.62-7.60 (m, 1H), 7.57-7.54 (m, 2H), 7.32-7.26 (m, 3H), 7.23-7.20 (m, 2H), 7.05 (dd,  $J$  = 8.4 Hz, 2.4 Hz, 1H), 6.95-6.93 (m, 2H), 6.84 (d,  $J$  = 2.4 Hz, 1H), 6.77 (d,  $J$  = 9.0 Hz, 1H), 6.24 (d,  $J$  = 5.4 Hz, 1H), 3.86 (s, 3H), 3.59 (s, 3H), 1.12 (s, 9H);  $^{13}\text{C}\{^1\text{H}\}$  NMR (150 MHz,  $\text{CDCl}_3$ ):  $\delta$  = 168.0 (d,  $J_{\text{C-P}}$  = 6.0 Hz), 159.6, 150.0 (d,  $J_{\text{C-P}}$  = 6.0 Hz), 144.2, 138.3 (d,  $J_{\text{C-P}}$  = 9.0 Hz), 132.6 (d,  $J_{\text{C-P}}$  = 9.0 Hz), 132.5 (d,  $J_{\text{C-P}}$  = 3.0 Hz), 132.2

(d,  $J_{C-P} = 9.0$  Hz), 132.1 (d,  $J_{C-P} = 3.0$  Hz), 129.8 (d,  $J_{C-P} = 99.0$  Hz), 129.7, 129.3, 128.5 (d,  $J_{C-P} = 94.5$  Hz), 128.4 (d,  $J_{C-P} = 12.0$  Hz), 127.8 (d,  $J_{C-P} = 12.0$  Hz), 126.7, 122.9, 119.5 (d,  $J_{C-P} = 3.0$  Hz), 115.5 (d,  $J_{C-P} = 3.0$  Hz), 115.4, 113.8, 84.5 (d,  $J_{C-P} = 76.5$  Hz), 55.3, 53.0, 34.1, 31.2;  $^{31}\text{P}\{^1\text{H}\}$  NMR (243 MHz,  $\text{CDCl}_3$ ):  $\delta = 28.1$ ; HRMS (ESI): Exact mass calcd for  $\text{C}_{34}\text{H}_{33}\text{O}_5\text{P}$   $[\text{M}+\text{Na}]^+$ : 575.1958, Found: 575.1958.

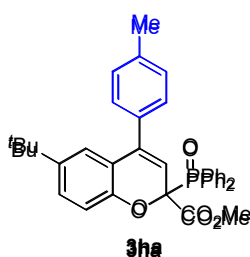

Column chromatography afforded product **3ha** in 95% yield (152.9 mg) as white solid; Mp: 52-54 °C;  $^1\text{H}$  NMR (600 MHz,  $\text{CDCl}_3$ ):  $\delta = 8.20$ -8.17 (m, 2H), 7.80-7.77 (m, 2H), 7.62-7.60 (m, 1H), 7.57-7.55 (m, 2H), 7.31-7.29 (m, 1H), 7.24-7.21 (m, 6H), 7.05 (d,  $J = 8.4$  Hz, 1H), 6.85 (s, 1H), 6.77 (d,  $J = 8.4$  Hz, 1H), 6.26 (d,  $J = 5.4$  Hz, 1H), 3.59 (s, 3H), 2.40 (s, 3H), 1.12 (s, 9H);  $^{13}\text{C}\{^1\text{H}\}$  NMR

(150 MHz,  $\text{CDCl}_3$ ):  $\delta = 168.0$  (d,  $J_{C-P} = 6.0$  Hz), 150.0 (d,  $J_{C-P} = 6.0$  Hz), 144.2, 138.7 (d,  $J_{C-P} = 7.5$  Hz), 138.1, 134.0, 132.6 (d,  $J_{C-P} = 9.0$  Hz), 132.5 (d,  $J_{C-P} = 3.0$  Hz), 132.2 (d,  $J_{C-P} = 9.0$  Hz), 132.1 (d,  $J_{C-P} = 3.0$  Hz), 129.8 (d,  $J_{C-P} = 100.5$  Hz), 129.1, 128.5 (d,  $J_{C-P} = 94.5$  Hz), 128.46, 128.4, 127.8 (d,  $J_{C-P} = 12.0$  Hz), 126.7, 122.9, 119.4, 115.8 (d,  $J_{C-P} = 3.0$  Hz), 115.5, 84.5 (d,  $J_{C-P} = 78.0$  Hz), 53.0, 34.1, 31.2, 21.2;  $^{31}\text{P}\{^1\text{H}\}$  NMR (243 MHz,  $\text{CDCl}_3$ ):  $\delta = 28.1$ ; HRMS (ESI): Exact mass calcd for  $\text{C}_{34}\text{H}_{33}\text{O}_4\text{P}$   $[\text{M}+\text{Na}]^+$ : 559.2009, Found: 559.2012.

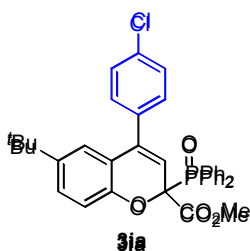

Column chromatography afforded the desired product **3ia** in 90% yield (150.4 mg) as white solid; Mp: 53-55 °C;  $^1\text{H}$  NMR (600 MHz,  $\text{CDCl}_3$ ):  $\delta = 8.19$ -8.16 (m, 2H), 7.80-7.77 (m, 2H), 7.64-7.61 (m, 1H), 7.58-7.55 (m, 2H), 7.40-7.38 (m, 2H), 7.34-7.31 (m, 1H), 7.27-7.22 (m, 4H), 7.08 (dd,  $J = 8.4$  Hz, 2.4 Hz, 1H), 6.79 (d,  $J = 9.0$  Hz, 1H), 6.75 (d,  $J = 2.4$  Hz, 1H), 6.28 (d,  $J = 5.4$  Hz, 1H), 3.60 (s, 3H),

1.13 (s, 9H);  $^{13}\text{C}\{^1\text{H}\}$  NMR (150 MHz,  $\text{CDCl}_3$ ):  $\delta = 167.8$  (d,  $J_{C-P} = 4.5$  Hz), 149.9 (d,  $J_{C-P} = 6.0$  Hz), 144.4, 137.7 (d,  $J_{C-P} = 9.0$  Hz), 135.4, 134.2, 132.61 (d,  $J_{C-P} = 1.5$  Hz), 132.60 (d,  $J_{C-P} = 9.0$  Hz), 132.2 (d,  $J_{C-P} = 3.0$  Hz), 132.1 (d,  $J_{C-P} = 9.0$  Hz), 129.8 (d,  $J_{C-P} = 1.5$  Hz), 129.7 (d,  $J_{C-P} = 100.5$  Hz), 128.6, 128.5 (d,  $J_{C-P} = 12.0$  Hz), 128.3 (d,  $J_{C-P} = 94.5$  Hz), 127.9 (d,  $J_{C-P} = 12.0$  Hz), 127.1, 122.5, 119.0 (d,  $J_{C-P} = 3.0$  Hz), 116.8 (d,  $J_{C-P} = 3.0$  Hz), 115.7, 84.4 (d,  $J_{C-P} = 76.5$  Hz), 53.0, 34.1, 31.2;  $^{31}\text{P}\{^1\text{H}\}$  NMR (243 MHz,  $\text{CDCl}_3$ ):  $\delta = 28.1$ ; HRMS (ESI): Exact mass calcd for  $\text{C}_{33}\text{H}_{30}\text{ClO}_4\text{P}$   $[\text{M}+\text{Na}]^+$ : 579.1462, Found: 579.1464.

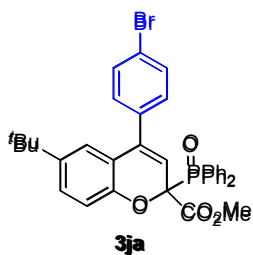

Column chromatography afforded the desired product **3ja** in 92% yield (166.0 mg) as white solid; Mp: 56-58 °C;  $^1\text{H}$  NMR (600 MHz,  $\text{CDCl}_3$ ):  $\delta$  = 8.18-8.15 (m, 2H), 7.80-7.76 (m, 2H), 7.63-7.61 (m, 1H), 7.58-7.53 (m, 4H), 7.33-7.30 (m, 1H), 7.24-7.19 (m, 4H), 7.07 (d,  $J$  = 8.4 Hz, 1H), 6.79 (d,  $J$  = 8.4 Hz, 1H), 6.74 (s, 1H), 6.28 (d,  $J$  = 5.4 Hz, 1H), 3.59 (s, 3H), 1.12 (s, 9H);  $^{13}\text{C}\{^1\text{H}\}$  NMR (150 MHz,  $\text{CDCl}_3$ ):  $\delta$  = 167.8 (d,  $J_{\text{C-P}}$  = 4.5 Hz), 149.9 (d,  $J_{\text{C-P}}$  = 4.5 Hz), 144.5, 137.7 (d,  $J_{\text{C-P}}$  = 7.5 Hz), 135.9, 132.61, 132.60 (d,  $J_{\text{C-P}}$  = 7.5 Hz), 132.2 (d,  $J_{\text{C-P}}$  = 3.0 Hz), 132.1 (d,  $J_{\text{C-P}}$  = 9.0 Hz), 131.6, 130.1, 129.7 (d,  $J_{\text{C-P}}$  = 100.5 Hz), 128.5 (d,  $J_{\text{C-P}}$  = 12.0 Hz), 128.3 (d,  $J_{\text{C-P}}$  = 94.5 Hz), 127.9 (d,  $J_{\text{C-P}}$  = 12.0 Hz), 127.1, 122.6, 122.4, 118.9 (d,  $J_{\text{C-P}}$  = 1.5 Hz), 116.8 (d,  $J_{\text{C-P}}$  = 3.0 Hz), 115.7, 84.4 (d,  $J_{\text{C-P}}$  = 76.5 Hz), 53.1, 34.1, 31.2;  $^{31}\text{P}\{^1\text{H}\}$  NMR (243 MHz,  $\text{CDCl}_3$ ):  $\delta$  = 28.1; HRMS (ESI): Exact mass calcd for  $\text{C}_{33}\text{H}_{30}\text{BrO}_4\text{P}$   $[\text{M}+\text{Na}]^+$ : 623.0957, Found: 623.0953.

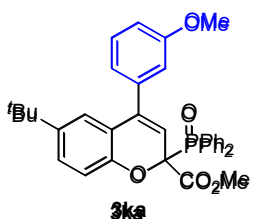

Column chromatography afforded the desired product **3ka** in 73% yield (121.0 mg) as white solid; Mp: 132-134 °C;  $^1\text{H}$  NMR (600 MHz,  $\text{CDCl}_3$ ):  $\delta$  = 8.19-8.16 (m, 2H), 7.82-7.78 (m, 2H), 7.62-7.60 (m, 1H), 7.57-7.54 (m, 2H), 7.33-7.30 (m, 2H), 7.25-7.22 (m, 2H), 7.06 (dd,  $J$  = 8.4 Hz, 2.4 Hz, 1H), 6.94-6.91 (m, 2H), 6.86-6.84 (m, 2H), 6.78 (d,  $J$  = 8.4 Hz, 1H), 6.29 (d,  $J$  = 5.4 Hz, 1H), 3.81 (s, 3H), 3.60 (s, 3H), 1.12 (s, 9H);  $^{13}\text{C}\{^1\text{H}\}$  NMR (150 MHz,  $\text{CDCl}_3$ ):  $\delta$  = 168.0 (d,  $J_{\text{C-P}}$  = 6.0 Hz), 159.5, 149.9 (d,  $J_{\text{C-P}}$  = 6.0 Hz), 144.3, 138.6 (d,  $J_{\text{C-P}}$  = 7.5 Hz), 138.3 (d,  $J_{\text{C-P}}$  = 1.5 Hz), 132.6 (d,  $J_{\text{C-P}}$  = 9.0 Hz), 132.5 (d,  $J_{\text{C-P}}$  = 1.5 Hz), 132.2, 132.1, 129.8 (d,  $J_{\text{C-P}}$  = 102.0 Hz), 129.4, 128.5 (d,  $J_{\text{C-P}}$  = 94.5 Hz), 128.4 (d,  $J_{\text{C-P}}$  = 12.0 Hz), 127.9 (d,  $J_{\text{C-P}}$  = 12.0 Hz), 126.8, 122.9, 120.9, 119.3 (d,  $J_{\text{C-P}}$  = 1.5 Hz), 116.3 (d,  $J_{\text{C-P}}$  = 4.5 Hz), 115.5, 114.3, 113.6, 84.5 (d,  $J_{\text{C-P}}$  = 76.5 Hz), 55.3, 53.0, 34.1, 31.2;  $^{31}\text{P}\{^1\text{H}\}$  NMR (243 MHz,  $\text{CDCl}_3$ ):  $\delta$  = 28.1; HRMS (ESI): Exact mass calcd for  $\text{C}_{34}\text{H}_{33}\text{O}_5\text{P}$   $[\text{M}+\text{Na}]^+$ : 575.1958, Found: 575.1959.

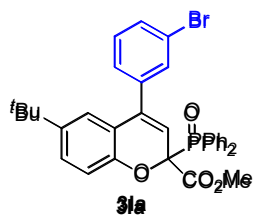

Column chromatography afforded the desired product **3la** in 89% yield (160.6 mg) as white solid; Mp: 146-148 °C;  $^1\text{H}$  NMR (600 MHz,  $\text{CDCl}_3$ ):  $\delta$  = 8.19-8.16 (m, 2H), 7.81-7.78 (m, 2H), 7.64-7.61 (m, 1H), 7.58-7.55 (m, 2H), 7.53-7.52 (m, 1H), 7.48 (s, 1H), 7.35-7.33 (m, 1H), 7.30-7.28 (m, 1H), 7.27-7.24 (m, 3H), 7.09 (dd,  $J$  = 8.4 Hz, 1.8 Hz, 1H), 6.80 (d,  $J$  = 8.4 Hz, 1H), 6.77 (d,  $J$  = 1.8 Hz, 1H), 6.30 (d,  $J$  = 5.4 Hz, 1H), 3.60 (s, 3H), 1.13 (s, 9H);  $^{13}\text{C}\{^1\text{H}\}$  NMR (150 MHz,  $\text{CDCl}_3$ ):  $\delta$  = 167.8 (d,  $J_{\text{C-P}}$  = 4.5 Hz), 149.9 (d,  $J_{\text{C-P}}$  = 4.5

Hz), 144.5, 139.0, 137.4 (d,  $J_{C-P} = 9.0$  Hz), 132.61, 132.60 (d,  $J_{C-P} = 9.0$  Hz), 132.2 (d,  $J_{C-P} = 3.0$  Hz), 132.1 (d,  $J_{C-P} = 7.5$  Hz), 131.5, 131.3, 129.9, 129.7 (d,  $J_{C-P} = 100.5$  Hz), 128.5 (d,  $J_{C-P} = 12.0$  Hz), 128.3 (d,  $J_{C-P} = 94.5$  Hz), 127.9 (d,  $J_{C-P} = 12.0$  Hz), 127.1 (d,  $J_{C-P} = 13.5$  Hz), 122.5 (d,  $J_{C-P} = 12.0$  Hz), 118.9 (d,  $J_{C-P} = 3.0$  Hz), 117.2 (d,  $J_{C-P} = 3.0$  Hz), 115.7, 84.4 (d,  $J_{C-P} = 76.5$  Hz), 53.1, 34.1, 31.2;  $^{31}\text{P}\{^1\text{H}\}$  NMR (243 MHz,  $\text{CDCl}_3$ ):  $\delta = 28.2$ ; HRMS (ESI): Exact mass calcd for  $\text{C}_{33}\text{H}_{30}\text{BrO}_4\text{P} [\text{M}+\text{Na}]^+$ : 623.0957, Found: 623.0948.

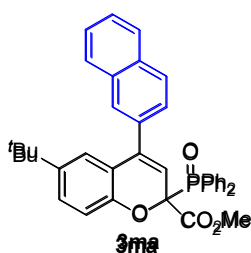

Column chromatography afforded **3ma** in 97% yield (166.6 mg) as white solid; Mp: 62-64 °C;  $^1\text{H}$  NMR (600 MHz,  $\text{CDCl}_3$ ):  $\delta = 8.22$ -8.19 (m, 2H), 7.89-7.86 (m, 4H), 7.85-7.81 (m, 2H), 7.64-7.62 (m, 1H), 7.59-7.56 (m, 2H), 7.54-7.52 (m, 2H), 7.40 (dd,  $J = 8.4$  Hz, 1.8 Hz, 1H), 7.33-7.30 (m, 1H), 7.25-7.22 (m, 2H), 7.08 (dd,  $J = 8.4$  Hz, 2.4 Hz, 1H), 6.88 (d,  $J = 2.4$  Hz, 1H), 6.82 (d,  $J = 8.4$  Hz, 1H), 6.42 (d,

$J = 5.4$  Hz, 1H), 3.62 (s, 3H), 1.11 (s, 9H);  $^{13}\text{C}\{^1\text{H}\}$  NMR (150 MHz,  $\text{CDCl}_3$ ):  $\delta = 168.1$ , 150.2 (d,  $J_{C-P} = 6.0$  Hz), 144.5, 138.9 (d,  $J_{C-P} = 7.5$  Hz), 134.7, 133.4 (d,  $J_{C-P} = 39.0$  Hz), 132.8 (d,  $J_{C-P} = 9.0$  Hz), 132.7, 132.2 (d,  $J_{C-P} = 9.0$  Hz), 130.0 (d,  $J_{C-P} = 100.5$  Hz), 128.6 (d,  $J_{C-P} = 94.5$  Hz), 128.57 (d,  $J_{C-P} = 12.0$  Hz), 128.1 (d,  $J_{C-P} = 30.0$  Hz), 127.9 (d,  $J_{C-P} = 9.0$  Hz), 127.8 (d,  $J_{C-P} = 6.0$  Hz), 127.0, 126.5 (d,  $J_{C-P} = 4.5$  Hz), 126.4, 123.2, 116.9 (d,  $J_{C-P} = 3.0$  Hz), 115.7, 84.8 (d,  $J_{C-P} = 78.0$  Hz), 53.2, 34.2, 31.3;  $^{31}\text{P}\{^1\text{H}\}$  NMR (243 MHz,  $\text{CDCl}_3$ ):  $\delta = 28.8$ ; HRMS (ESI): Exact mass calcd for  $\text{C}_{37}\text{H}_{33}\text{O}_4\text{P} [\text{M}+\text{Na}]^+$ : 595.2009, Found: 595.2004.

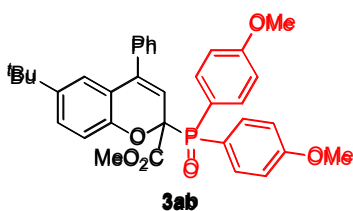

Column chromatography afforded the desired product **3ab** in 63% yield (110.1 mg) as white solid; Mp: 47-49 °C;  $^1\text{H}$  NMR (600 MHz,  $\text{CDCl}_3$ ):  $\delta = 8.11$ -8.07 (m, 2H), 7.71-7.68 (m, 2H), 7.42-7.37 (m, 3H), 7.34-7.33 (m, 2H), 7.06-7.04 (m, 3H), 6.82 (d,  $J = 2.4$  Hz, 1H), 6.77 (d,  $J = 8.4$  Hz,

1H), 6.72-6.71 (m, 2H), 6.28 (d,  $J = 5.4$  Hz, 1H), 3.87 (s, 3H), 3.70 (s, 3H), 3.62 (s, 3H), 1.12 (s, 9H);  $^{13}\text{C}\{^1\text{H}\}$  NMR (150 MHz,  $\text{CDCl}_3$ ):  $\delta = 168.2$  (d,  $J_{C-P} = 4.5$  Hz), 162.8 (d,  $J_{C-P} = 3.0$  Hz), 162.5 (d,  $J_{C-P} = 3.0$  Hz), 150.0 (d,  $J_{C-P} = 4.5$  Hz), 144.2, 138.5 (d,  $J_{C-P} = 9.0$  Hz), 137.1, 134.5 (d,  $J_{C-P} = 9.0$  Hz), 134.0 (d,  $J_{C-P} = 10.5$  Hz), 128.5, 128.4, 128.2, 126.6, 122.8, 121.1 (d,  $J_{C-P} = 106.5$  Hz), 119.6 (d,  $J_{C-P} = 100.5$  Hz), 119.4, 116.8 (d,  $J_{C-P} = 4.5$  Hz), 115.5, 114.0 (d,  $J_{C-P} = 13.5$  Hz), 113.4 (d,  $J_{C-P} = 12.0$  Hz), 84.7 (d,  $J_{C-P} = 76.5$  Hz), 55.3, 55.1, 53.0, 34.1, 31.2;  $^{31}\text{P}\{^1\text{H}\}$  NMR (243 MHz,  $\text{CDCl}_3$ ):  $\delta = 28.3$ ; HRMS (ESI): Exact

mass calcd for C<sub>35</sub>H<sub>35</sub>O<sub>6</sub>P [M+Na]<sup>+</sup>: 605.2063, Found: 605.2061.

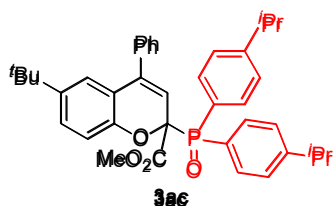

Column chromatography afforded the desired product **3ac** in 84% yield

(152.9 mg) as white solid; Mp: 154-156 °C; <sup>1</sup>H NMR (600 MHz, CDCl<sub>3</sub>):

δ = 8.06 (ABd, *J* = 10.8 Hz, 8.4 Hz, 2H), 7.74 (ABd, *J* = 10.8 Hz, 8.4 Hz, 2H), 7.40-7.39 (m, 5H), 7.30-7.29 (m, 2H), 7.12-7.10 (m, 2H), 7.6 (dd, *J* =

8.4 Hz, 2.4 Hz, 1H), 6.85 (d, *J* = 2.4 Hz, 1H), 6.76 (d, *J* = 8.4 Hz, 1H), 6.25 (d, *J* = 5.4 Hz, 1H), 3.58 (s, 3H), 3.00-2.96 (m, 1H), 2.81-2.76 (m, 1H), 1.29 (d, *J* = 6.6 Hz, 6H), 1.13 (d, *J* = 6.6 Hz, 6H), 1.12 (s, 9H); <sup>13</sup>C{<sup>1</sup>H} NMR (150 MHz, CDCl<sub>3</sub>): δ = 168.3 (d, *J*<sub>C-P</sub> = 4.5 Hz), 153.4 (d, *J*<sub>C-P</sub> = 61.5 Hz), 150.1 (d, *J*<sub>C-P</sub> = 4.5 Hz), 144.2, 138.3 (d, *J*<sub>C-P</sub> = 7.5 Hz), 137.2, 132.8 (d, *J*<sub>C-P</sub> = 9.0 Hz), 132.3 (d, *J*<sub>C-P</sub> = 9.0 Hz), 128.5 (d, *J*<sub>C-P</sub> = 30.0 Hz), 128.2, 127.2 (d, *J*<sub>C-P</sub> = 102.0 Hz), 126.8 (d, *J*<sub>C-P</sub> = 22.5 Hz), 126.6, 126.1 (d, *J*<sub>C-P</sub> = 13.5 Hz), 125.2 (d, *J*<sub>C-P</sub> = 94.5 Hz), 122.8, 119.3, 116.8 (d, *J*<sub>C-P</sub> = 3.0 Hz), 115.5, 84.8 (d, *J*<sub>C-P</sub> = 76.5 Hz), 52.9, 34.2, 34.12, 34.06, 31.3, 23.70, 23.66, 23.6, 23.5; <sup>31</sup>P{<sup>1</sup>H} NMR (243 MHz, CDCl<sub>3</sub>): δ = 29.4; HRMS (ESI): Exact mass calcd for C<sub>39</sub>H<sub>43</sub>O<sub>4</sub>P [M+Na]<sup>+</sup>: 629.2791, Found: 629.2785.

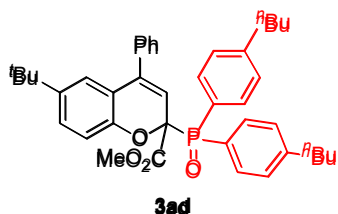

Column chromatography afforded the desired product **3ad** in 65% yield

(123.8 mg) as yellow oil; <sup>1</sup>H NMR (600 MHz, CDCl<sub>3</sub>): δ = 8.07-8.04 (m,

2H), 7.72-7.68 (m, 2H), 7.42-7.38 (m, 3H), 7.37-7.35 (m, 2H), 7.32-7.31 (m, 2H), 7.06-7.04 (m, 3H), 6.83 (d, *J* = 1.8 Hz, 1H), 6.75 (d, *J* = 8.4 Hz, 1H), 6.25 (d, *J* = 4.8 Hz, 1H), 3.58 (s, 3H), 2.69 (t, *J* = 7.8 Hz, 2H), 2.48 (t,

*J* = 7.8 Hz, 2H), 1.66-1.62 (m, 2H), 1.49-1.44 (m, 2H), 1.40-1.34 (m, 2H), 1.29-1.21 (m, 2H), 1.12 (s, 9H), 0.94 (t, *J* = 1.8 Hz, 3H), 0.85 (t, *J* = 1.8 Hz, 3H); <sup>13</sup>C{<sup>1</sup>H} NMR (150 MHz, CDCl<sub>3</sub>): δ = 168.1 (d, *J*<sub>C-P</sub> = 3.0 Hz), 150.0 (d, *J*<sub>C-P</sub> = 4.5 Hz), 147.7 (d, *J*<sub>C-P</sub> = 72.0 Hz), 144.2, 138.6 (d, *J*<sub>C-P</sub> = 7.5 Hz), 137.1, 132.7 (d, *J*<sub>C-P</sub> = 9.0 Hz), 132.2 (d, *J*<sub>C-P</sub> = 9.0 Hz), 128.5 (d, *J*<sub>C-P</sub> = 24.0 Hz), 128.4 (d, *J*<sub>C-P</sub> = 58.5 Hz), 128.0 (d, *J*<sub>C-P</sub> = 9.0 Hz), 126.7, 126.6 (d, *J*<sub>C-P</sub> = 103.5 Hz), 125.2 (d, *J*<sub>C-P</sub> = 97.5 Hz), 122.8, 119.3, 116.5 (d, *J*<sub>C-P</sub> = 3.0 Hz), 115.5, 84.7 (d, *J*<sub>C-P</sub> = 78.0 Hz), 53.0, 35.8, 35.5, 33.2, 33.0, 31.3, 22.4, 22.2, 13.9, 13.8; <sup>31</sup>P{<sup>1</sup>H} NMR (243 MHz, CDCl<sub>3</sub>): δ = 29.9; HRMS (ESI): Exact mass calcd for C<sub>41</sub>H<sub>47</sub>O<sub>4</sub>P [M+Na]<sup>+</sup>: 657.3104, Found: 657.3110.

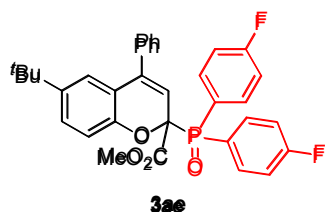

Column chromatography afforded the desired product **3ae** in 90% yield (150.8 mg) as white solid; Mp: 54-56 °C;  $^1\text{H}$  NMR (600 MHz,  $\text{CDCl}_3$ ):  $\delta$  = 8.22-8.18 (m, 2H), 7.78-7.74 (m, 2H), 7.44-7.39 (m, 3H), 7.33-7.32 (m, 2H), 7.28-7.25 (m, 2H), 7.08 (dd,  $J$  = 8.4 Hz, 2.4 Hz, 1H), 6.92-6.89 (m, 2H), 6.81 (d,  $J$  = 2.4 Hz, 1H), 6.76 (d,  $J$  = 8.4 Hz, 1H), 6.24 (d,  $J$  = 5.4 Hz, 1H), 3.64 (s, 3H), 1.12 (s, 9H);  $^{13}\text{C}\{^1\text{H}\}$  NMR (150 MHz,  $\text{CDCl}_3$ ):  $\delta$  = 167.7 (d,  $J_{\text{C-P}}$  = 4.5 Hz), 166.2 (d,  $J_{\text{C-F}}$  = 52.5 Hz), 164.5 (d,  $J_{\text{C-F}}$  = 52.5 Hz), 149.7 (d,  $J_{\text{C-P}}$  = 4.5 Hz), 144.8, 139.2 (d,  $J_{\text{C-P}}$  = 7.5 Hz), 136.8, 135.22, 135.21 (d,  $J_{\text{C-P}}$  = 19.5 Hz), 134.8 (d,  $J_{\text{C-P}}$  = 18.0 Hz), 134.77, 128.51, 128.47 (d,  $J_{\text{C-P}}$  = 6.0 Hz), 127.0, 125.6 (d,  $J_{\text{C-P}}$  = 106.5 Hz), 124.2 (d,  $J_{\text{C-P}}$  = 97.5 Hz), 123.0, 119.2 (d,  $J_{\text{C-P}}$  = 1.5 Hz), 116.1 (d,  $J_{\text{C-F}}$  = 34.5 Hz), 116.1 (d,  $J_{\text{C-P}}$  = 7.5 Hz), 115.9 (d,  $J_{\text{C-P}}$  = 3.0 Hz), 115.5, 115.4, 115.3 (d,  $J_{\text{C-P}}$  = 12.0 Hz), 84.6 (d,  $J_{\text{C-P}}$  = 79.5 Hz), 53.2, 34.2, 31.2;  $^{31}\text{P}\{^1\text{H}\}$  NMR (243 MHz,  $\text{CDCl}_3$ ):  $\delta$  = 26.4;  $^{19}\text{F}\{^1\text{H}\}$  NMR (564 MHz,  $\text{CDCl}_3$ ):  $\delta$  = -105.0 (1F), -105.8 (1F); HRMS (ESI): Exact mass calcd for  $\text{C}_{33}\text{H}_{29}\text{F}_2\text{O}_4\text{P}$   $[\text{M}+\text{Na}]^+$ : 581.1664, Found: 581.1662.

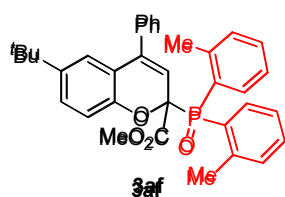

Column chromatography afforded product **3af** in 77% yield (127.2 mg) as white solid; Mp: 49-51 °C;  $^1\text{H}$  NMR (600 MHz,  $\text{CDCl}_3$ ):  $\delta$  = 8.20 (dd,  $J$  = 13.2 Hz, 7.2 Hz, 1H), 7.71 (dd,  $J$  = 13.2 Hz, 7.8 Hz, 1H), 7.46-7.44 (m, 1H), 7.41-7.36 (m, 4H), 7.29-7.28 (m, 2H), 7.25-7.24 (m, 1H), 7.20-7.18 (m, 1H), 7.08 (dd,  $J$  = 8.4 Hz, 2.4 Hz, 1H), 7.02-6.98 (m, 2H), 6.82 (d,  $J$  = 2.4 Hz, 1H), 6.78 (d,  $J$  = 8.4 Hz, 1H), 6.34 (d,  $J$  = 5.4 Hz, 1H), 3.74 (s, 3H), 2.40 (s, 3H), 2.34 (s, 3H), 1.12 (s, 9H);  $^{13}\text{C}\{^1\text{H}\}$  NMR (150 MHz,  $\text{CDCl}_3$ ):  $\delta$  = 169.0 (d,  $J_{\text{C-P}}$  = 6.0 Hz), 149.8 (d,  $J_{\text{C-P}}$  = 6.0 Hz), 144.2, 143.3 (d,  $J_{\text{C-P}}$  = 9.0 Hz), 138.2 (d,  $J_{\text{C-P}}$  = 9.0 Hz), 137.1, 134.2 (d,  $J_{\text{C-P}}$  = 10.5 Hz), 132.1, 132.0, 131.8 (d,  $J_{\text{C-P}}$  = 3.0 Hz), 131.7 (d,  $J_{\text{C-P}}$  = 10.5 Hz), 131.6 (d,  $J_{\text{C-P}}$  = 10.5 Hz), 129.5 (d,  $J_{\text{C-P}}$  = 93.0 Hz), 128.5 (d,  $J_{\text{C-P}}$  = 94.5 Hz), 128.4, 128.2, 126.8, 125.4 (d,  $J_{\text{C-P}}$  = 12.0 Hz), 124.9 (d,  $J_{\text{C-P}}$  = 12.0 Hz), 122.8, 119.0 (d,  $J_{\text{C-P}}$  = 1.5 Hz), 117.1 (d,  $J_{\text{C-P}}$  = 3.0 Hz), 115.4, 84.6 (d,  $J_{\text{C-P}}$  = 79.5 Hz), 53.2, 34.1, 31.2, 21.94, 21.92, 21.5, 21.4;  $^{31}\text{P}\{^1\text{H}\}$  NMR (243 MHz,  $\text{CDCl}_3$ ):  $\delta$  = 33.8; HRMS (ESI): Exact mass calcd for  $\text{C}_{35}\text{H}_{35}\text{O}_4\text{P}$   $[\text{M}+\text{Na}]^+$ : 573.2165, Found: 573.2162.

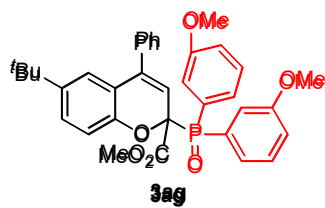

Column chromatography afforded the desired product **3ag** in 89% yield (155.6 mg) as white solid; Mp: 46-48 °C;  $^1\text{H}$  NMR (600 MHz,  $\text{CDCl}_3$ ):  $\delta$  = 7.77-7.74 (m, 1H), 7.71-7.68 (m, 1H), 7.48-7.45 (m, 1H), 7.43-7.39 (m, 3H), 7.38-7.35 (m, 1H), 7.36-7.30 (m, 3H), 7.15-7.12 (m, 2H), 7.05 (dd,  $J$  = 9.0 Hz, 2.4 Hz, 1H), 6.84-6.82 (m, 2H), 6.74 (d,  $J$  = 8.4 Hz, 1H), 6.27 (d,  $J$  = 12.0 Hz, 1H), 3.88 (s, 3H), 3.62 (s, 3H), 3.61 (s, 3H), 1.12 (s, 9H);  $^{13}\text{C}\{^1\text{H}\}$  NMR (150 MHz,  $\text{CDCl}_3$ ):  $\delta$  = 168.0 (d,  $J_{\text{C-P}}$  = 4.5 Hz), 159.5 (d,  $J_{\text{C-P}}$  = 15.0 Hz), 158.9 (d,  $J_{\text{C-P}}$  = 15.0 Hz), 149.9 (d,  $J_{\text{C-P}}$  = 4.5 Hz), 144.3, 138.8 (d,  $J_{\text{C-P}}$  = 9.0 Hz), 137.0, 131.1 (d,  $J_{\text{C-P}}$  = 100.5 Hz), 129.7 (d,  $J_{\text{C-P}}$  = 93.0 Hz), 129.66 (d,  $J_{\text{C-P}}$  = 13.5 Hz), 129.1 (d,  $J_{\text{C-P}}$  = 15.0 Hz), 128.5 (d,  $J_{\text{C-P}}$  = 12.0 Hz), 128.4, 126.9, 125.1 (d,  $J_{\text{C-P}}$  = 9.0 Hz), 124.2 (d,  $J_{\text{C-P}}$  = 9.0 Hz), 122.8, 119.3 (d,  $J_{\text{C-P}}$  = 1.5 Hz), 119.2, 118.9 (d,  $J_{\text{C-P}}$  = 3.0 Hz), 117.0 (d,  $J_{\text{C-P}}$  = 9.0 Hz), 116.5 (d,  $J_{\text{C-P}}$  = 13.5 Hz), 115.6, 84.7 (d,  $J_{\text{C-P}}$  = 78.0 Hz), 55.5, 55.1, 53.1, 34.1, 31.2;  $^{31}\text{P}\{^1\text{H}\}$  NMR (243 MHz,  $\text{CDCl}_3$ ):  $\delta$  = 29.1; HRMS (ESI): Exact mass calcd for  $\text{C}_{35}\text{H}_{35}\text{O}_6\text{P}$   $[\text{M}+\text{Na}]^+$ : 605.2063, Found: 605.2060.

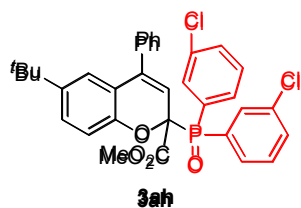

**3ah** was obtained in 80% yield (142.0 mg) as white solid; Mp: 47-49 °C;  $^1\text{H}$  NMR (600 MHz,  $\text{CDCl}_3$ ):  $\delta$  = 8.15 (d,  $J$  = 11.4 Hz, 1H), 8.12-8.09 (m, 1H), 7.75 (d,  $J$  = 11.4 Hz, 1H), 7.65-7.60 (m, 2H), 7.55-7.52 (m, 1H), 7.44-7.39 (m, 3H), 7.34-7.33 (m, 2H), 7.25 (s, 1H), 7.18-7.15 (m, 1H), 7.09 (dd,  $J$  = 8.4 Hz, 2.4 Hz, 1H), 6.80 (d,  $J$  = 2.4 Hz, 1H), 6.78 (d,  $J$  = 8.4 Hz, 1H), 6.19 (d,  $J$  = 5.4 Hz, 1H), 3.66 (s, 3H), 1.12 (s, 9H);  $^{13}\text{C}\{^1\text{H}\}$  NMR (150 MHz,  $\text{CDCl}_3$ ):  $\delta$  = 167.4 (d,  $J_{\text{C-P}}$  = 4.5 Hz), 149.5 (d,  $J_{\text{C-P}}$  = 4.5 Hz), 144.6, 139.6 (d,  $J_{\text{C-P}}$  = 9.0 Hz), 136.7, 135.2 (d,  $J_{\text{C-P}}$  = 15.0 Hz), 134.4 (d,  $J_{\text{C-P}}$  = 16.5 Hz), 133.0 (d,  $J_{\text{C-P}}$  = 1.5 Hz), 132.6 (d,  $J_{\text{C-P}}$  = 9.0 Hz), 132.5 (d,  $J_{\text{C-P}}$  = 1.5 Hz), 132.1 (d,  $J_{\text{C-P}}$  = 9.0 Hz), 131.5 (d,  $J_{\text{C-P}}$  = 97.5 Hz), 130.7 (d,  $J_{\text{C-P}}$  = 9.0 Hz), 130.3 (d,  $J_{\text{C-P}}$  = 91.5 Hz), 129.96 (d,  $J_{\text{C-P}}$  = 16.5 Hz), 129.95, 129.2 (d,  $J_{\text{C-P}}$  = 13.5 Hz), 128.4 (d,  $J_{\text{C-P}}$  = 3.0 Hz), 127.2, 123.0, 119.0, 115.4, 115.36 (d,  $J_{\text{C-P}}$  = 4.5 Hz), 84.8 (d,  $J_{\text{C-P}}$  = 78.0 Hz), 53.3, 34.1, 31.1;  $^{31}\text{P}\{^1\text{H}\}$  NMR (243 MHz,  $\text{CDCl}_3$ ):  $\delta$  = 25.0; HRMS (ESI): Exact mass calcd for  $\text{C}_{33}\text{H}_{29}\text{Cl}_2\text{O}_4\text{P}$   $[\text{M}+\text{Na}]^+$ : 613.1073, Found: 613.1070.

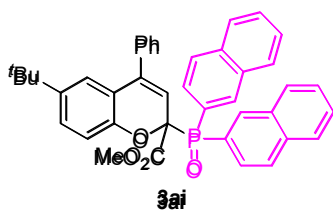

Column chromatography afforded **3ai** in 77% yield (143.8 mg) as white solid; Mp: 176-178 °C;  $^1\text{H}$  NMR (600 MHz,  $\text{CDCl}_3$ ):  $\delta$  = 8.81 (d,  $J$  = 13.2 Hz, 1H), 8.42 (d,  $J$  = 13.8 Hz, 1H), 8.30 (t,  $J$  = 8.4 Hz, 1H), 8.06-8.02 (m,



2H), 7.94 (d,  $J = 8.4$  Hz, 1H), 7.83 (t,  $J = 9.0$  Hz, 1H), 7.73 (d,  $J = 7.8$  Hz, 1H), 7.69 (d,  $J = 8.4$  Hz, 1H), 7.66-7.64 (m, 2H), 7.61-7.58 (m, 1H), 7.49-7.47 (m, 1H), 7.44-7.38 (m, 4H), 7.35-7.33 (m, 2H), 6.92 (dd,  $J = 9.0$  Hz, 2.4 Hz, 1H), 6.77 (d,  $J = 9.0$  Hz, 1H), 6.69 (d,  $J = 2.4$  Hz, 1H), 6.38 (d,  $J = 4.8$  Hz, 1H), 3.58 (s, 3H), 0.97 (s, 9H);  $^{13}\text{C}\{^1\text{H}\}$  NMR (150 MHz,  $\text{CDCl}_3$ ):  $\delta = 168.0$  (d,  $J_{\text{C-P}} = 4.5$  Hz), 149.8 (d,  $J_{\text{C-P}} = 4.5$  Hz), 144.2, 138.9 (d,  $J_{\text{C-P}} = 9.0$  Hz), 137.0, 135.1 (d,  $J_{\text{C-P}} = 9.0$  Hz), 135.0, 134.8 (d,  $J_{\text{C-P}} = 9.0$  Hz), 134.6, 132.5 (d,  $J_{\text{C-P}} = 13.5$  Hz), 132.0 (d,  $J_{\text{C-P}} = 13.5$  Hz), 129.2, 128.9, 128.5, 128.4, 128.36 (d,  $J_{\text{C-P}} = 27.0$  Hz), 128.12, 128.11 (d,  $J_{\text{C-P}} = 12.0$  Hz), 127.9, 127.5, 127.4 (d,  $J_{\text{C-P}} = 33.0$  Hz), 126.9 (d,  $J_{\text{C-P}} = 82.5$  Hz), 126.89, 126.8, 126.7, 126.5, 125.9 (d,  $J_{\text{C-P}} = 100.5$  Hz), 122.6, 119.2, 116.4 (d,  $J_{\text{C-P}} = 4.5$  Hz), 115.4, 85.1 (d,  $J_{\text{C-P}} = 76.5$  Hz), 53.1, 33.9, 31.1;  $^{31}\text{P}\{^1\text{H}\}$  NMR (243 MHz,  $\text{CDCl}_3$ ):  $\delta = 28.4$ ; HRMS (ESI): Exact mass calcd for  $\text{C}_{41}\text{H}_{35}\text{O}_4\text{P}$   $[\text{M}+\text{Na}]^+$ : 645.2165, Found: 645.2161.

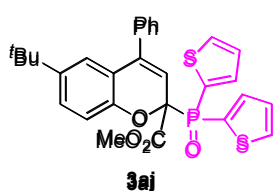

Column chromatography afforded the desired product **3aj** in 89% yield (142.7

mg) as white solid; Mp: 46-48 °C;  $^1\text{H}$  NMR (600 MHz,  $\text{CDCl}_3$ ):  $\delta = 7.97$  (dd,  $J = 12.6$  Hz, 3.6 Hz, 1H), 7.82 (t,  $J = 4.8$  Hz, 1H), 7.67 (dd,  $J = 7.2$  Hz, 3.6 Hz, 1H), 7.62 (t,  $J = 4.8$  Hz, 1H), 7.42-7.37 (m, 3H), 7.32-7.30 (m, 2H), 7.25-7.24

(m, 1H), 7.14 (dd,  $J = 8.4$  Hz, 2.4 Hz, 1H), 7.02-7.00 (m, 1H), 6.91 (d,  $J = 8.4$  Hz, 1H), 6.88 (d,  $J = 2.4$  Hz, 1H), 6.22 (d,  $J = 6.6$  Hz, 1H), 3.73 (s, 3H), 1.14 (s, 9H);  $^{13}\text{C}\{^1\text{H}\}$  NMR (150 MHz,  $\text{CDCl}_3$ ):  $\delta = 167.5$  (d,  $J_{\text{C-P}} = 4.5$  Hz), 149.9 (d,  $J_{\text{C-P}} = 6.0$  Hz), 144.5, 139.4 (d,  $J_{\text{C-P}} = 10.5$  Hz), 138.2 (d,  $J_{\text{C-P}} = 10.5$  Hz), 137.7 (d,  $J_{\text{C-P}} = 9.0$  Hz), 136.9, 135.0 (d,  $J_{\text{C-P}} = 4.5$  Hz), 134.9 (d,  $J_{\text{C-P}} = 4.5$  Hz), 129.3 (d,  $J_{\text{C-P}} = 117.0$  Hz), 128.5 (d,  $J_{\text{C-P}} = 1.5$  Hz), 128.4, 128.3, 128.2 (d,  $J_{\text{C-P}} = 109.5$  Hz), 128.0 (d,  $J_{\text{C-P}} = 15.0$  Hz), 127.7 (d,  $J_{\text{C-P}} = 15.0$  Hz), 127.0, 123.0, 119.3 (d,  $J_{\text{C-P}} = 2.0$  Hz), 115.7, 115.3 (d,  $J_{\text{C-P}} = 3.0$  Hz), 84.0 (d,  $J_{\text{C-P}} = 91.5$  Hz), 53.2, 34.1, 31.2;  $^{31}\text{P}\{^1\text{H}\}$  NMR (243 MHz,  $\text{CDCl}_3$ ):  $\delta = 19.7$ ; HRMS (ESI): Exact mass calcd for  $\text{C}_{29}\text{H}_{27}\text{O}_4\text{PS}_2$   $[\text{M}+\text{Na}]^+$ : 557.0981, Found: 557.0984.

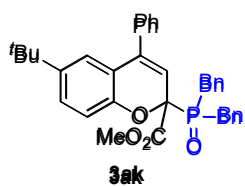

Column chromatography afforded the desired product **3ak** in 30% yield (84.4 mg)

as yellow oil;  $^1\text{H}$  NMR (600 MHz,  $\text{CDCl}_3$ ):  $\delta = 7.37$ -7.33 (m, 5H), 7.30-7.27 (m, 3H), 7.23-7.19 (m, 3H), 7.15-7.13 (m, 2H), 7.10-7.03 (m, 5H), 5.95 (d,  $J = 6.0$  Hz, 1H), 3.55 (s, 3H), 3.40-3.33 (m, 3H), 3.20 (dd,  $J = 15.0$  Hz, 12.6 Hz, 1H), 1.21 (s,

9H);  $^{13}\text{C}\{^1\text{H}\}$  NMR (150 MHz,  $\text{CDCl}_3$ ):  $\delta = 168.2$  (d,  $J_{\text{C-P}} = 4.5$  Hz), 150.0 (d,  $J_{\text{C-P}} = 7.5$  Hz), 144.9, 137.6 (d,  $J_{\text{C-P}} = 7.5$  Hz), 136.7, 130.7 (d,  $J_{\text{C-P}} = 1.5$  Hz), 130.6 (d,  $J_{\text{C-P}} = 3.0$  Hz), 130.5 (d,  $J_{\text{C-P}} = 6.0$  Hz),



130.2 (d,  $J_{C-P} = 4.5$  Hz), 128.6, 128.5 (d,  $J_{C-P} = 1.5$  Hz), 128.3, 128.23, 128.16, 127.2, 126.9 (d,  $J_{C-P} = 3.0$  Hz), 126.8 (d,  $J_{C-P} = 1.5$  Hz), 123.4, 119.9, 116.2 (d,  $J_{C-P} = 1.5$  Hz), 115.9, 81.2 (d,  $J_{C-P} = 73.5$  Hz), 53.0, 34.3, 33.6, 33.2, 32.9, 32.6, 31.3;  $^{31}\text{P}\{^1\text{H}\}$  NMR (243 MHz,  $\text{CDCl}_3$ ):  $\delta = 42.8$ ; HRMS (ESI): Exact mass calcd for  $\text{C}_{35}\text{H}_{35}\text{O}_4\text{P}$   $[\text{M}+\text{Na}]^+$ : 573.2165, Found: 573.2161.

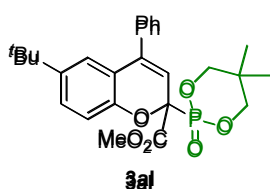

Column chromatography afforded the desired product **3al** in 81% yield (114.3

mg) as white solid; Mp: 167-169 °C;  $^1\text{H}$  NMR (600 MHz,  $\text{CDCl}_3$ ):  $\delta = 7.43$ -7.38 (m, 5H), 7.26-7.24 (m, 1H), 7.11 (d,  $J = 1.8$  Hz, 1H), 6.96 (d,  $J = 8.4$  Hz, 1H), 6.15 (d,  $J = 7.8$  Hz, 1H), 4.68 (dd,  $J = 10.8$  Hz, 2.4 Hz, 1H), 4.42 (dd,

$J = 10.8$  Hz, 2.4 Hz, 1H), 4.10-4.05 (m, 1H), 4.00-3.95 (m, 1H), 3.85 (s, 3H), 1.32 (s, 3H), 1.20 (s, 9H), 0.93 (s, 3H);  $^{13}\text{C}\{^1\text{H}\}$  NMR (150 MHz,  $\text{CDCl}_3$ ):  $\delta = 167.8$  (d,  $J_{C-P} = 4.5$  Hz), 149.6 (d,  $J_{C-P} = 10.5$  Hz), 145.1, 137.7 (d,  $J_{C-P} = 10.5$  Hz), 136.7, 128.7, 128.3, 127.0, 123.5, 119.9, 116.6 (d,  $J_{C-P} = 6.0$  Hz), 115.4, 83.5 (d,  $J_{C-P} = 159.0$  Hz), 79.8 (d,  $J_{C-P} = 7.5$  Hz), 79.2 (d,  $J_{C-P} = 7.5$  Hz), 53.5, 34.3, 32.6, 32.5, 31.3, 22.2, 20.6;  $^{31}\text{P}\{^1\text{H}\}$  NMR (243 MHz,  $\text{CDCl}_3$ ):  $\delta = 3.4$ ; HRMS (ESI): Exact mass calcd for  $\text{C}_{26}\text{H}_{31}\text{O}_6\text{P}$   $[\text{M}+\text{Na}]^+$ : 493.1750, Found: 493.1744.

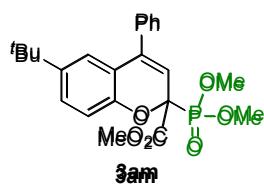

Column chromatography afforded the desired product **3am** in 88% yield (113.6

mg) as white solid; Mp: 57-59 °C;  $^1\text{H}$  NMR (600 MHz,  $\text{CDCl}_3$ ):  $\delta = 7.44$ -7.37 (m, 5H), 7.24 (dd,  $J = 8.4$  Hz, 2.4 Hz, 1H), 7.04 (d,  $J = 2.4$  Hz, 1H), 7.01 (d,  $J = 8.4$  Hz, 1H), 5.98 (d,  $J = 6.6$  Hz, 1H), 3.861 (s, 3H), 3.858 (d,  $J = 9.0$  Hz, 3H),

3.84 (d,  $J = 9.0$  Hz, 3H), 1.18 (s, 9H);  $^{13}\text{C}\{^1\text{H}\}$  NMR (150 MHz,  $\text{CDCl}_3$ ):  $\delta = 167.9$  (d,  $J_{C-P} = 4.5$  Hz), 150.1 (d,  $J_{C-P} = 7.5$  Hz), 144.7, 138.4 (d,  $J_{C-P} = 10.5$  Hz), 136.9 (d,  $J_{C-P} = 3.0$  Hz), 128.6 (d,  $J_{C-P} = 1.5$  Hz), 128.4 (d,  $J_{C-P} = 3.0$  Hz), 127.2, 123.1, 119.5 (d,  $J_{C-P} = 3.0$  Hz), 116.2 (d,  $J_{C-P} = 6.0$  Hz), 115.8, 81.6 (d,  $J_{C-P} = 163.5$  Hz), 54.92, 54.87, 54.80, 54.75, 53.5, 34.2, 31.3;  $^{31}\text{P}\{^1\text{H}\}$  NMR (243 MHz,  $\text{CDCl}_3$ ):  $\delta = 14.8$ ; HRMS (ESI): Exact mass calcd for  $\text{C}_{23}\text{H}_{27}\text{O}_6\text{P}$   $[\text{M}+\text{Na}]^+$ : 453.1437, Found: 453.1432.

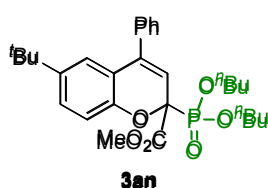

Column chromatography afforded **3an** in 90% yield (138.9 mg) as yellow oil;

$^1\text{H}$  NMR (600 MHz,  $\text{CDCl}_3$ ):  $\delta = 7.44$ -7.37 (m, 5H), 7.22 (dd,  $J = 8.4$  Hz, 2.4 Hz, 1H), 7.02 (d,  $J = 2.4$  Hz, 1H), 6.98 (d,  $J = 8.4$  Hz, 1H), 5.98 (d,  $J = 6.0$  Hz,

1H), 4.22-4.16 (m, 2H), 4.14-4.07 (m, 2H), 3.86 (s, 3H), 1.61-1.52 (m, 4H), 1.36-1.31 (m, 2H), 1.31-1.26 (m, 2H), 1.18 (s, 9H), 0.88 (t,  $J = 7.2$  Hz, 3H), 0.85 (t,  $J = 7.2$  Hz, 3H);  $^{13}\text{C}\{^1\text{H}\}$  NMR (150 MHz,  $\text{CDCl}_3$ ):  $\delta = 167.9$  (d,  $J_{\text{C-P}} = 3.0$  Hz), 150.3 (d,  $J_{\text{C-P}} = 7.5$  Hz), 144.4, 138.1 (d,  $J_{\text{C-P}} = 10.5$  Hz), 137.1 (d,  $J_{\text{C-P}} = 1.5$  Hz), 128.5 (d,  $J_{\text{C-P}} = 1.5$  Hz), 128.4, 128.2, 127.0, 122.9, 119.6 (d,  $J_{\text{C-P}} = 3.0$  Hz), 116.7 (d,  $J_{\text{C-P}} = 6.0$  Hz), 115.8, 81.8 (d,  $J_{\text{C-P}} = 160.5$  Hz), 68.05, 68.01, 67.93, 67.88, 53.3, 34.2, 32.41, 32.37, 31.3, 18.51, 18.50, 13.5;  $^{31}\text{P}\{^1\text{H}\}$  NMR (243 MHz,  $\text{CDCl}_3$ ):  $\delta = 12.3$ ; HRMS (ESI): Exact mass calcd for  $\text{C}_{29}\text{H}_{39}\text{O}_6\text{P}$  [M-H] $^-$ : 513.2411, Found: 513.2417.

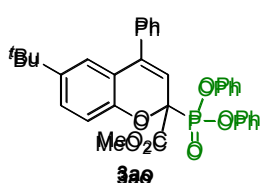

Column chromatography afforded **3ao** in 91% yield (151.4 mg) as yellow oil;  $^1\text{H}$  NMR (600 MHz,  $\text{CDCl}_3$ ):  $\delta = 7.39$ -7.38 (m, 2H), 7.32-7.29 (m, 2H), 7.24-7.22 (m, 5H), 7.20-7.16 (m, 3H), 7.12-7.09 (m, 1H), 7.05-7.04 (m, 2H), 6.98 (d,  $J = 2.4$  Hz, 1H), 6.94 (d,  $J = 8.4$  Hz, 1H), 6.89-6.80 (m, 1H), 6.00 (d,  $J = 6.0$  Hz, 1H),

3.83 (s, 3H), 1.19 (s, 9H);  $^{13}\text{C}\{^1\text{H}\}$  NMR (150 MHz,  $\text{CDCl}_3$ ):  $\delta = 167.0$  (d,  $J_{\text{C-P}} = 6.0$  Hz), 156.0, 150.7 (d,  $J_{\text{C-P}} = 10.5$  Hz), 150.4 (d,  $J_{\text{C-P}} = 10.5$  Hz), 150.0 (d,  $J_{\text{C-P}} = 4.5$  Hz), 144.8, 139.5 (d,  $J_{\text{C-P}} = 10.5$  Hz), 136.8, 129.5 (d,  $J_{\text{C-P}} = 19.5$  Hz), 129.4, 128.5 (d,  $J_{\text{C-P}} = 1.5$  Hz), 128.37, 128.35, 127.4, 125.3 (d,  $J_{\text{C-P}} = 27.0$  Hz), 123.2, 120.5 (d,  $J_{\text{C-P}} = 4.5$  Hz), 120.2 (d,  $J_{\text{C-P}} = 4.5$  Hz), 119.2 (d,  $J_{\text{C-P}} = 3.0$  Hz), 115.6 (d,  $J_{\text{C-P}} = 81.0$  Hz), 114.9 (d,  $J_{\text{C-P}} = 7.5$  Hz), 82.0 (d,  $J_{\text{C-P}} = 165.0$  Hz), 53.6, 34.2, 31.3;  $^{31}\text{P}\{^1\text{H}\}$  NMR (243 MHz,  $\text{CDCl}_3$ ):  $\delta = 3.8$ ; HRMS (ESI): Exact mass calcd for  $\text{C}_{33}\text{H}_{31}\text{O}_6\text{P}$  [M-H] $^-$ : 553.1785, Found: 553.1792.

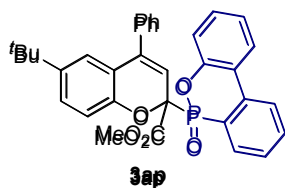

Column chromatography **3ap** in 98% yield (157.7 mg) as white solid; Mp: 58-60  $^\circ\text{C}$ ;  $^1\text{H}$  NMR (600 MHz,  $\text{CDCl}_3$ ):  $\delta = 8.02$ -7.99 (m, 1H), 7.80-7.78 (m, 2H), 7.53 (t,  $J = 7.8$  Hz, 1H), 7.36-7.32 (m, 4H), 7.29-7.28 (m, 1H), 7.22-7.19 (m, 1H), 7.15-7.13 (m, 2H), 6.96 (dd,  $J = 8.4$  Hz, 2.4 Hz, 1H), 6.93 (d,  $J = 7.8$

Hz, 1H), 6.62 (d,  $J = 1.8$  Hz, 1H), 6.29 (d,  $J = 8.4$  Hz, 1H), 5.92 (d,  $J = 4.2$  Hz, 1H), 3.93 (s, 3H), 1.10 (s, 9H);  $^{13}\text{C}\{^1\text{H}\}$  NMR (150 MHz,  $\text{CDCl}_3$ ):  $\delta = 166.7$ , 150.8 (d,  $J_{\text{C-P}} = 9.0$  Hz), 149.5 (d,  $J_{\text{C-P}} = 1.5$  Hz), 144.2, 139.7 (d,  $J_{\text{C-P}} = 10.5$  Hz), 136.7 (d,  $J_{\text{C-P}} = 3.0$  Hz), 134.2 (d,  $J_{\text{C-P}} = 1.5$  Hz), 132.9 (d,  $J_{\text{C-P}} = 9.0$  Hz), 130.5, 128.3, 128.2 (d,  $J_{\text{C-P}} = 3.0$  Hz), 127.7 (d,  $J_{\text{C-P}} = 13.5$  Hz), 126.8, 124.4 (d,  $J_{\text{C-P}} = 75.0$  Hz), 122.8 (d,  $J_{\text{C-P}} = 10.5$  Hz), 122.6, 121.2 (d,  $J_{\text{C-P}} = 10.5$  Hz), 120.7 (d,  $J_{\text{C-P}} = 114.0$  Hz), 119.9 (d,  $J_{\text{C-P}} = 6.0$  Hz), 119.1 (d,  $J_{\text{C-P}} = 3.0$  Hz), 85.0 (d,  $J_{\text{C-P}} = 103.5$  Hz), 53.5, 34.0, 31.2;  $^{31}\text{P}\{^1\text{H}\}$  NMR (243 MHz,  $\text{CDCl}_3$ ):  $\delta = 24.4$ ; HRMS (ESI): Exact mass calcd for  $\text{C}_{33}\text{H}_{29}\text{O}_5\text{P}$  [M+Na] $^+$ : 559.1645, Found: 559.1649.

### 3. Gram-scale synthesis and product elaboration

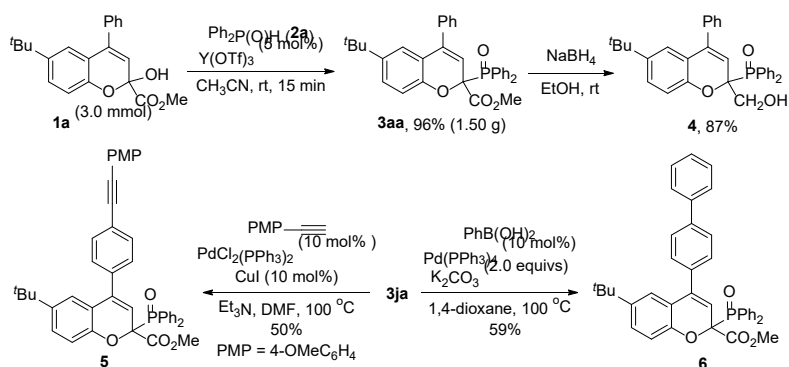

#### 3.1 Gram-scale synthesis

The gram-scale reaction was carried out under an air atmosphere. To a 100 mL three-necked flask were added **1a** (1.01 g, 3.0 mmol, 1.0 equiv),  $\text{Ph}_2\text{P}(\text{O})\text{H}$  **2a** (0.73 g, 3.6 mmol, 1.2 equivs) and 30.0 mL of anhydrous  $\text{CH}_3\text{CN}$ . After adding  $\text{Y}(\text{OTf})_3$  (80 mg, 5 mol%), the reaction mixture was stirred at room temperature till almost full conversion of **1a** by TLC analysis. The reaction mixture was directly subjected to column chromatography using dichloromethane/ethyl acetate (generally 30:1 to 20:1, v:v) as the eluent to afford the desired products **3aa** in 96% yield (1.50 g).

#### 3.2 Product elaboration

##### 1) The synthesis of **4**

To a 10-mL vial were added sequentially **3aa** (52.0 mg, 0.1 mmol),  $\text{NaBH}_4$  (56.7 mg, 1.5 mmol, 15 equivs) and 2.0 mL of ethanol. The reaction mixture was stirred at room temperature till almost full conversion of **3aa** by TLC analysis. After removing the solvent  $\text{EtOH}$ , 10 mL  $\text{H}_2\text{O}$  was added to the mixture. The organic layer was extracted with ethyl acetate ( $3 \times 10$  mL) and then dried with  $\text{Na}_2\text{SO}_4$ . After removing the solvent, the residue was then subjected to column chromatography using dichloromethane/ethyl acetate (generally 6:1, v:v) as the eluent to afford the desired product **4** in 87% yield (43.0 mg) as white solid. Mp:  $161\text{-}163^\circ\text{C}$ ;  $^1\text{H}$  NMR (600 MHz,  $\text{CDCl}_3$ ):  $\delta = 8.21\text{-}8.18$  (m, 2H), 7.71-7.68 (m, 2H), 7.61-7.59 (m, 1H), 7.57-7.54 (m, 2H), 7.38-7.33 (m, 3H), 7.25-7.22 (m, 3H), 7.16-7.13 (m, 2H), 7.09 (dd,  $J = 8.4$  Hz, 2.4 Hz, 1H), 6.78 (d,  $J = 8.4$  Hz, 1H), 6.63 (d,  $J = 1.8$  Hz, 1H), 6.09 (d,  $J = 2.4$  Hz, 1H), 4.19 (dd,  $J = 11.4$  Hz, 8.4 Hz, 1H), 4.06-4.02 (m, 1H), 3.34 (brs, 1H), 1.11 (s, 9H);  $^{13}\text{C}\{^1\text{H}\}$  NMR (150 MHz,  $\text{CDCl}_3$ ):  $\delta = 150.2, 144.2, 139.8, 137.4, 132.4$  (d,  $J_{\text{C-P}} = 7.5$  Hz), 132.08 (d,  $J_{\text{C-P}} = 61.5$  Hz), 132.06 (d,  $J_{\text{C-P}} = 9.0$  Hz), 129.86 (d,  $J_{\text{C-P}} = 93.0$  Hz), 129.1 (d,  $J_{\text{C-P}} = 90.0$  Hz), 128.5 (d,  $J_{\text{C-P}} = 12.0$  Hz), 128.4, 128.3, 128.1, 127.6 (d,  $J_{\text{C-P}} = 12.0$  Hz), 126.5, 123.0, 120.8, 118.8, 114.8, 82.1 (d,  $J_{\text{C-P}} = 81.0$  Hz), 65.9, 65.8, 34.1, 31.2;  $^{31}\text{P}\{^1\text{H}\}$  NMR (243 MHz,  $\text{CDCl}_3$ ):  $\delta = 31.0$ ; HRMS (ESI):

Exact mass calcd for C<sub>32</sub>H<sub>31</sub>O<sub>3</sub>P [M+Na]<sup>+</sup>: 517.1903, Found: 517.1905.

## 2) Sonogashira coupling reaction

Compound **5** was prepared from **3ja** (60.1 mg, 0.1 mmol) and 1-ethynyl-4-methoxybenzene (39.6 mg, 0.3 mmol) according to the literature procedure.<sup>2</sup> Column chromatography afforded the desired product **5** in 50% yield (32.6 mg) as brown solid. Mp: 57-59 °C; <sup>1</sup>H NMR (400 MHz, CDCl<sub>3</sub>): δ = 8.21-8.15 (m, 2H), 7.82-7.77 (m, 2H), 7.63-7.54 (m, 5H), 7.51-7.46 (m, 2H), 7.34-7.29 (m, 3H), 7.25-7.21 (m, 2H), 7.07 (dd, *J* = 8.8 Hz, 2.4 Hz, 1H), 6.91-6.88 (m, 2H), 6.80-6.77 (m, 2H), 6.31 (d, *J* = 5.2 Hz, 1H), 3.83 (s, 3H), 3.60 (s, 3H), 1.12 (s, 9H); <sup>13</sup>C{<sup>1</sup>H} NMR (100 MHz, CDCl<sub>3</sub>): δ = 167.9 (d, *J*<sub>C-P</sub> = 4.0 Hz), 159.7, 149.9 (d, *J*<sub>C-P</sub> = 5.0 Hz), 144.4, 138.3 (d, *J*<sub>C-P</sub> = 8.0 Hz), 136.5, 133.1, 132.6 (d, *J*<sub>C-P</sub> = 9.0 Hz), 132.55, 132.2 (d, *J*<sub>C-P</sub> = 9.0 Hz), 132.1 (d, *J*<sub>C-P</sub> = 3.0 Hz), 132.0, 131.4, 130.0 (d, *J*<sub>C-P</sub> = 10.0 Hz), 128.5 (d, *J*<sub>C-P</sub> = 2.0 Hz), 128.48 (d, *J*<sub>C-P</sub> = 95.0 Hz), 128.4 (d, *J*<sub>C-P</sub> = 9.0 Hz), 127.9 (d, *J*<sub>C-P</sub> = 12.0 Hz), 127.0, 123.6, 122.7, 119.1 (d, *J*<sub>C-P</sub> = 3.0 Hz), 116.6 (d, *J*<sub>C-P</sub> = 4.0 Hz), 115.4 (d, *J*<sub>C-P</sub> = 45.0 Hz), 114.0, 90.4, 87.7, 84.5 (d, *J*<sub>C-P</sub> = 77.0 Hz), 55.3, 53.0, 34.1, 31.2; <sup>31</sup>P{<sup>1</sup>H} NMR (162 MHz, CDCl<sub>3</sub>): δ = 28.1; HRMS (ESI): Exact mass calcd for C<sub>42</sub>H<sub>37</sub>O<sub>5</sub>P [M+Na]<sup>+</sup>: 675.2271, Found: 675.2269.

## 3) Suzuki coupling reaction

Compound **6** was prepared from **3ja** (60.1 mg, 0.1 mmol) and phenylboronic acid (24.4 mg, 0.2 mmol) according to the literature procedure.<sup>3</sup> Column chromatography afforded **6** in 59% yield (35.3 mg) as white solid. Mp: 50-52 °C; <sup>1</sup>H NMR (400 MHz, CDCl<sub>3</sub>): δ = 8.22-8.17 (m, 2H), 7.84-7.79 (m, 2H), 7.67-7.65 (m, 4H), 7.62-7.56 (m, 3H), 7.49-7.45 (m, 2H), 7.43-7.37 (m, 3H), 7.33-7.31 (m, 1H), 7.26-7.23 (m, 2H), 7.08 (dd, *J* = 8.4 Hz, 2.4 Hz, 1H), 6.90 (d, *J* = 2.4 Hz, 1H), 6.80 (d, *J* = 8.4 Hz, 1H), 6.34 (d, *J* = 5.2 Hz, 1H), 3.61 (s, 3H), 1.14 (s, 9H); <sup>13</sup>C{<sup>1</sup>H} NMR (150 MHz, CDCl<sub>3</sub>): δ = 168.0 (d, *J*<sub>C-P</sub> = 4.5 Hz), 150.0 (d, *J*<sub>C-P</sub> = 6.0 Hz), 144.4, 141.1, 140.5, 138.5 (d, *J*<sub>C-P</sub> = 9.0 Hz), 136.0, 132.7 (d, *J*<sub>C-P</sub> = 10.5 Hz), 132.6 (d, *J*<sub>C-P</sub> = 1.5 Hz), 132.2 (d, *J*<sub>C-P</sub> = 9.0 Hz), 129.8 (d, *J*<sub>C-P</sub> = 100.5 Hz), 129.0, 128.9, 128.5 (d, *J*<sub>C-P</sub> = 12.0 Hz), 128.4, 128.3 (d, *J*<sub>C-P</sub> = 10.5 Hz), 127.9 (d, *J*<sub>C-P</sub> = 12.0 Hz), 127.2 (d, *J*<sub>C-P</sub> = 91.5 Hz), 127.1 (d, *J*<sub>C-P</sub> = 1.5 Hz), 122.9, 119.3, 116.4 (d, *J*<sub>C-P</sub> = 3.0 Hz), 115.6, 84.6 (d, *J*<sub>C-P</sub> = 76.5 Hz), 53.0, 34.2, 31.3; <sup>31</sup>P{<sup>1</sup>H} NMR (243 MHz, CDCl<sub>3</sub>): δ = 28.1; HRMS (ESI): Exact mass calcd for C<sub>39</sub>H<sub>35</sub>O<sub>4</sub>P [M+Na]<sup>+</sup>: 621.2165, Found: 621.2166.

<sup>2</sup> Q.-Y. Chen and Z.-Y. Yang, *Tetrahedron Lett.* 1986, **27**, 1171.

<sup>3</sup> N. Eleya, A. Mahal, M. Hein, A. Villiger and P. Langer, *Adv. Synth. Catal.* 2011, **353**, 2761.

#### 4. X-ray Crystallographic Data of 3ca

Data intensity of **3ca** was collected on a 'XtaLAB Synergy R, DW system, HyPix' diffractometer at 299.51(12) K. Data collection and reduction were done by using Olex2 and the structure was solved with the ShelXT structure solution program using Intrinsic Phasing and refined with the ShelXL refinement package using Least Squares minimization. Hydrogen atoms were added at their geometrically ideal positions and refined isotropically. Crystal data for **3ca**: C<sub>30</sub>H<sub>25</sub>O<sub>5</sub>P,  $T = 299.51(12)$  K, monoclinic, space group P2<sub>1</sub>/c (no. 14),  $a = 9.32193(5)$  Å,  $b = 15.92387(9)$  Å,  $c = 17.03098(8)$  Å,  $\alpha = 90$  deg,  $\beta = 91.9636(4)$  deg,  $\gamma = 90$  deg,  $V = 2526.62(2)$  Å<sup>3</sup>.  $Z = 4$ ,  $d_{\text{calc}} = 1.305$  g/m<sup>3</sup>. 24076 reflections measured ( $7.602^\circ \leq 2\theta \leq 152.992^\circ$ ), 5125 unique [ $R_{\text{int}} = 0.0339$ ,  $R_{\text{sigma}} = 0.0208$ ] which were used in all calculations. The final  $R_1$  was 0.0398 ( $I > 2\sigma(I)$ ) and  $wR_2$  was 0.1095 (all data).

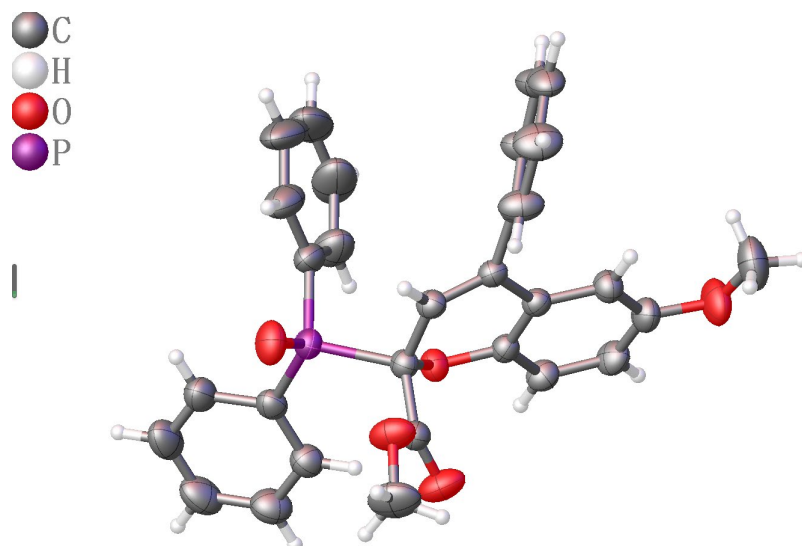

**Table S1. Crystal data and structure refinement for exp\_1147.**

|                     |                                                  |
|---------------------|--------------------------------------------------|
| Identification code | exp_1147                                         |
| Empirical formula   | C <sub>30</sub> H <sub>25</sub> O <sub>5</sub> P |
| Formula weight      | 496.47                                           |
| Temperature/K       | 299.51(12)                                       |
| Crystal system      | monoclinic                                       |
| Space group         | P2 <sub>1</sub> /c                               |
| $a/\text{Å}$        | 9.32193(5)                                       |
| $b/\text{Å}$        | 15.92387(9)                                      |
| $c/\text{Å}$        | 17.03098(8)                                      |
| $\alpha/^\circ$     | 90                                               |
| $\beta/^\circ$      | 91.9636(4)                                       |

---

|                                               |                                                               |
|-----------------------------------------------|---------------------------------------------------------------|
| $\gamma/^\circ$                               | 90                                                            |
| Volume/ $\text{\AA}^3$                        | 2526.62(2)                                                    |
| Z                                             | 4                                                             |
| $\rho_{\text{calc}}/\text{cm}^3$              | 1.305                                                         |
| $\mu/\text{mm}^{-1}$                          | 1.284                                                         |
| F(000)                                        | 1040.0                                                        |
| Crystal size/ $\text{mm}^3$                   | $0.13 \times 0.12 \times 0.12$                                |
| Radiation                                     | CuK $\alpha$ ( $\lambda = 1.54184$ )                          |
| $2\Theta$ range for data collection/ $^\circ$ | 7.602 to 152.992                                              |
| Index ranges                                  | $-11 \leq h \leq 11, -19 \leq k \leq 17, -21 \leq l \leq 19$  |
| Reflections collected                         | 24076                                                         |
| Independent reflections                       | 5125 [ $R_{\text{int}} = 0.0339, R_{\text{sigma}} = 0.0208$ ] |
| Data/restraints/parameters                    | 5125/0/327                                                    |
| Goodness-of-fit on $F^2$                      | 1.067                                                         |
| Final R indexes [ $I \geq 2\sigma(I)$ ]       | $R_1 = 0.0398, wR_2 = 0.1079$                                 |
| Final R indexes [all data]                    | $R_1 = 0.0417, wR_2 = 0.1095$                                 |
| Largest diff. peak/hole / $e \text{\AA}^{-3}$ | 0.19/-0.35                                                    |

---

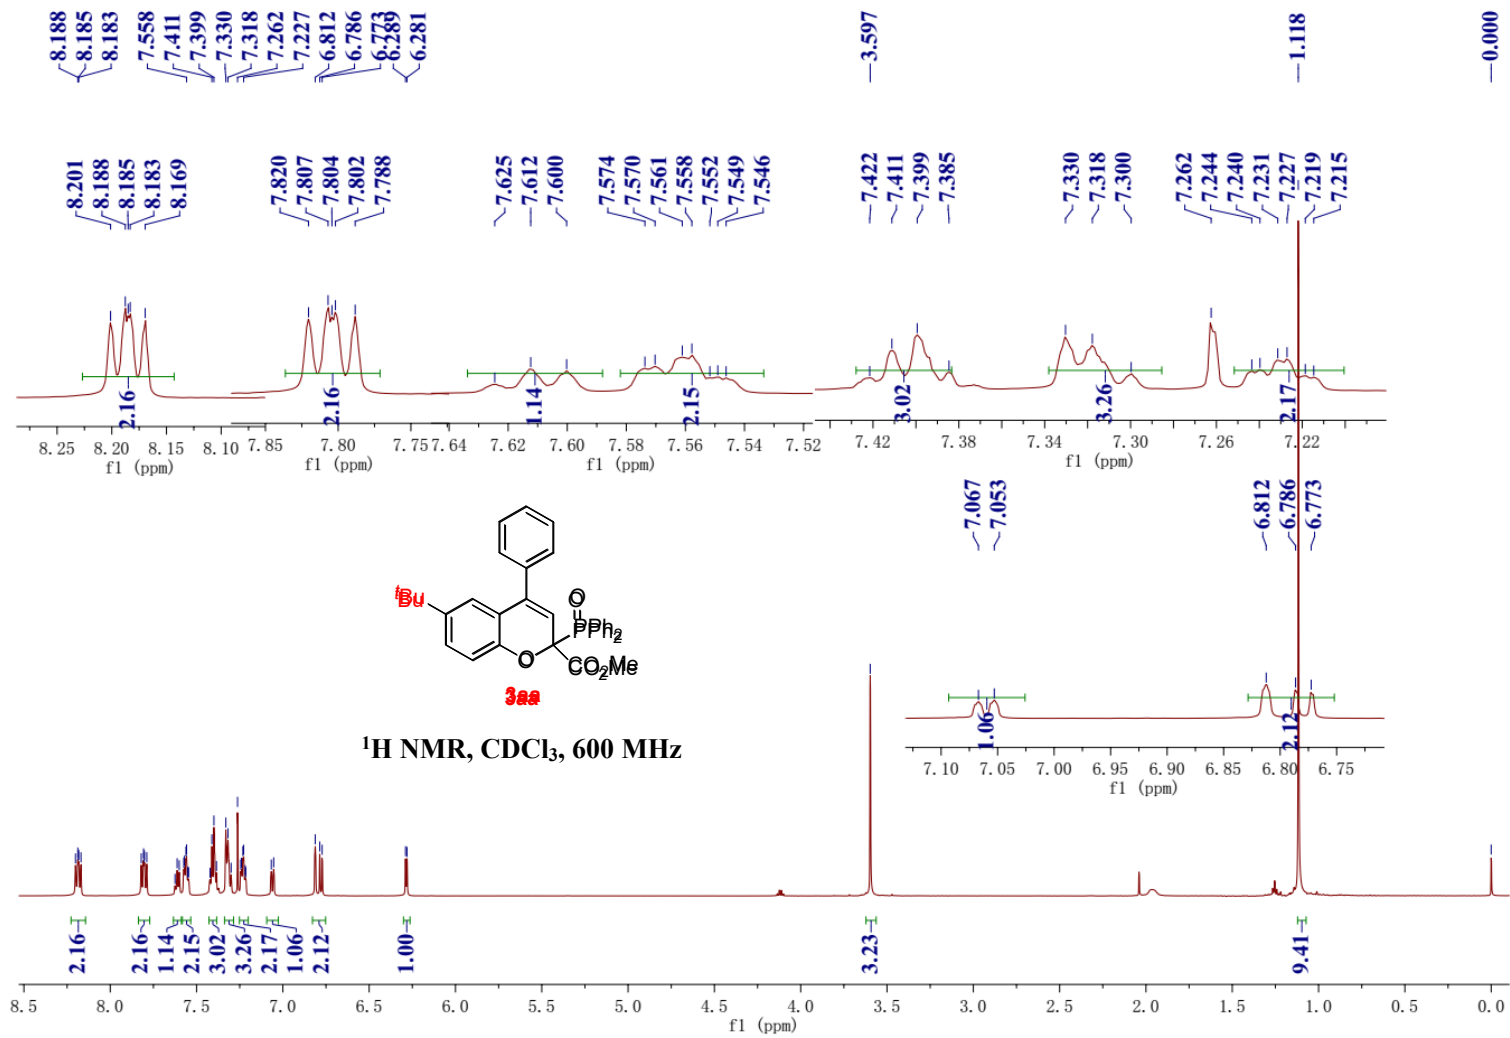

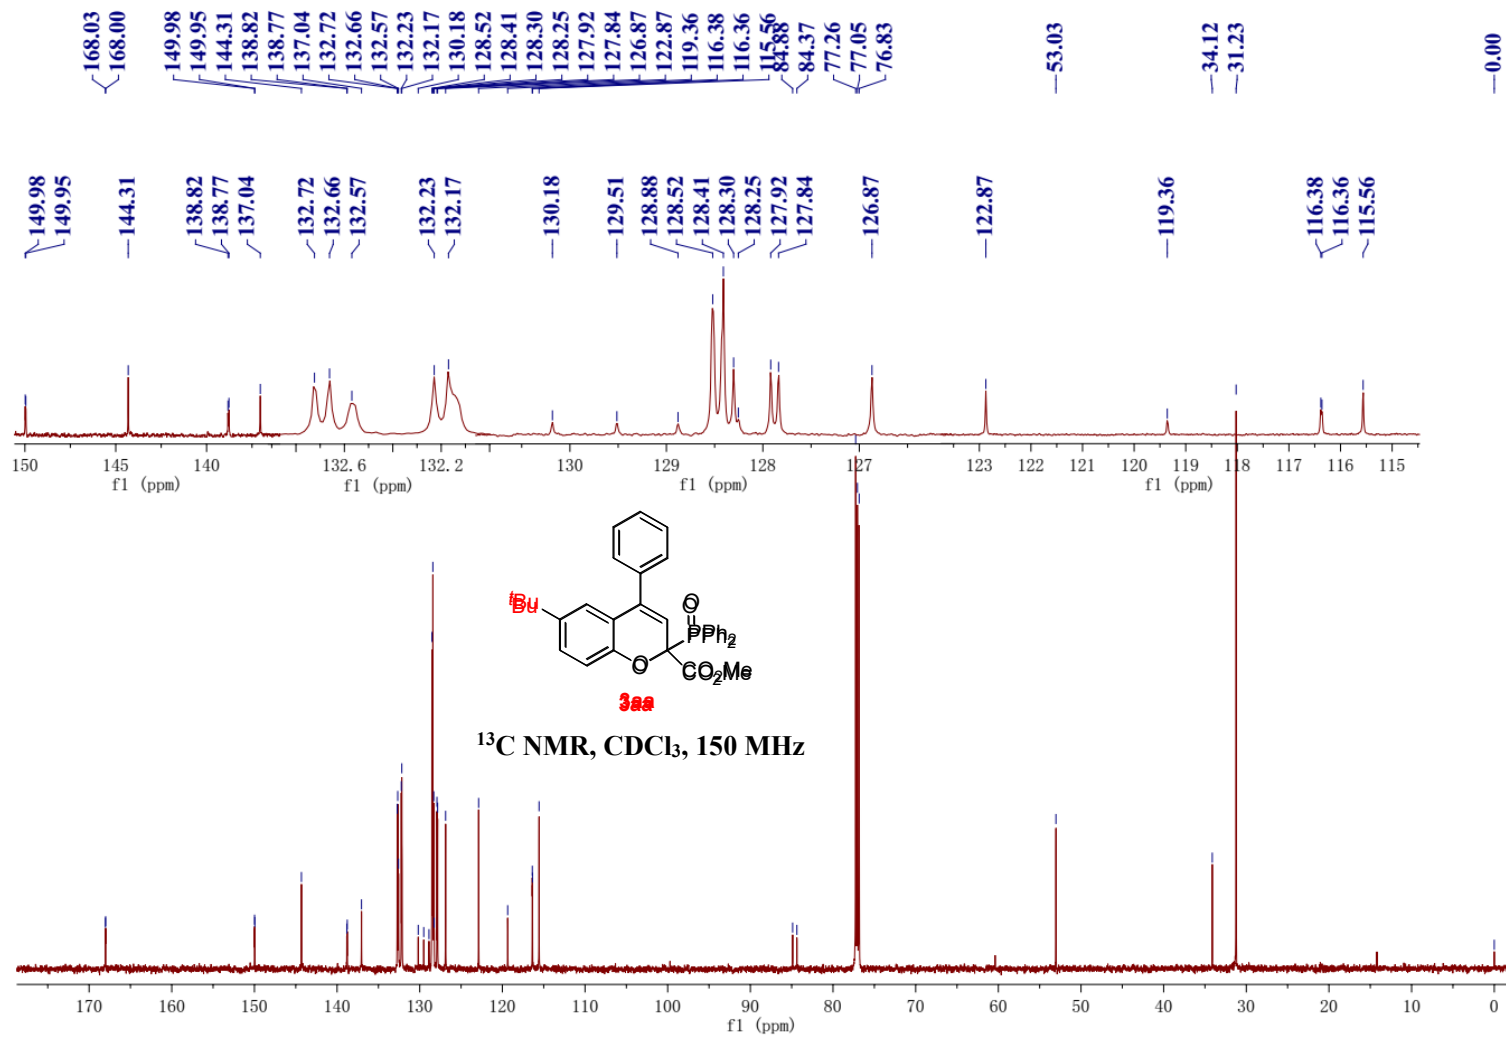



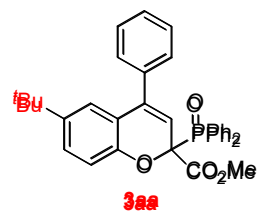

<sup>31</sup>P NMR, CDCl<sub>3</sub>, 243 MHz

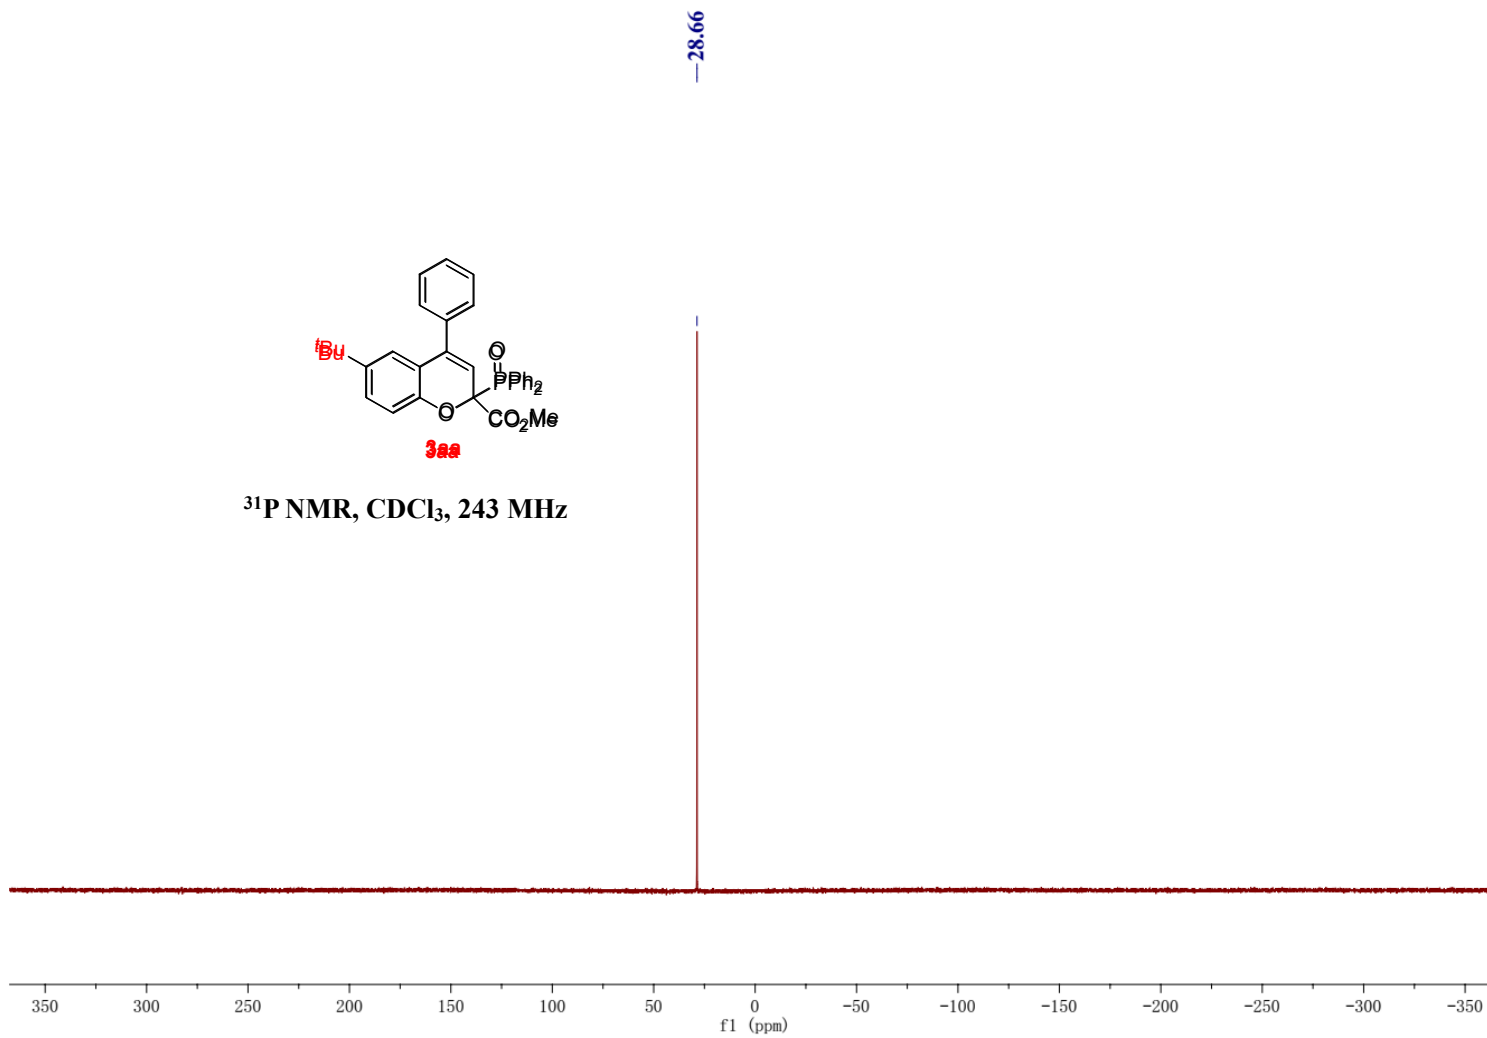

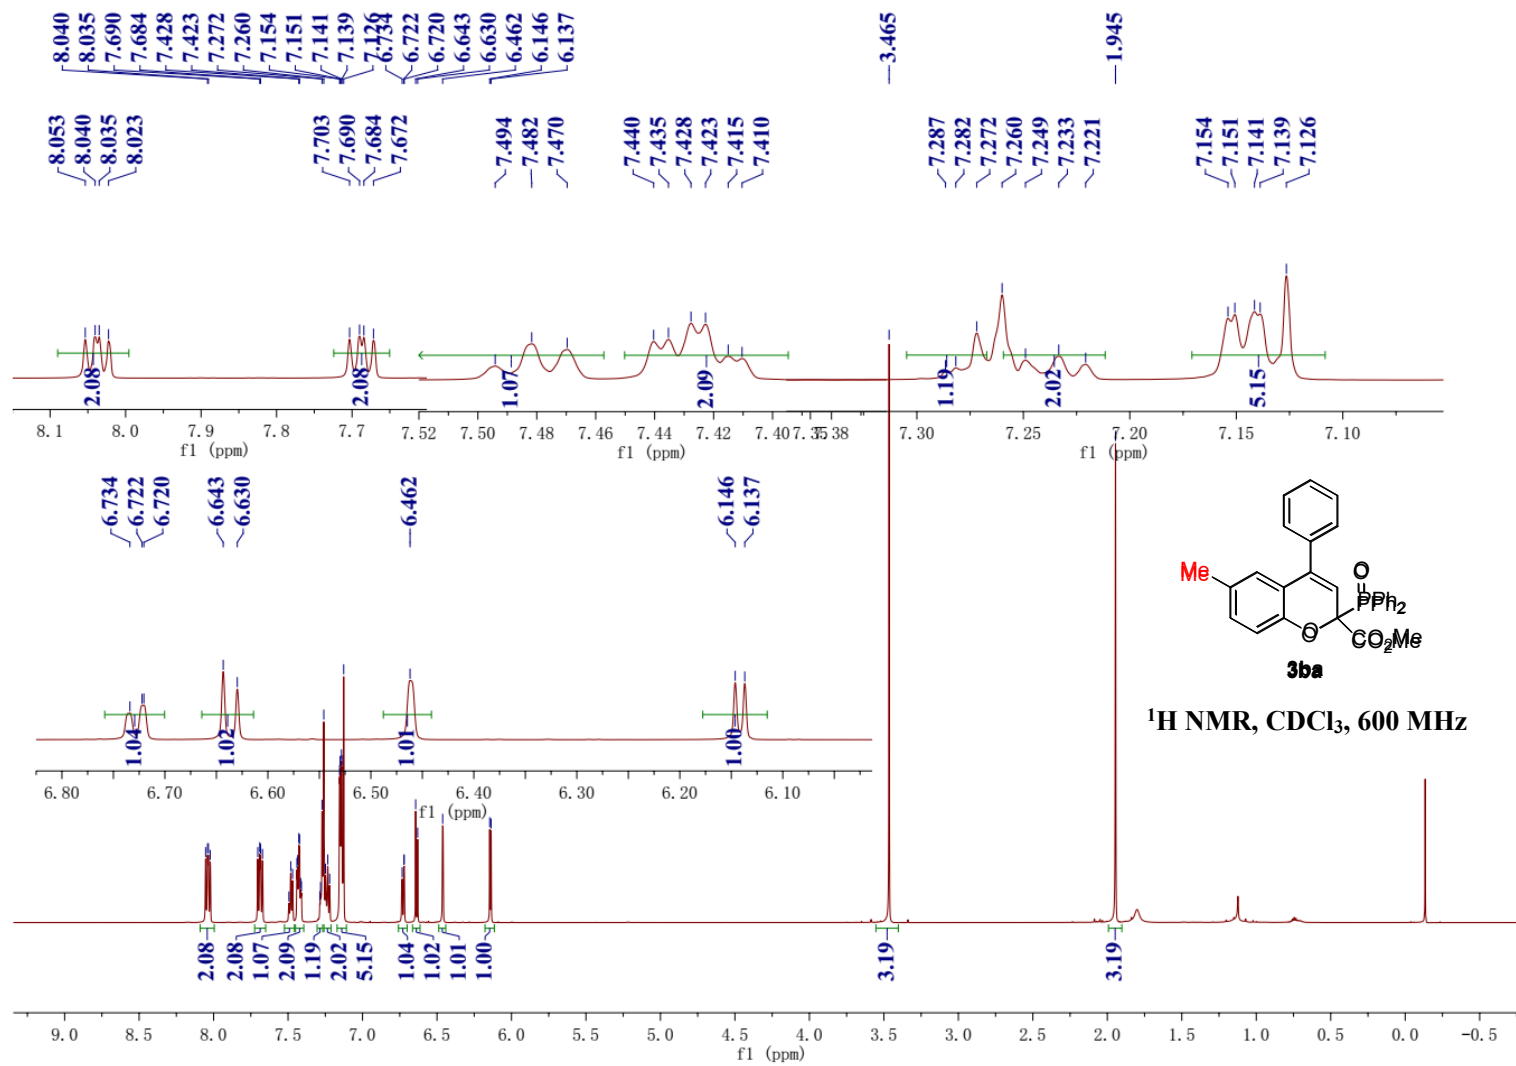

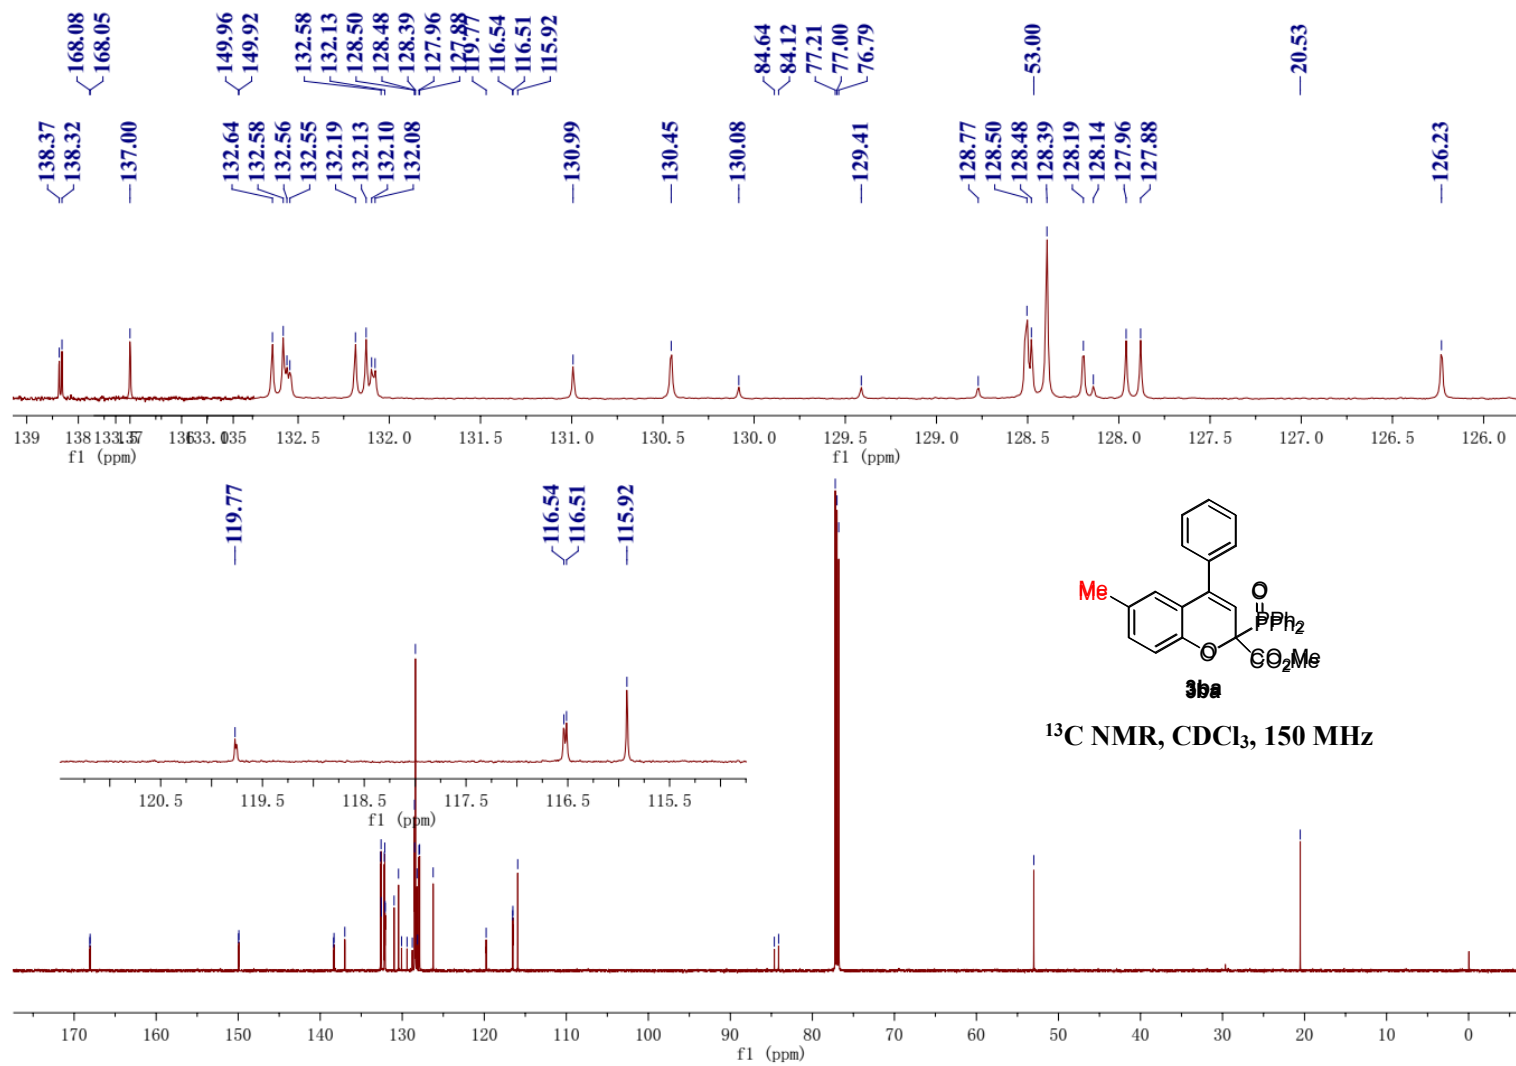

—28.43

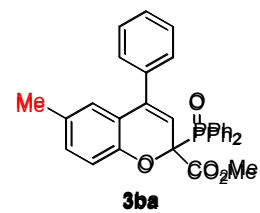

<sup>31</sup>P NMR, CDCl<sub>3</sub>, 243 MHz

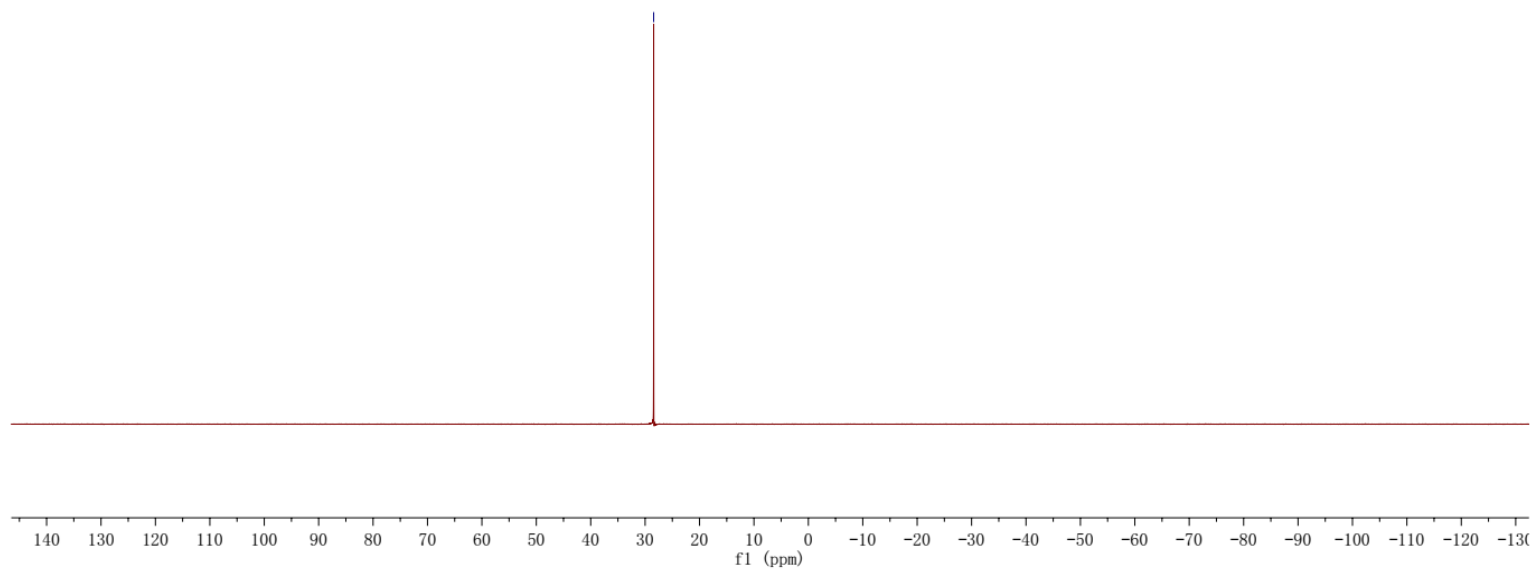

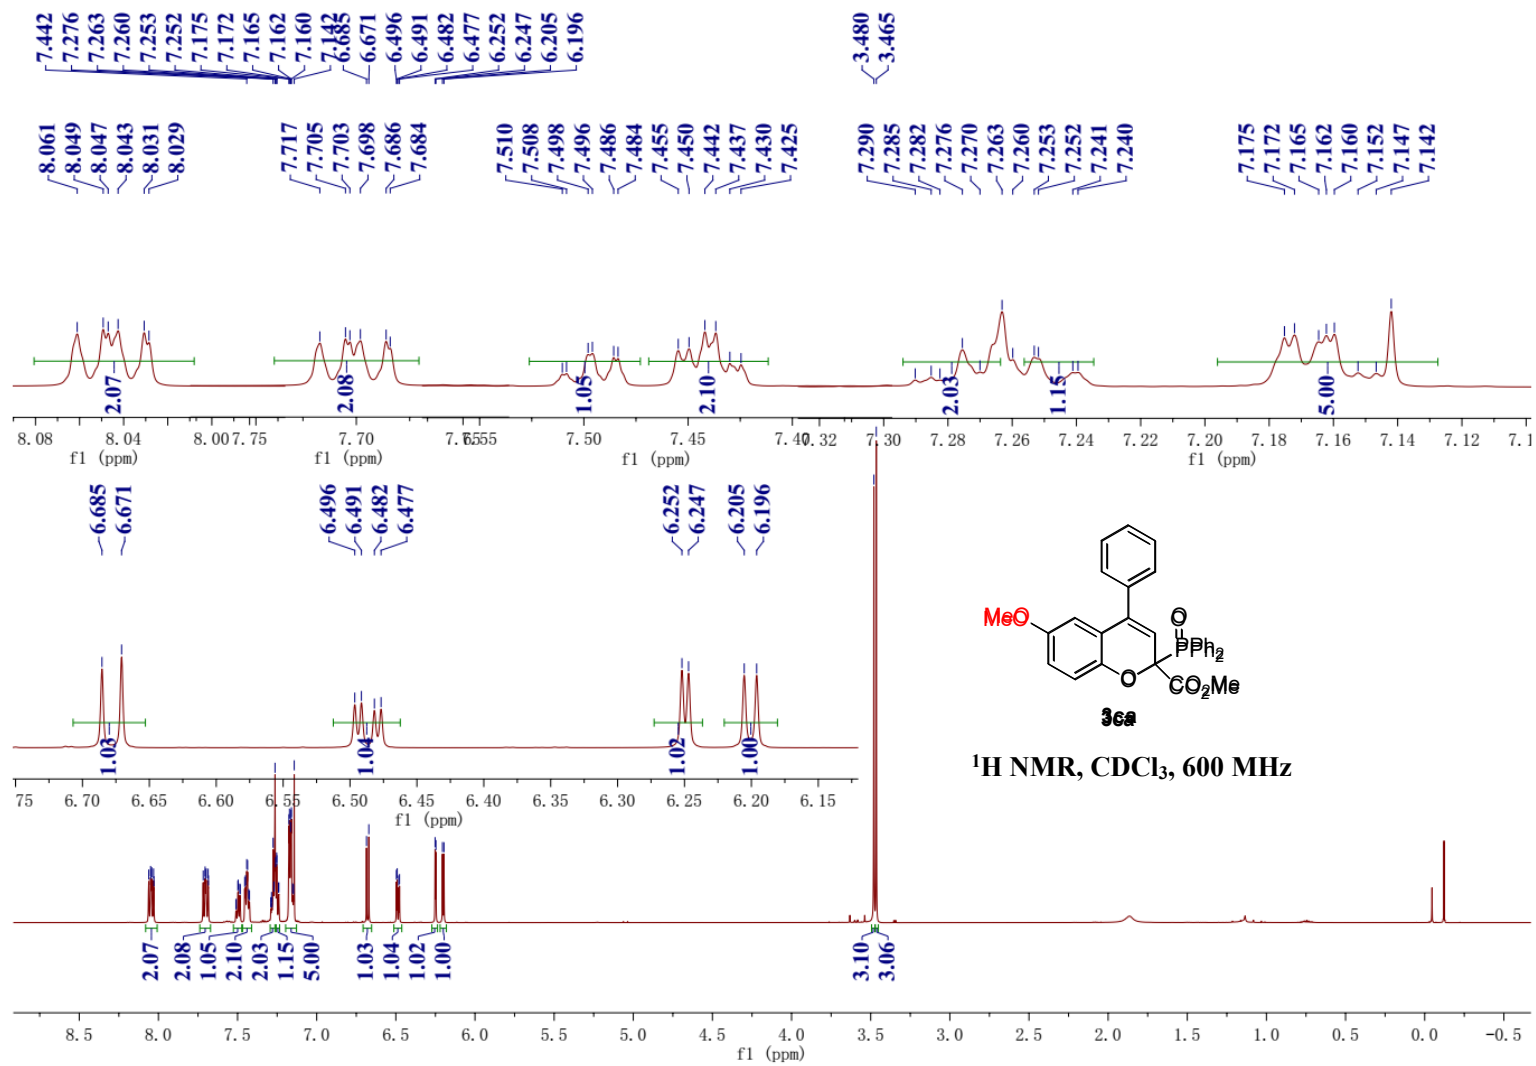

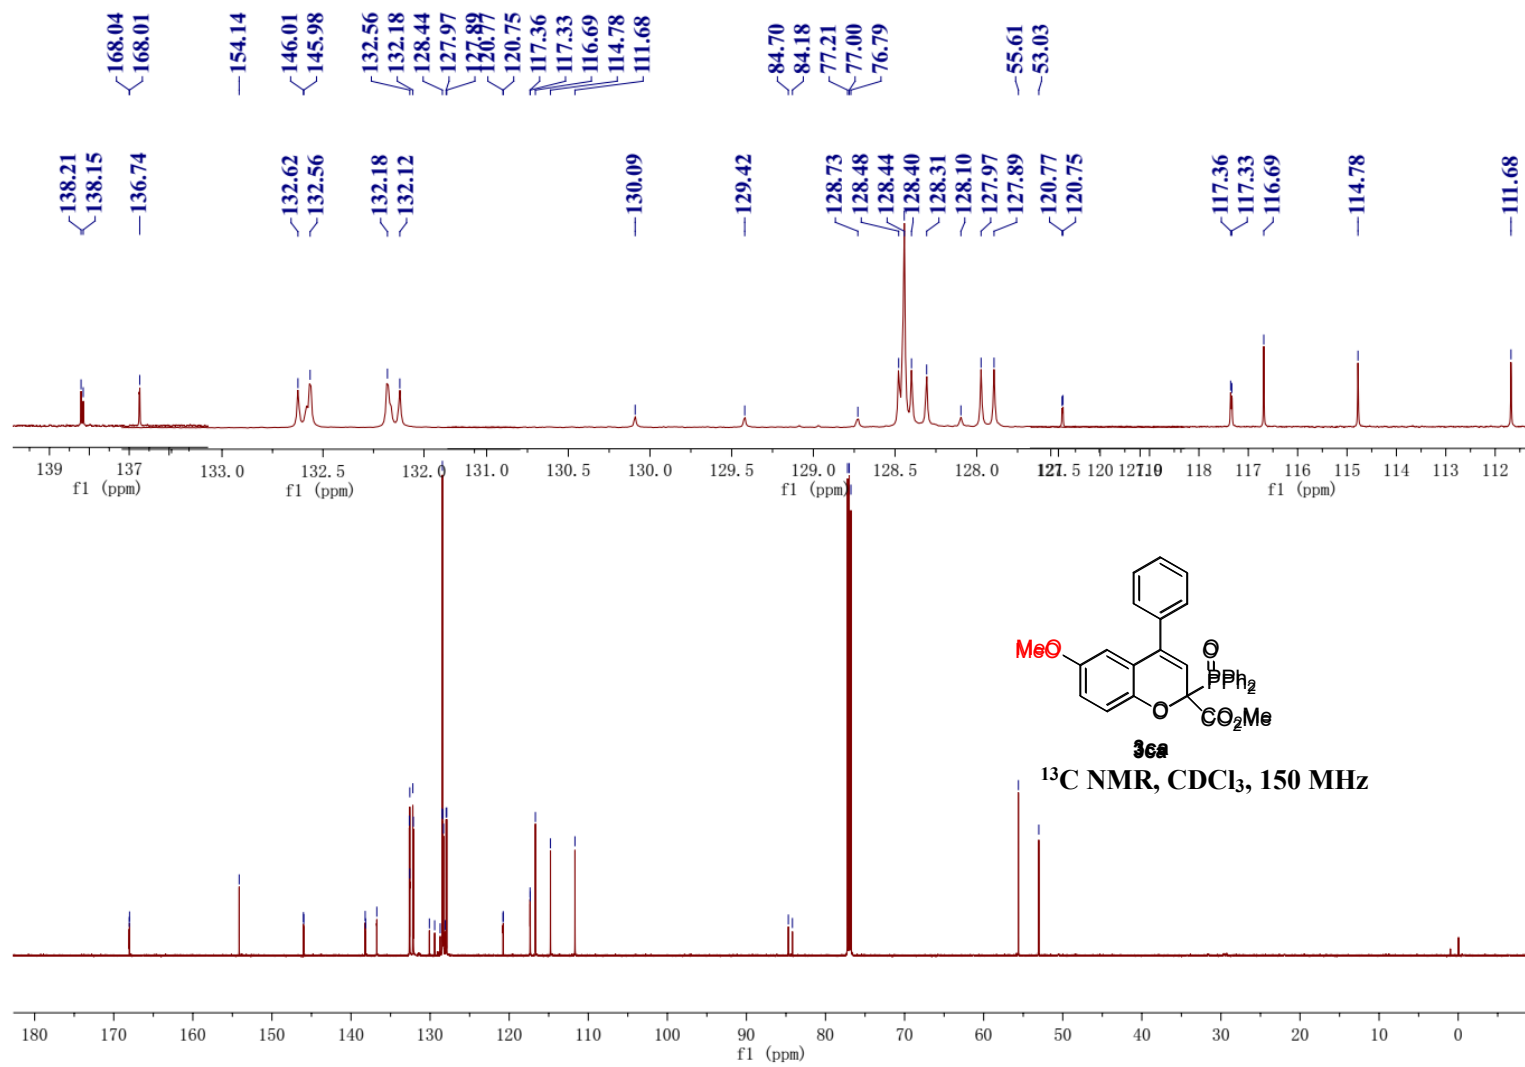

—28.41

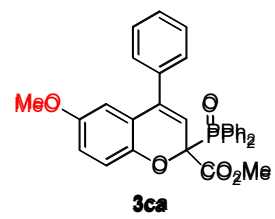

<sup>31</sup>P NMR, CDCl<sub>3</sub>, 243 MHz

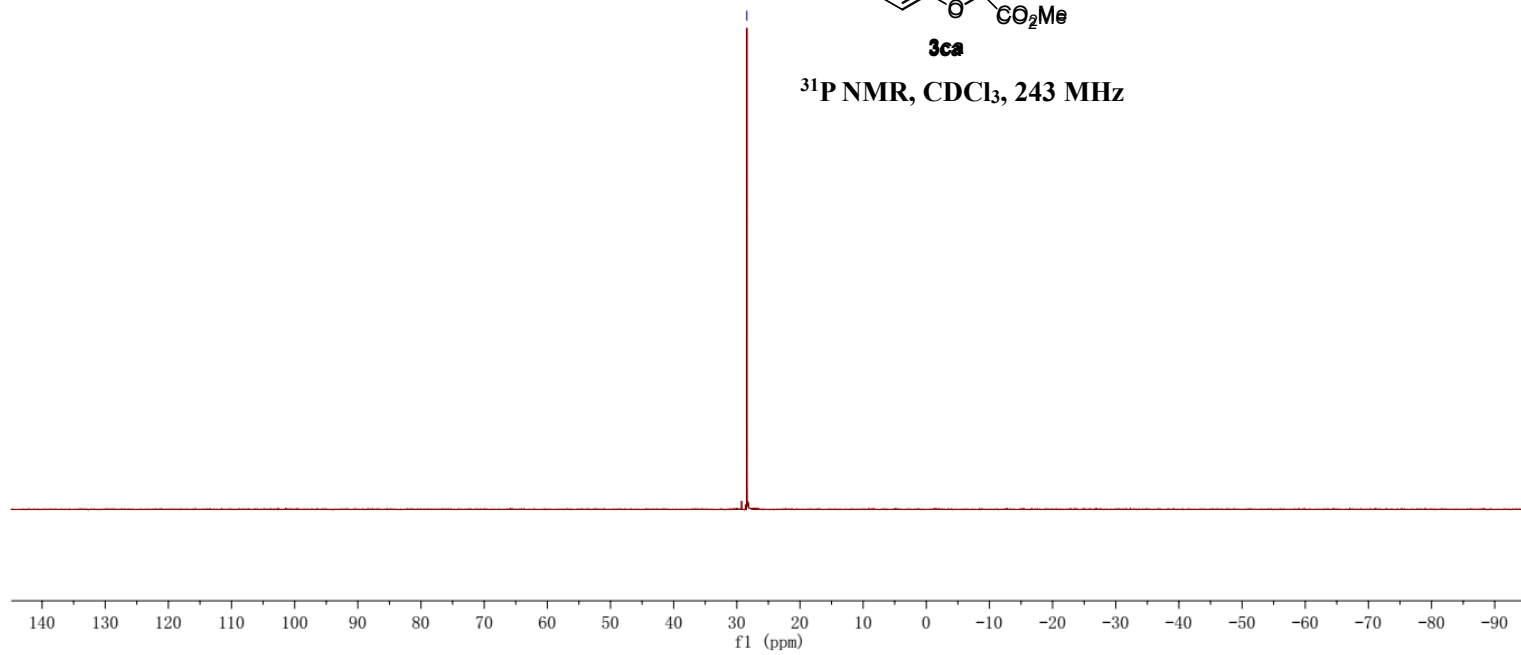

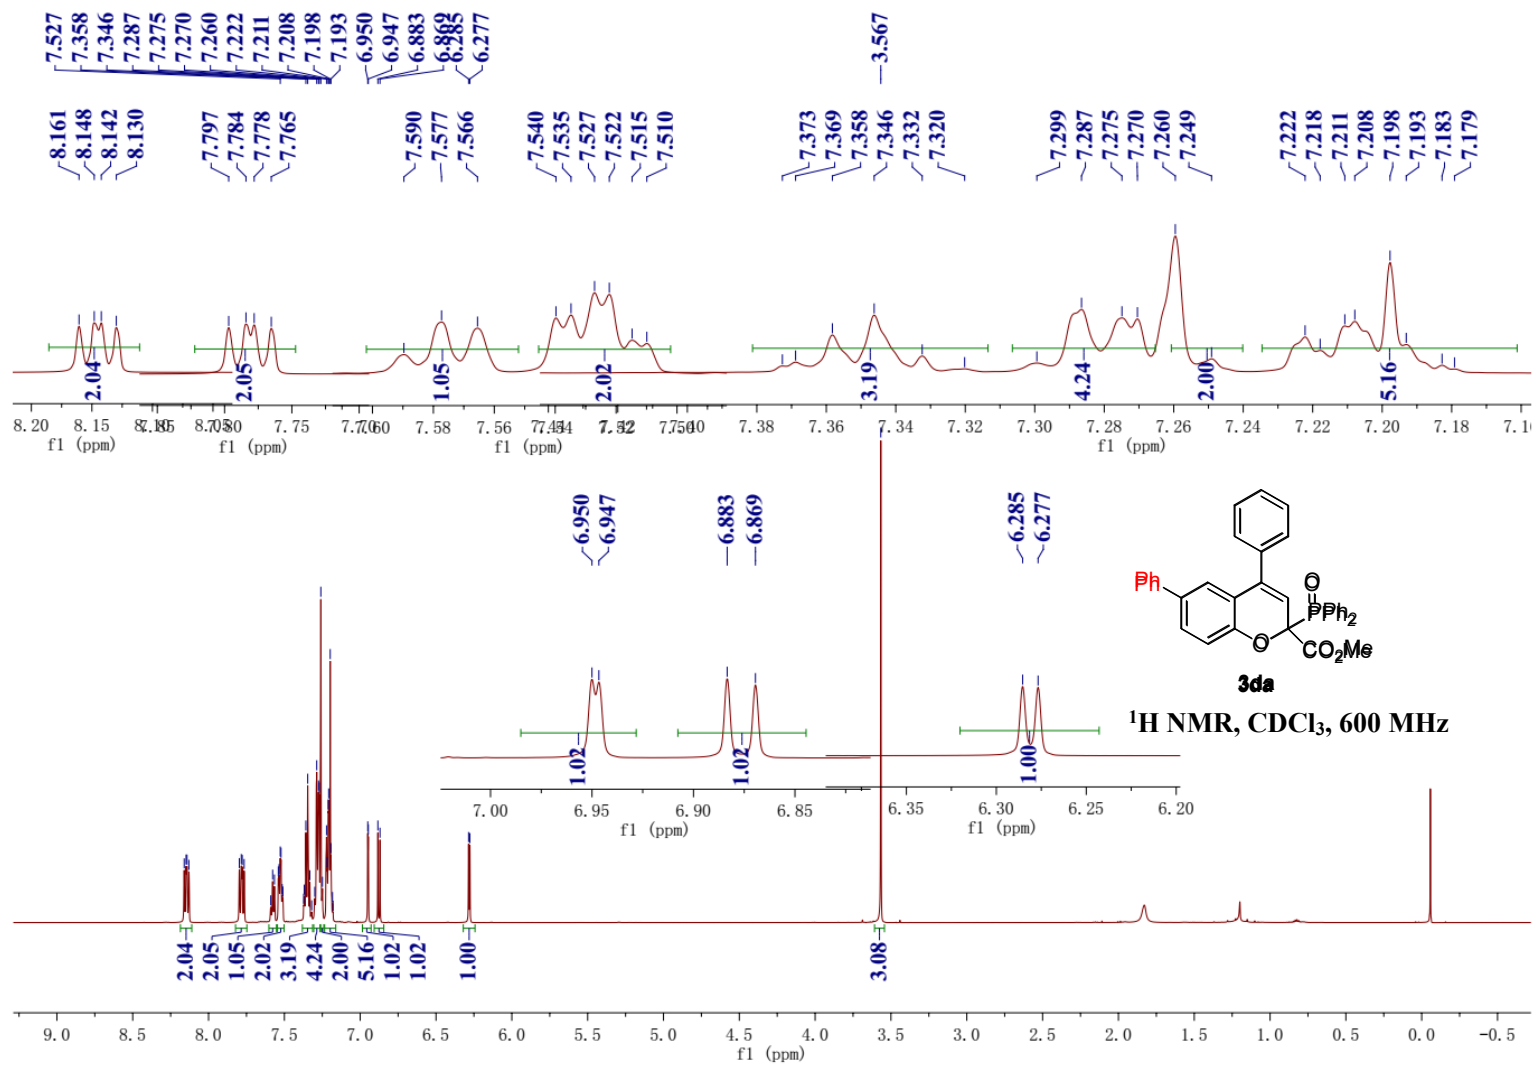



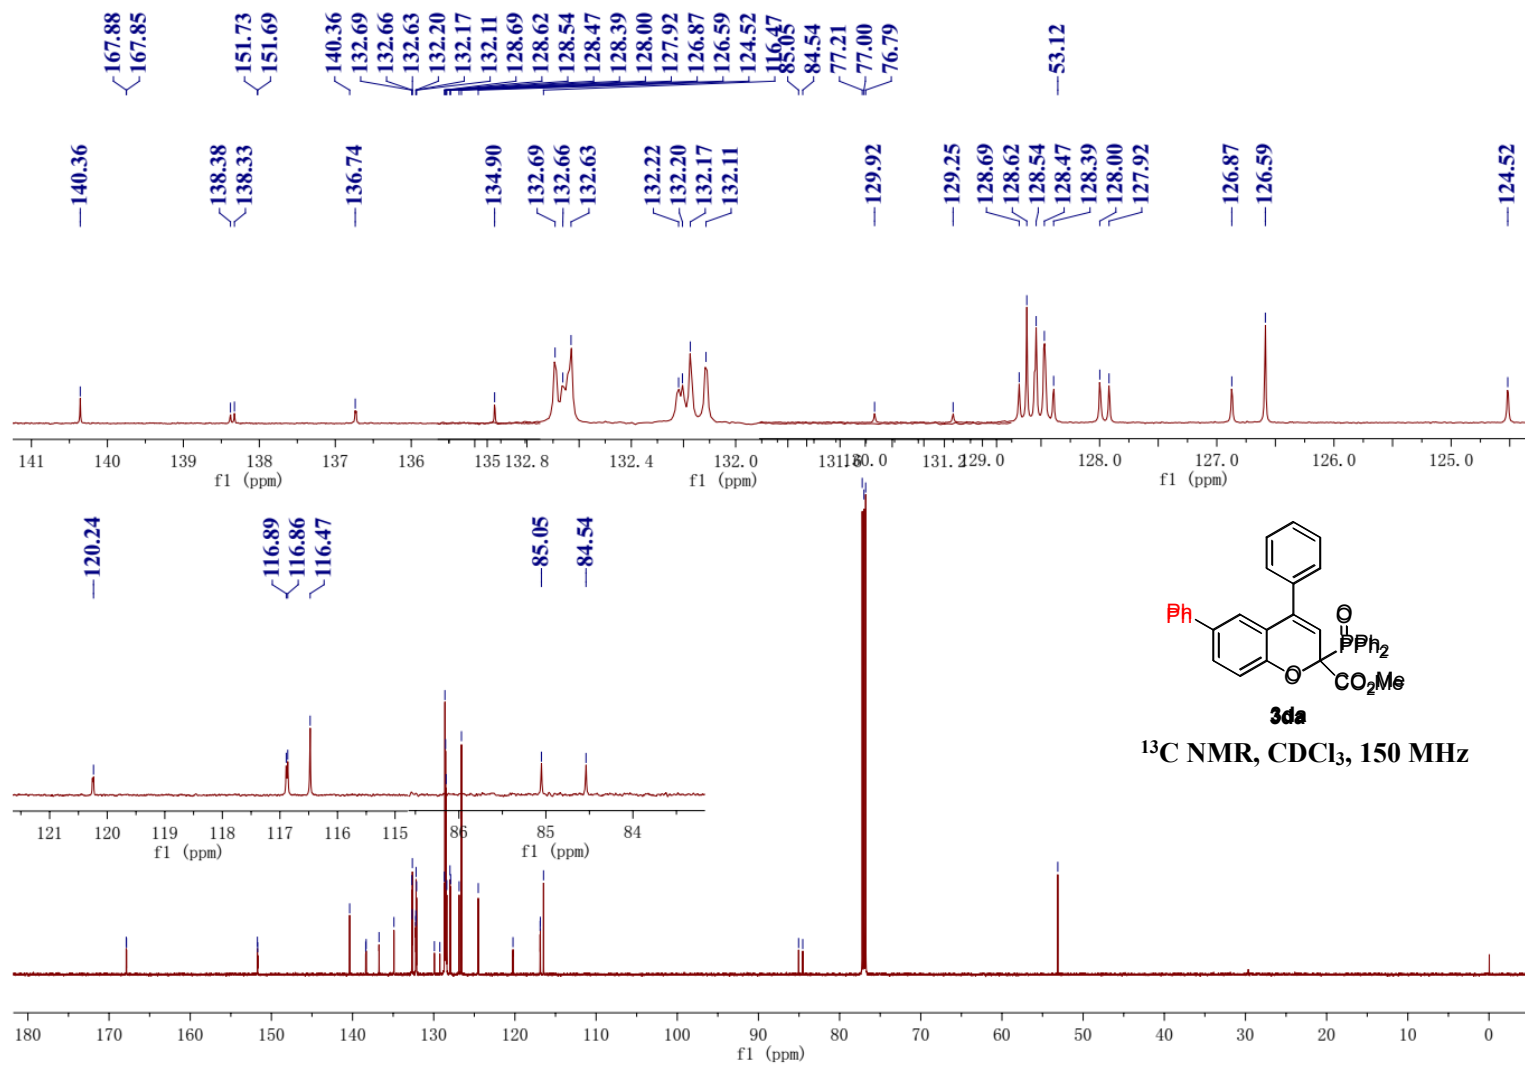

—28.28

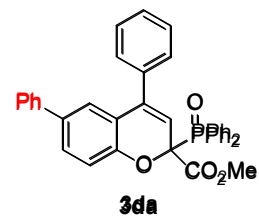

<sup>31</sup>P NMR, CDCl<sub>3</sub>, 243 MHz

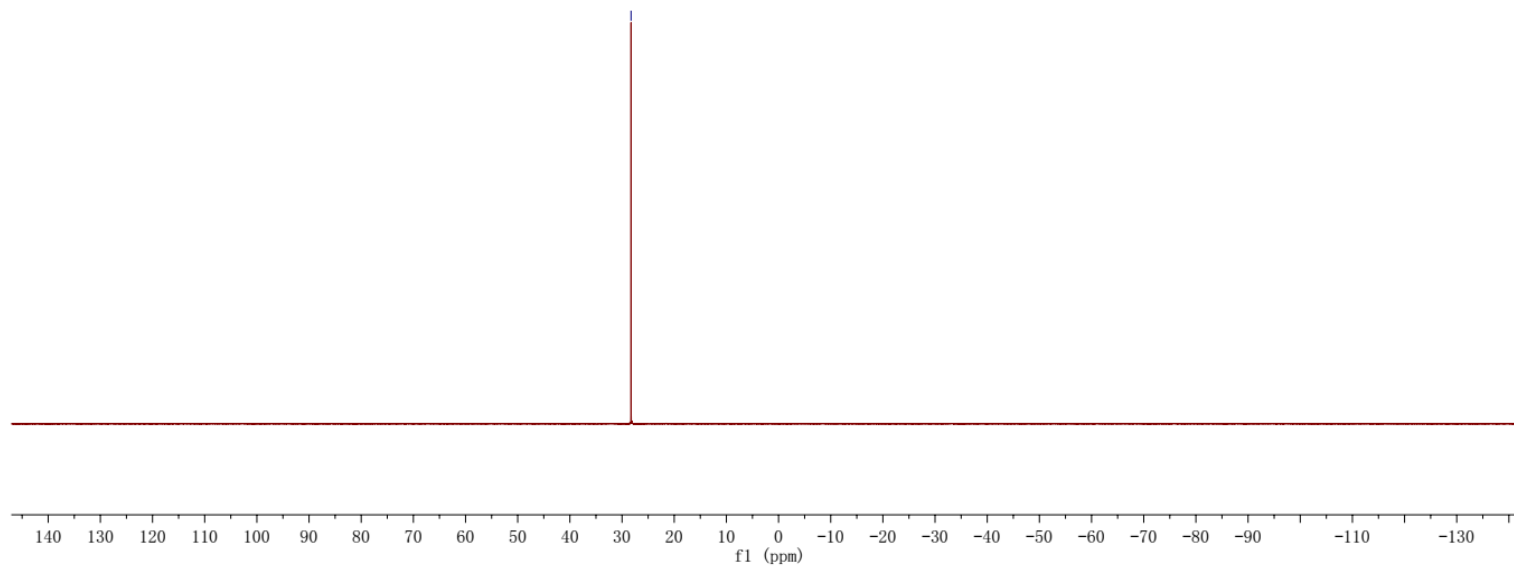

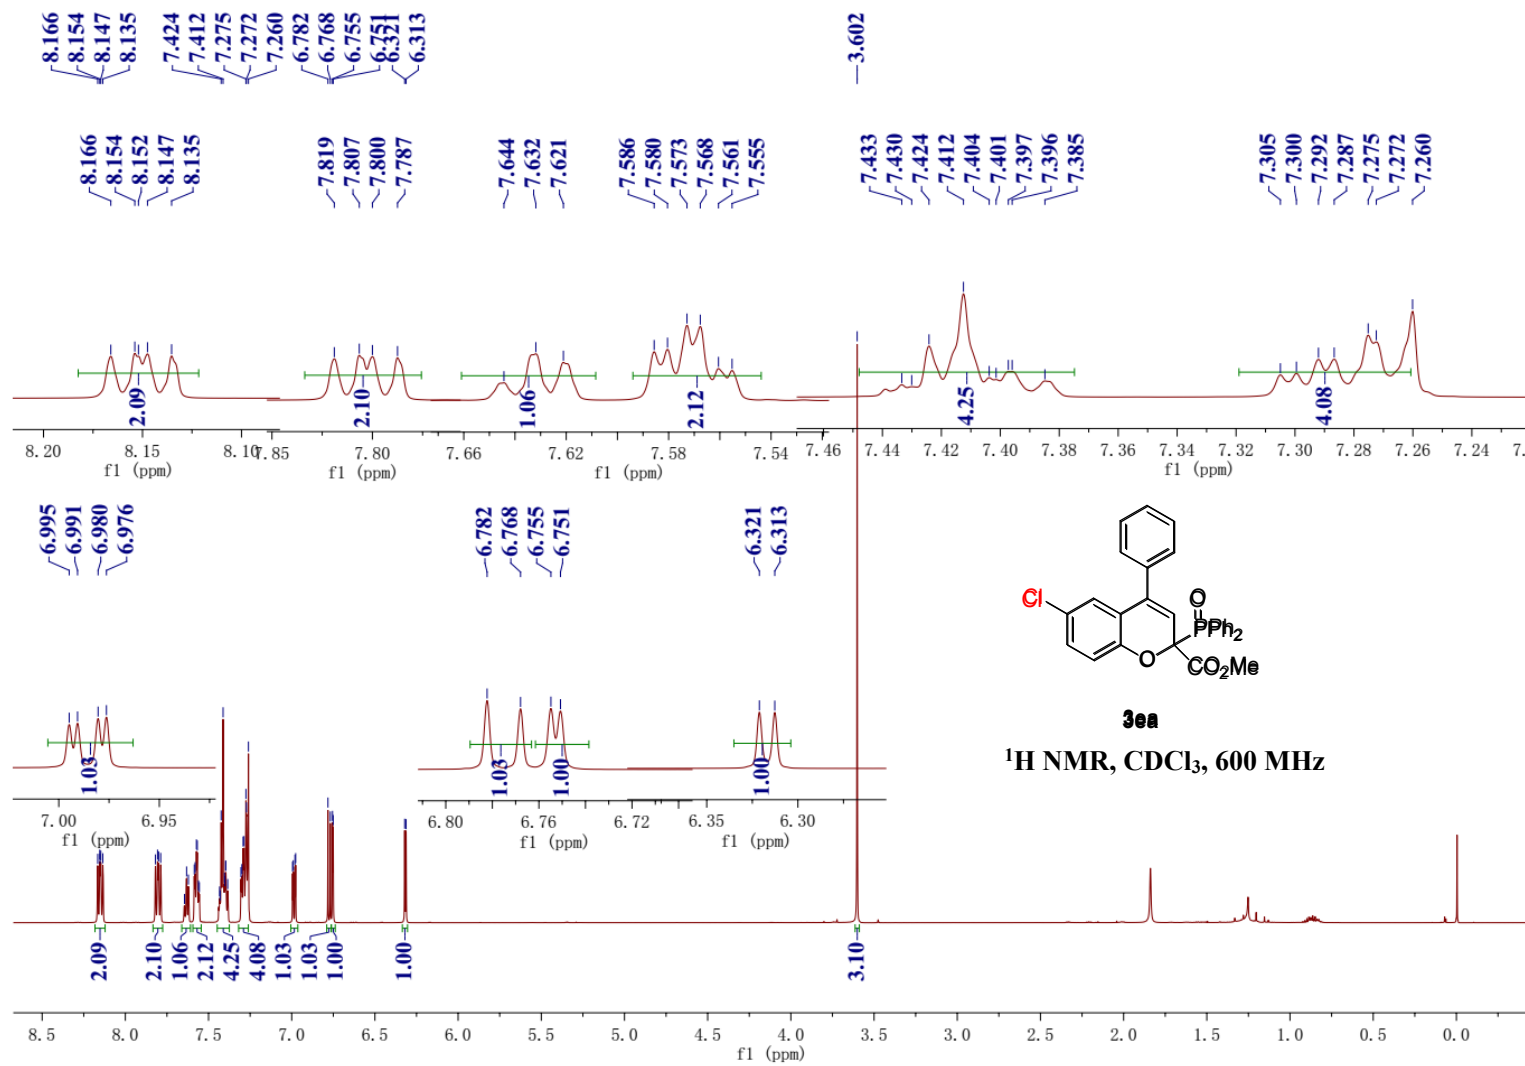

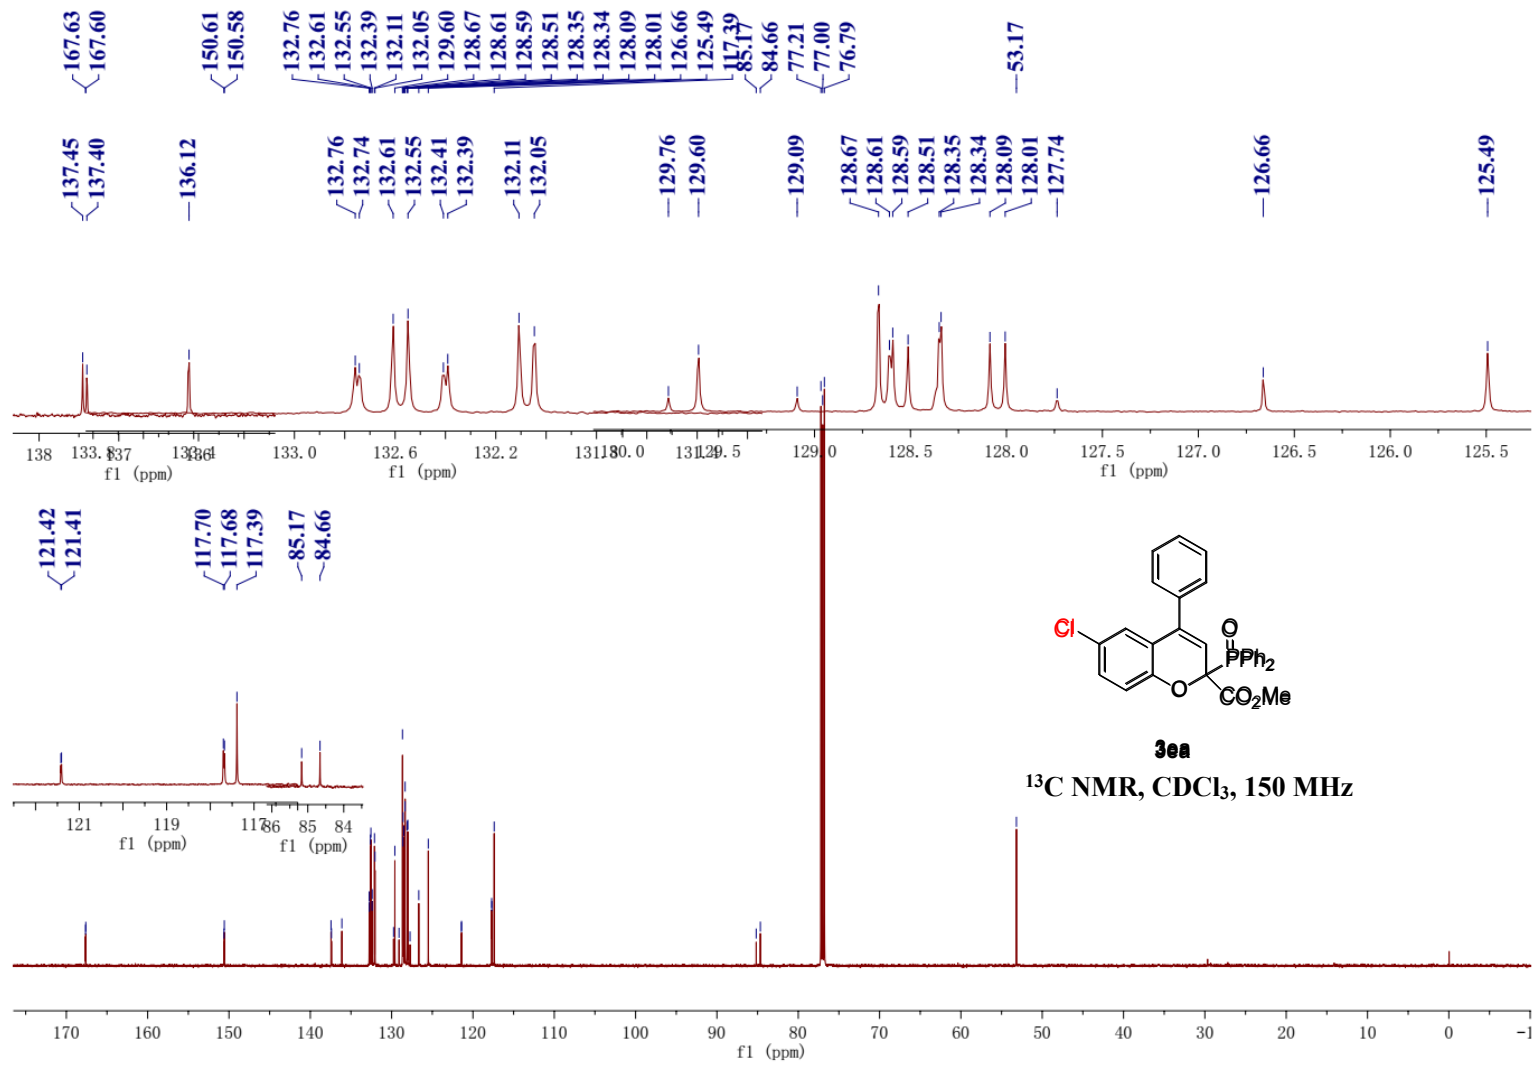

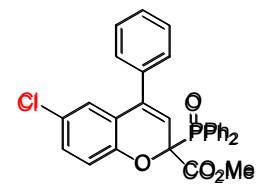

**3aa**

<sup>31</sup>P NMR, CDCl<sub>3</sub>, 243 MHz

-28.34

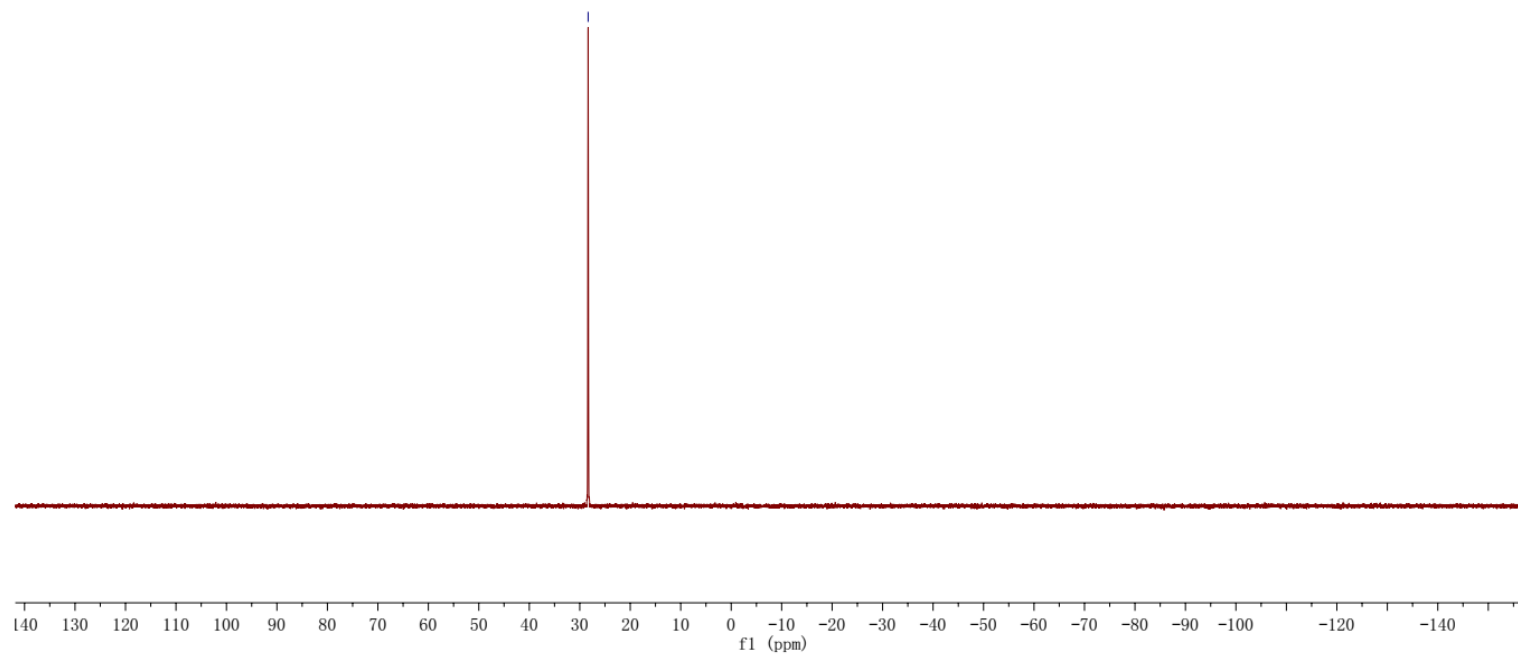

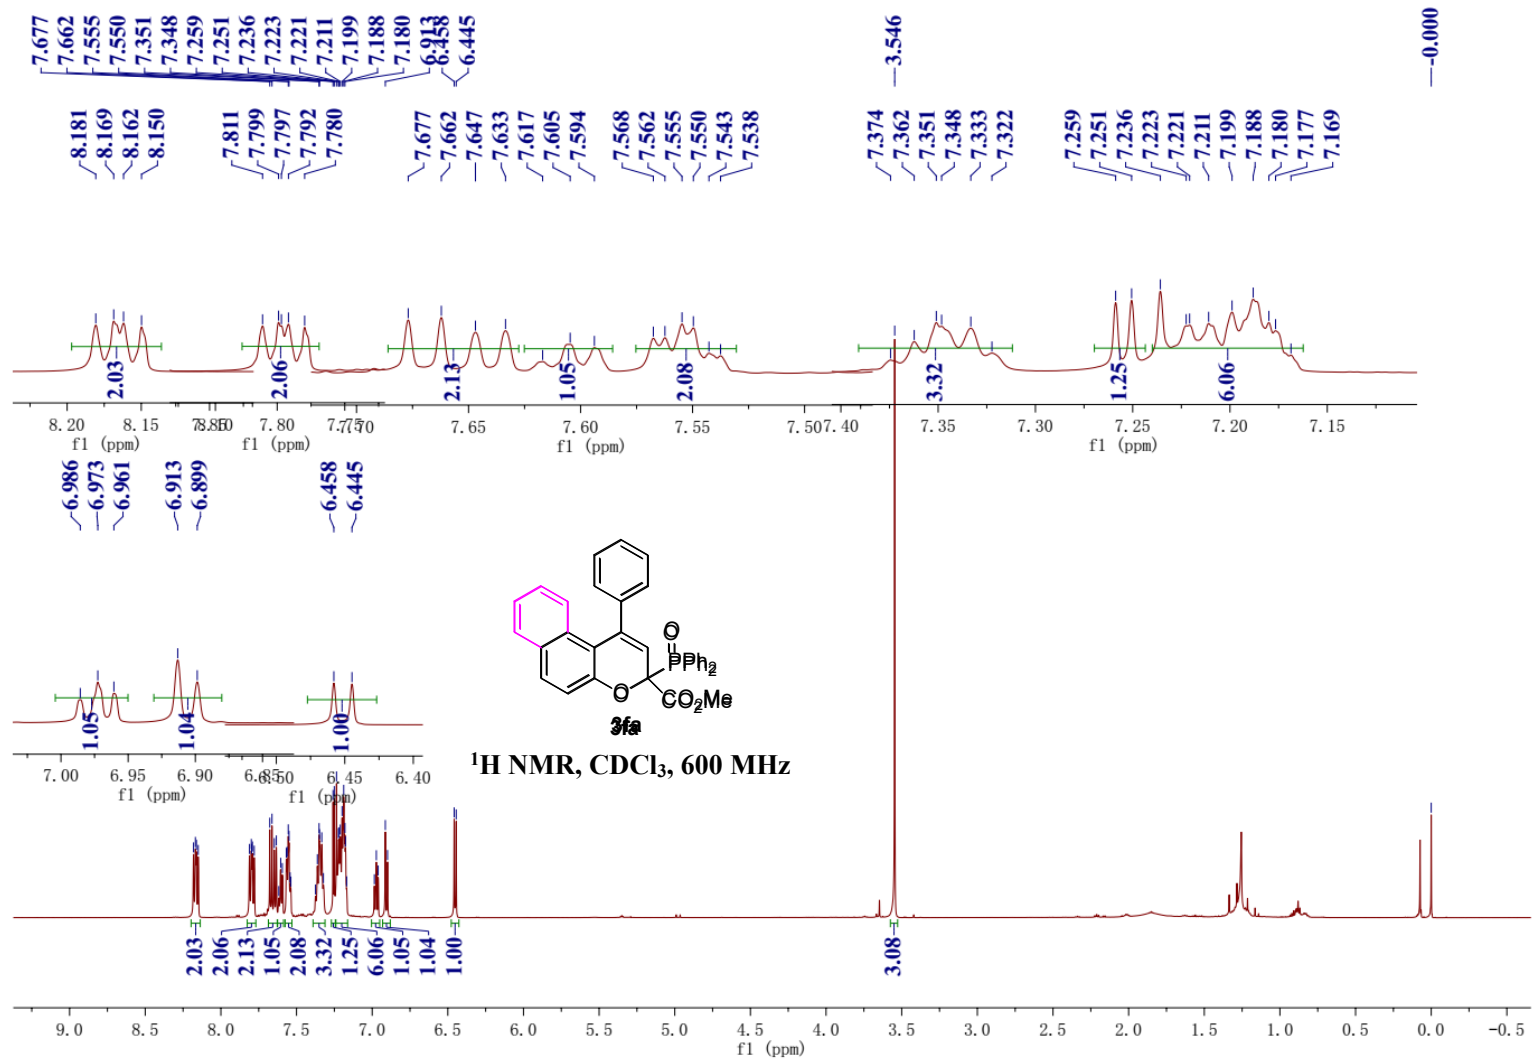

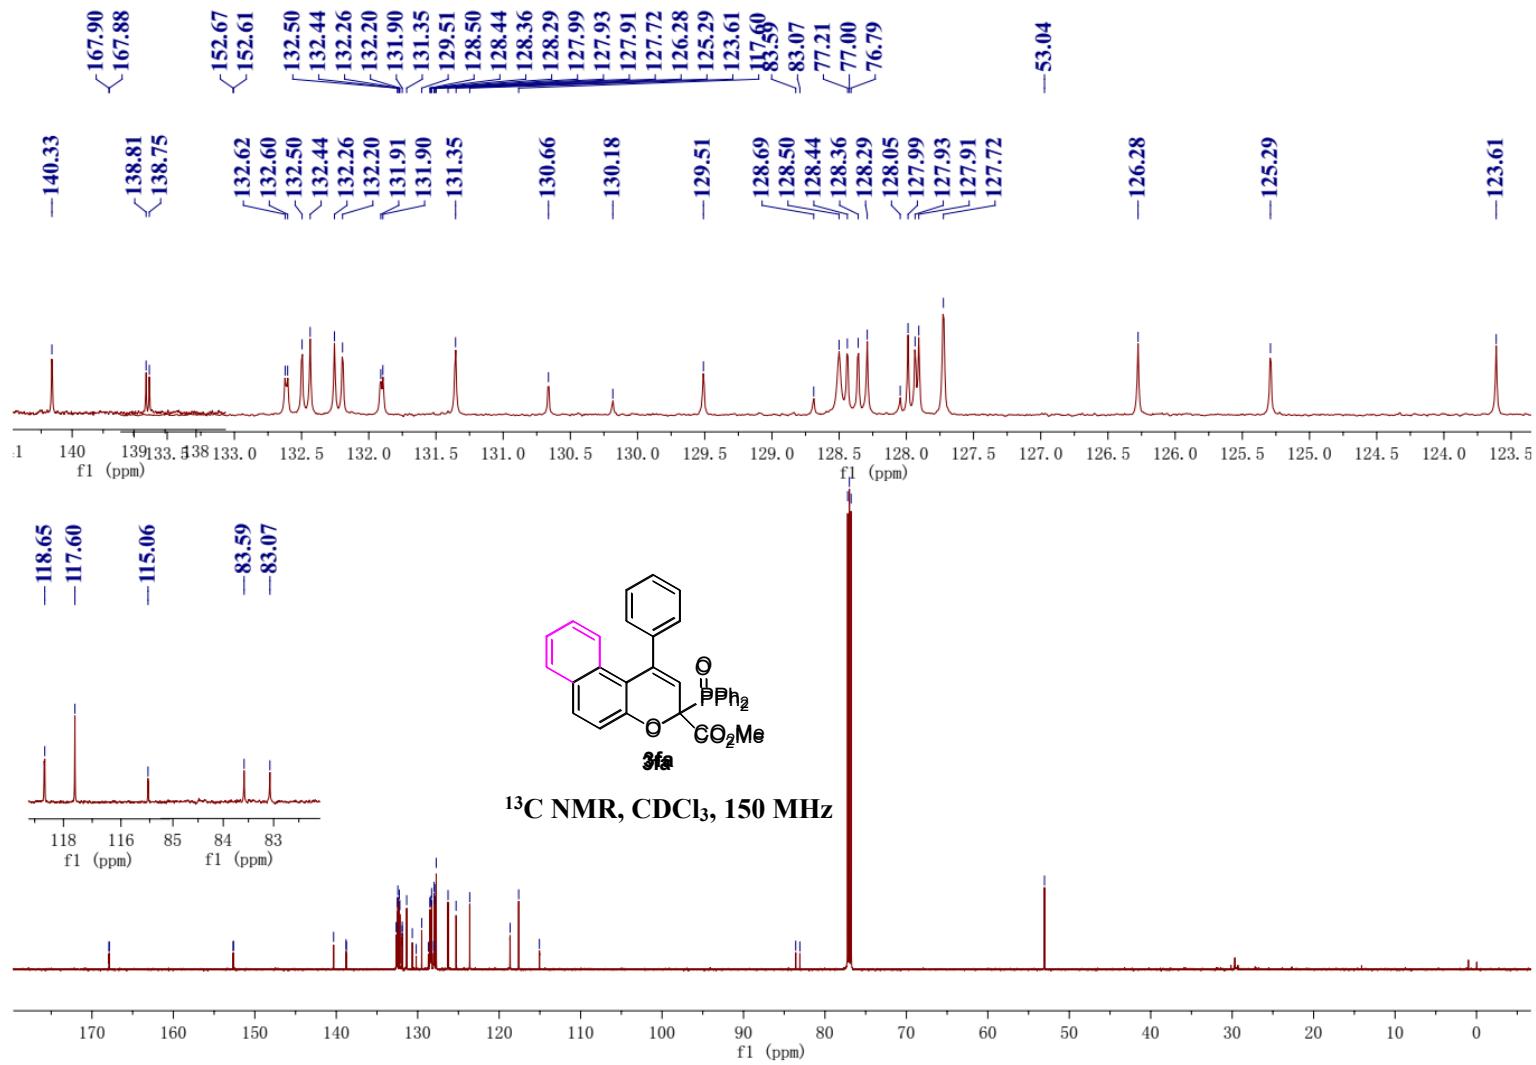

-28.68

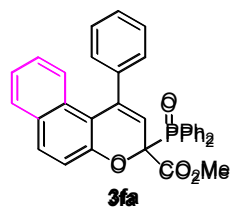

<sup>31</sup>P NMR, CDCl<sub>3</sub>, 243 MHz

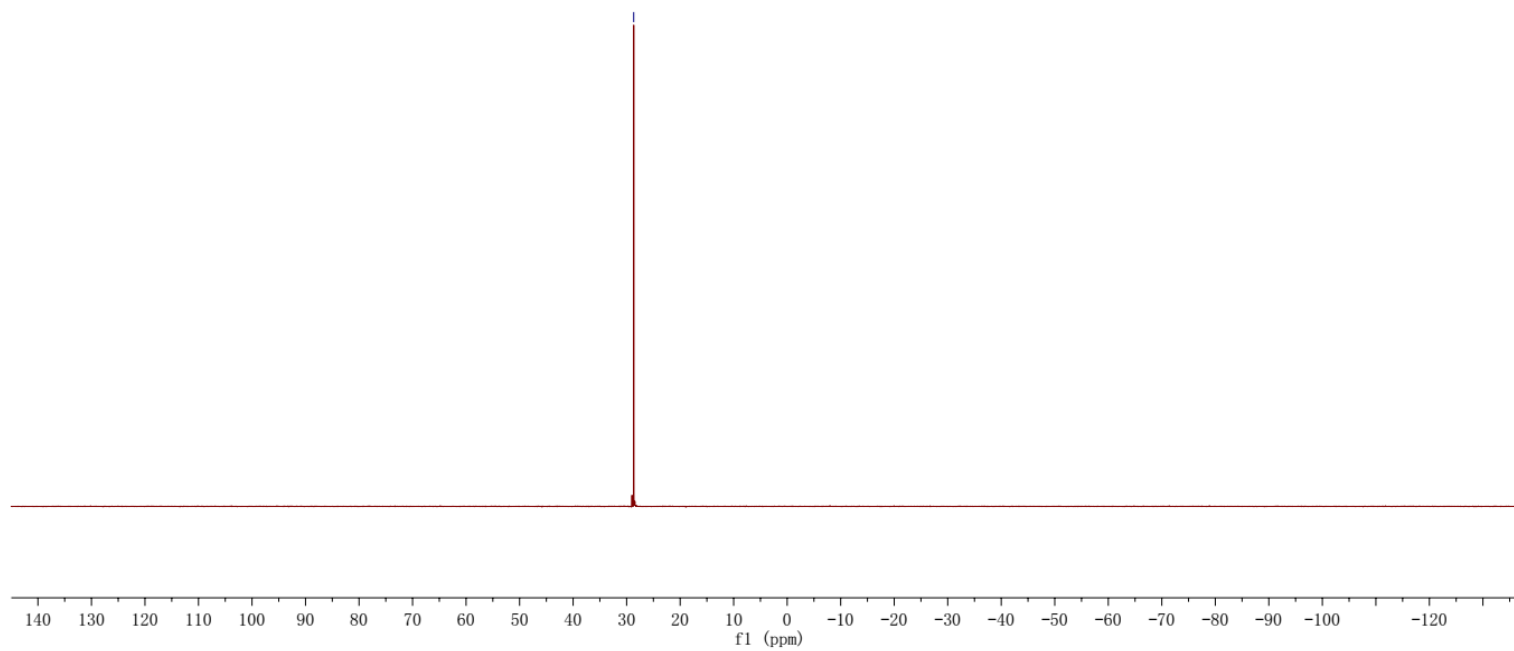



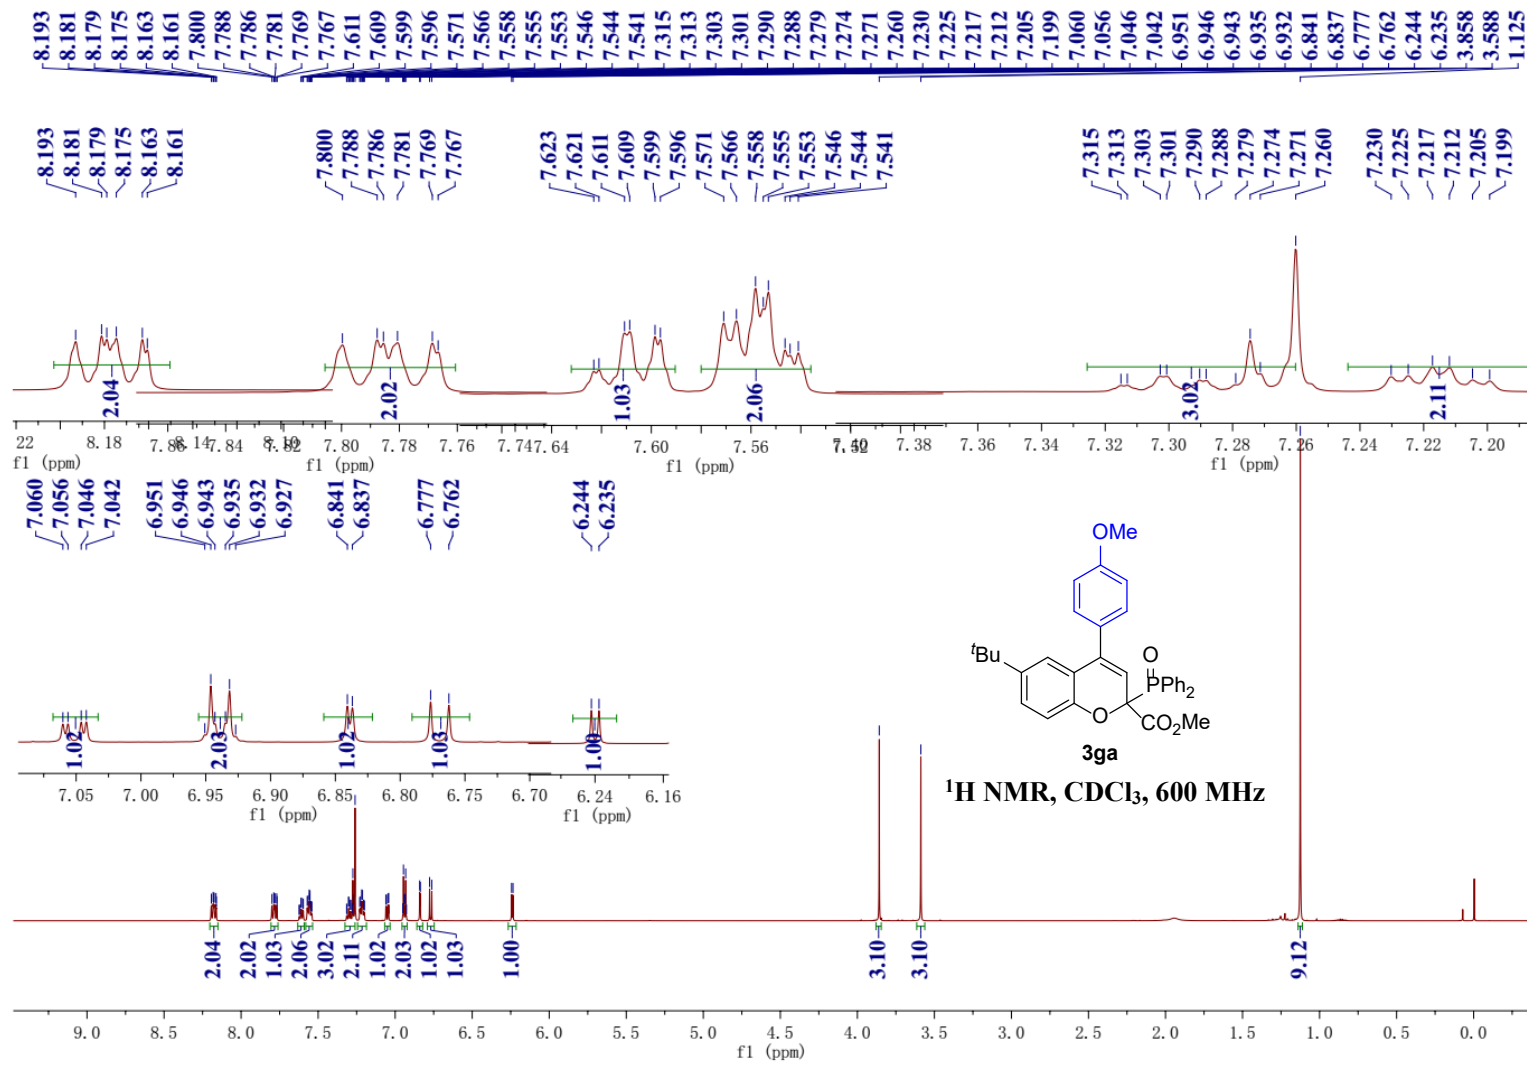

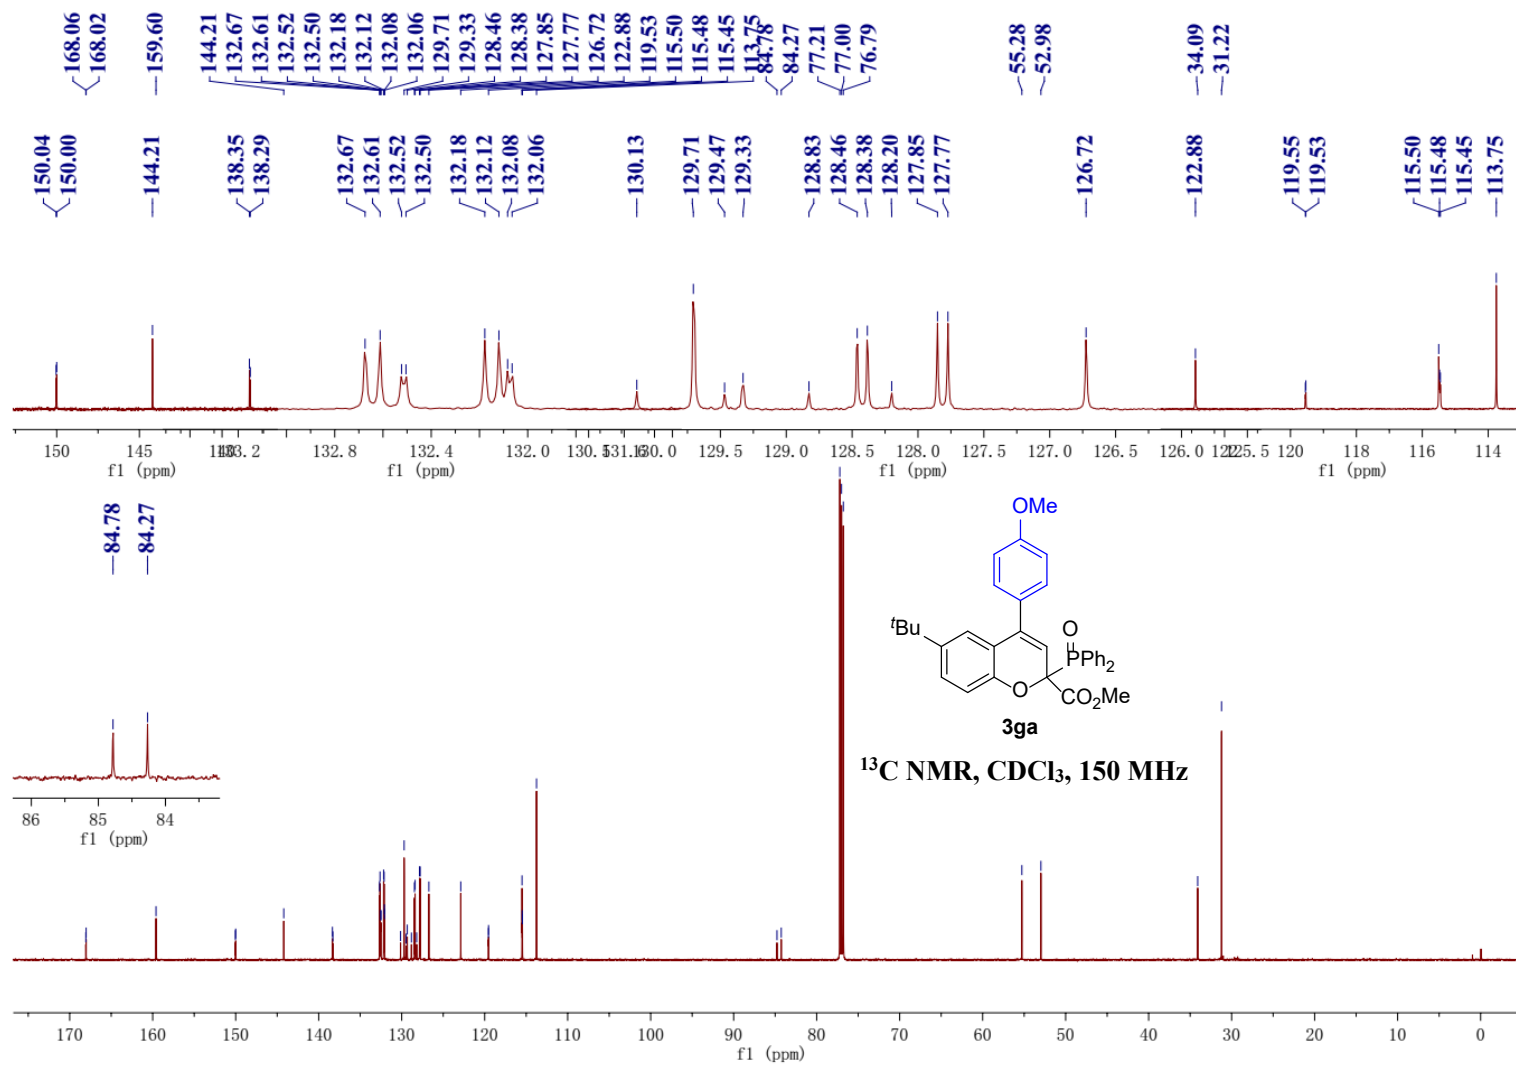

—28.07

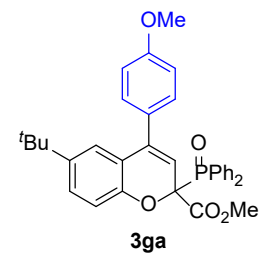

<sup>31</sup>P NMR, CDCl<sub>3</sub>, 243 MHz

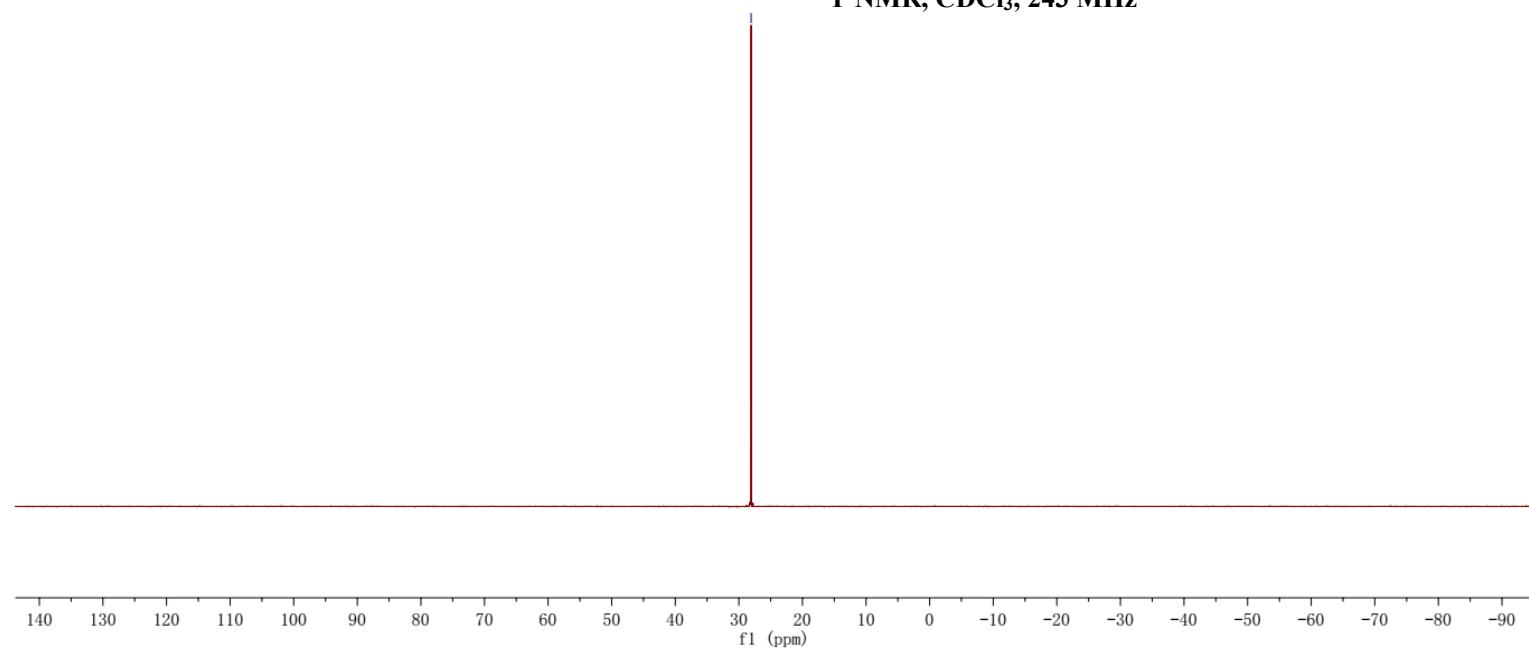

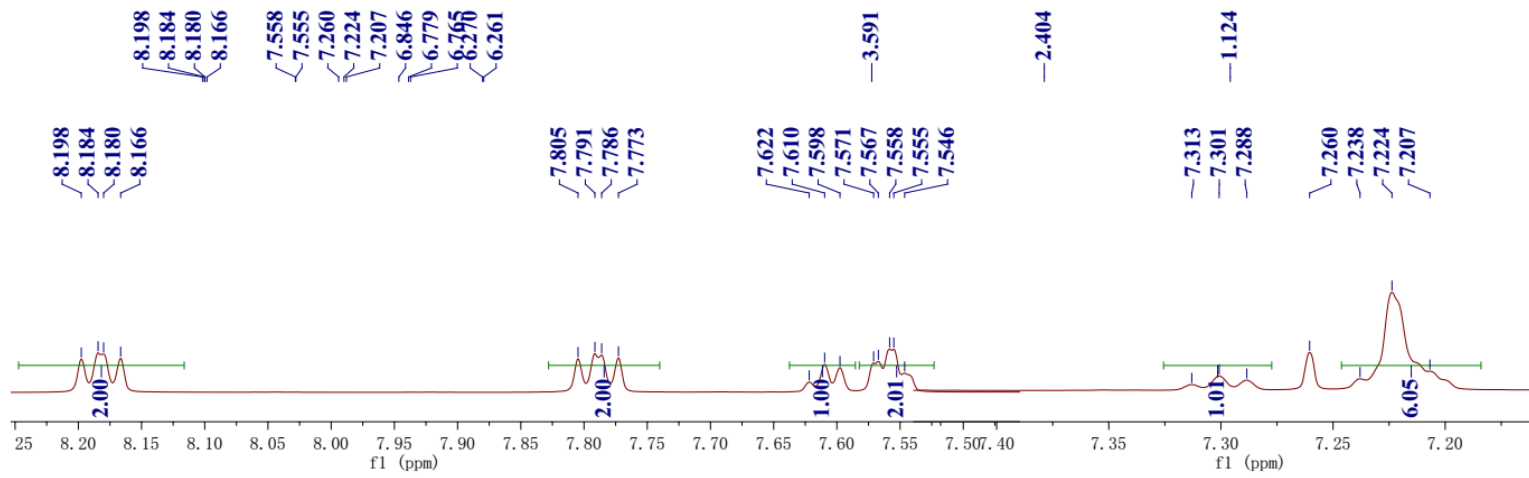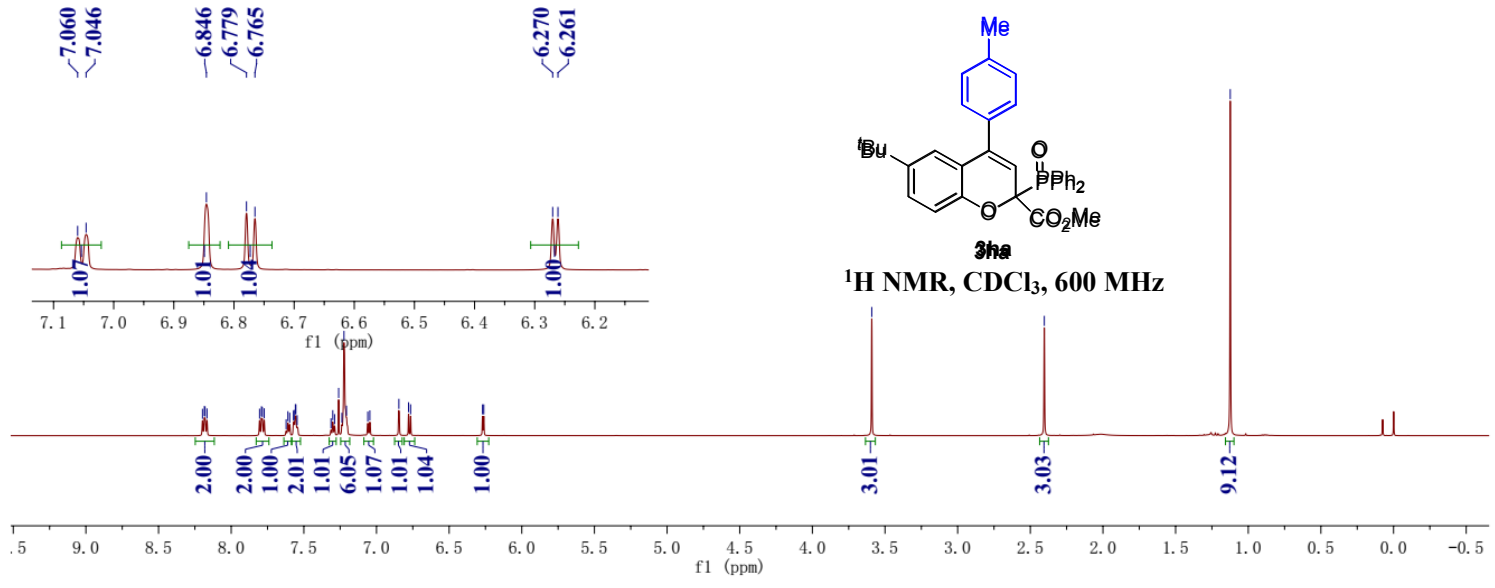

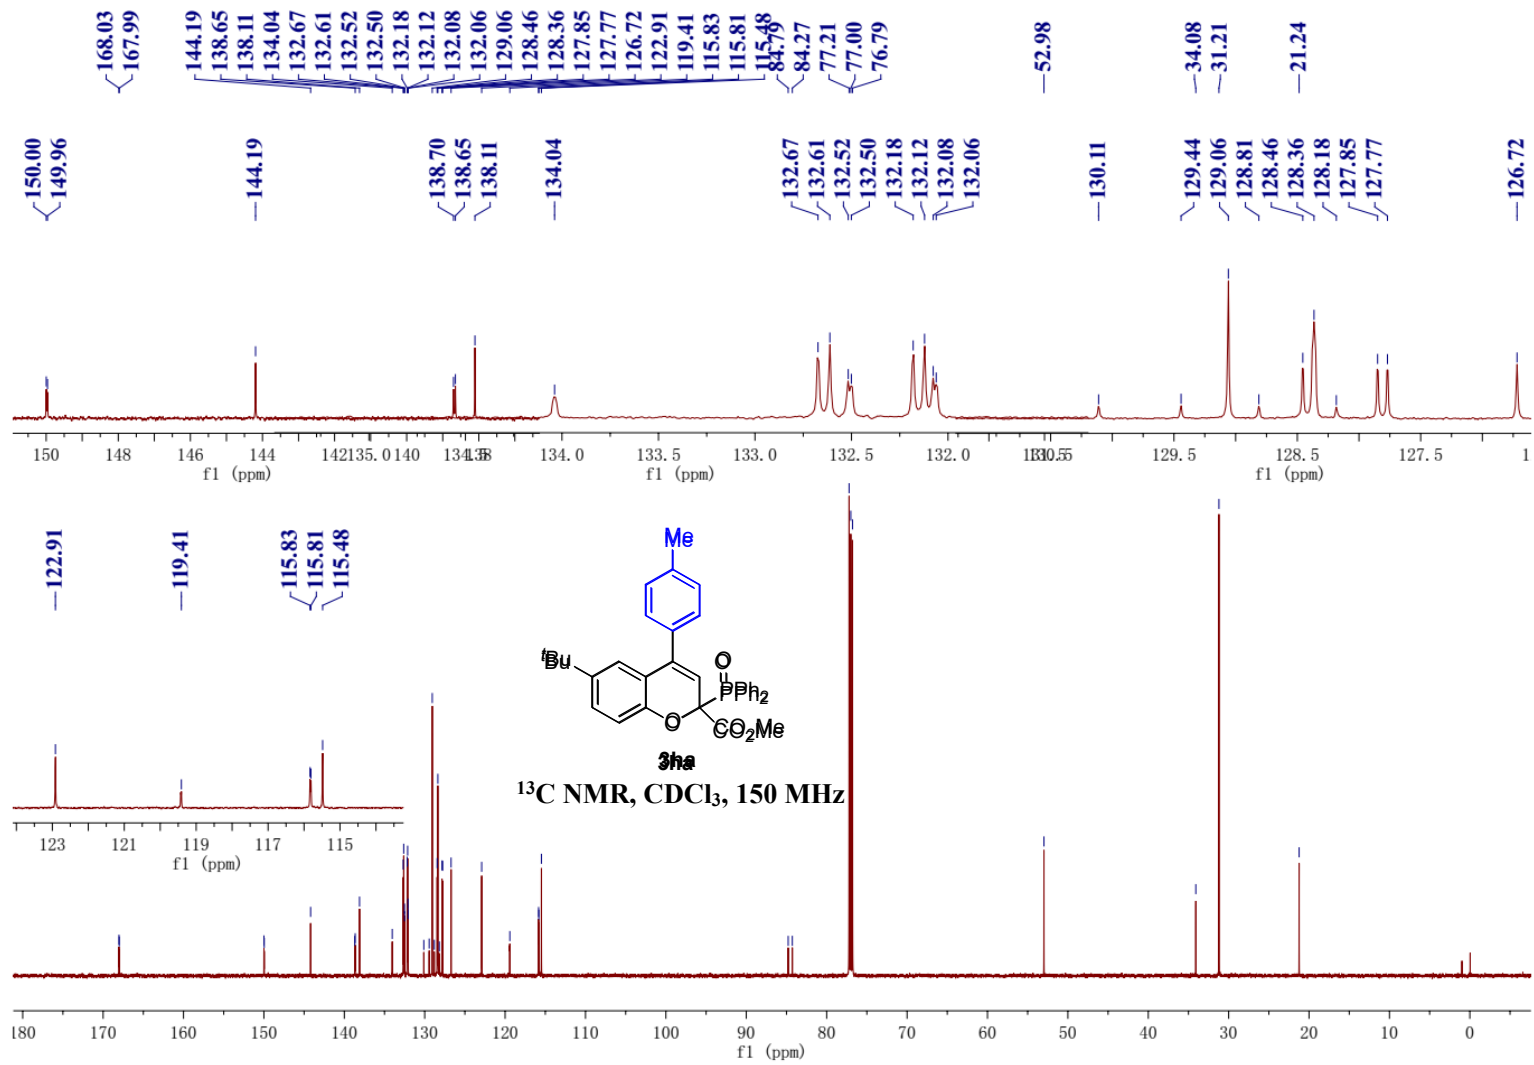

—28.07

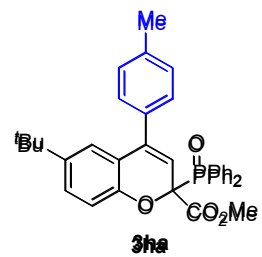

<sup>31</sup>P NMR, CDCl<sub>3</sub>, 243 MHz

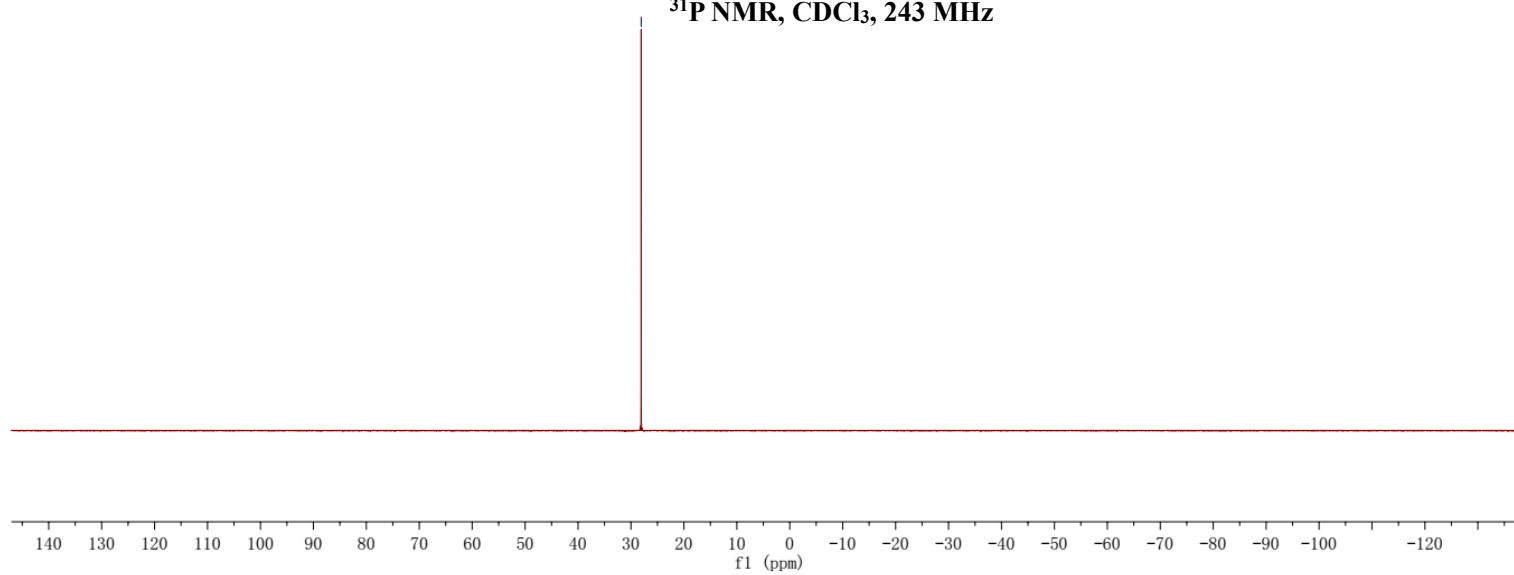

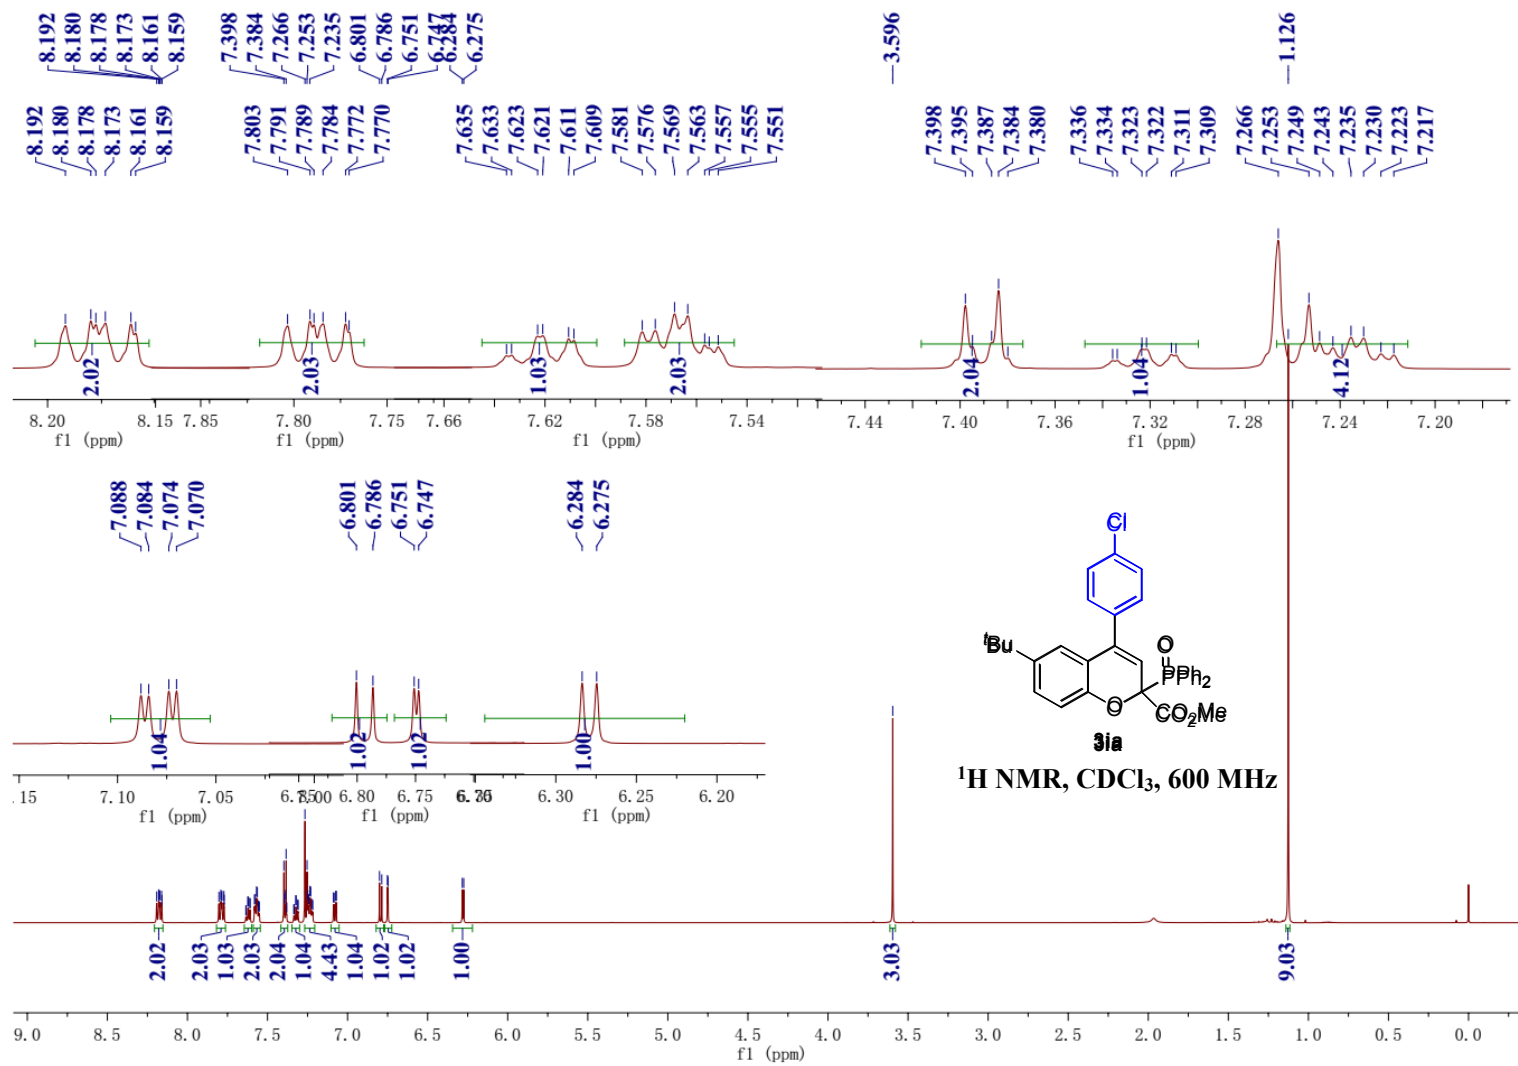

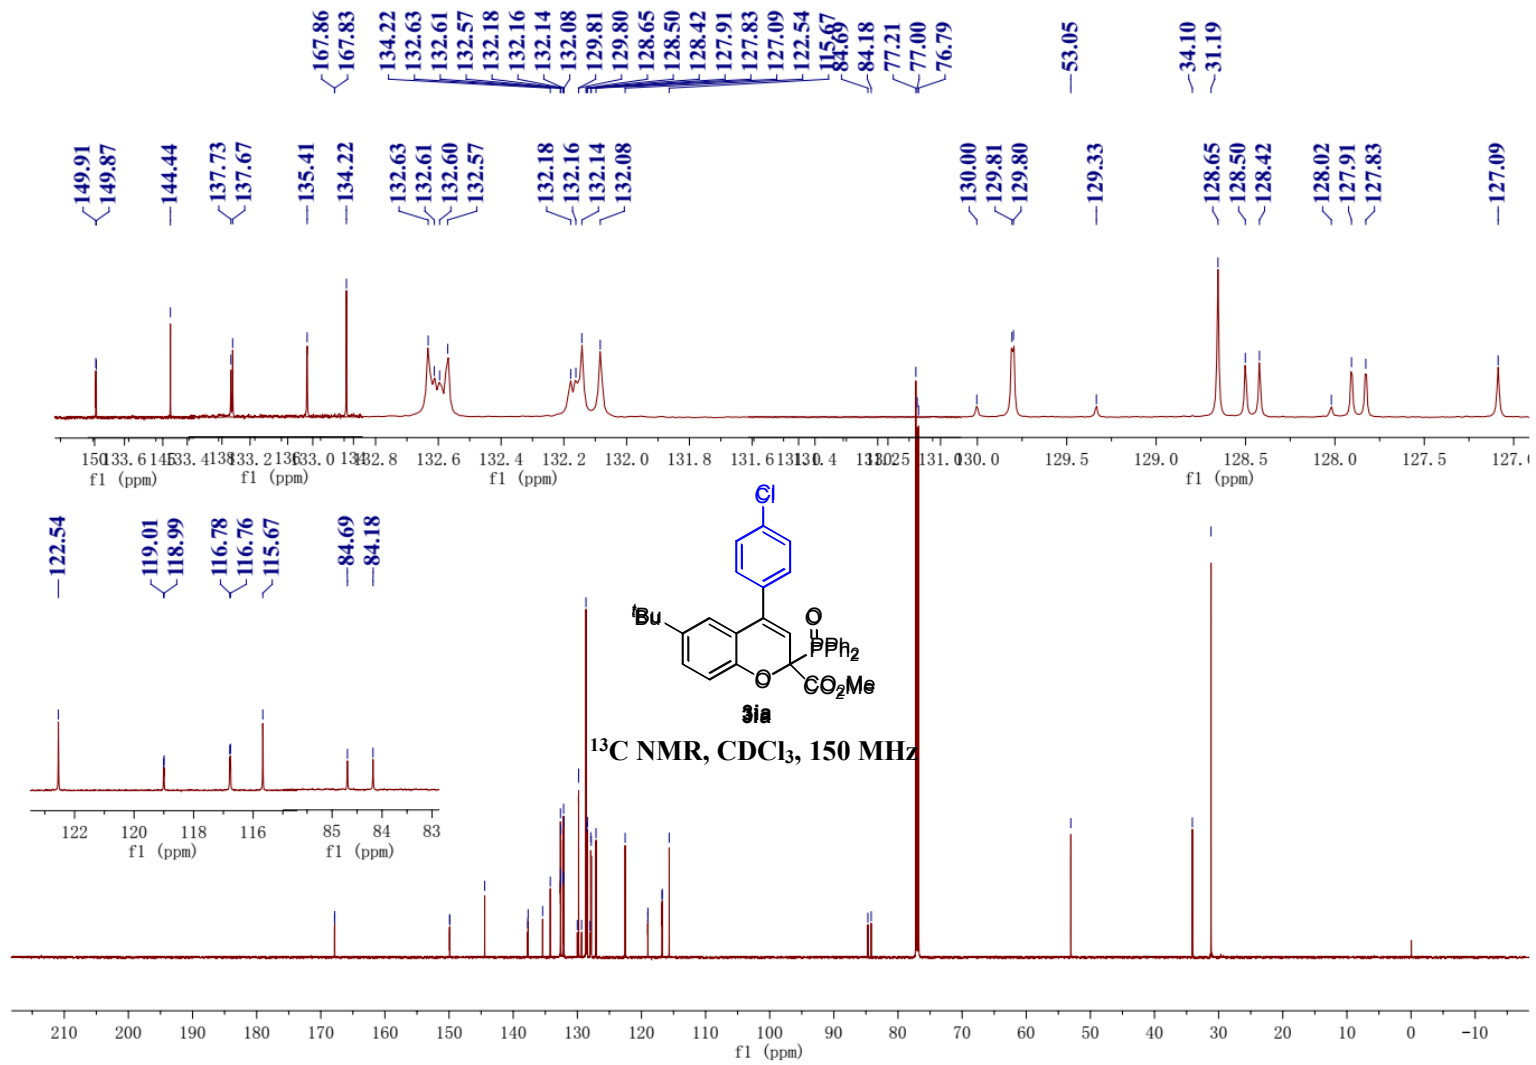



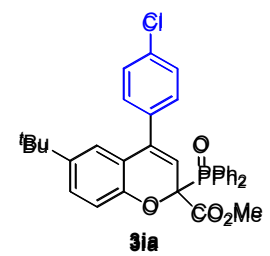

<sup>31</sup>P NMR, CDCl<sub>3</sub>, 243 MHz

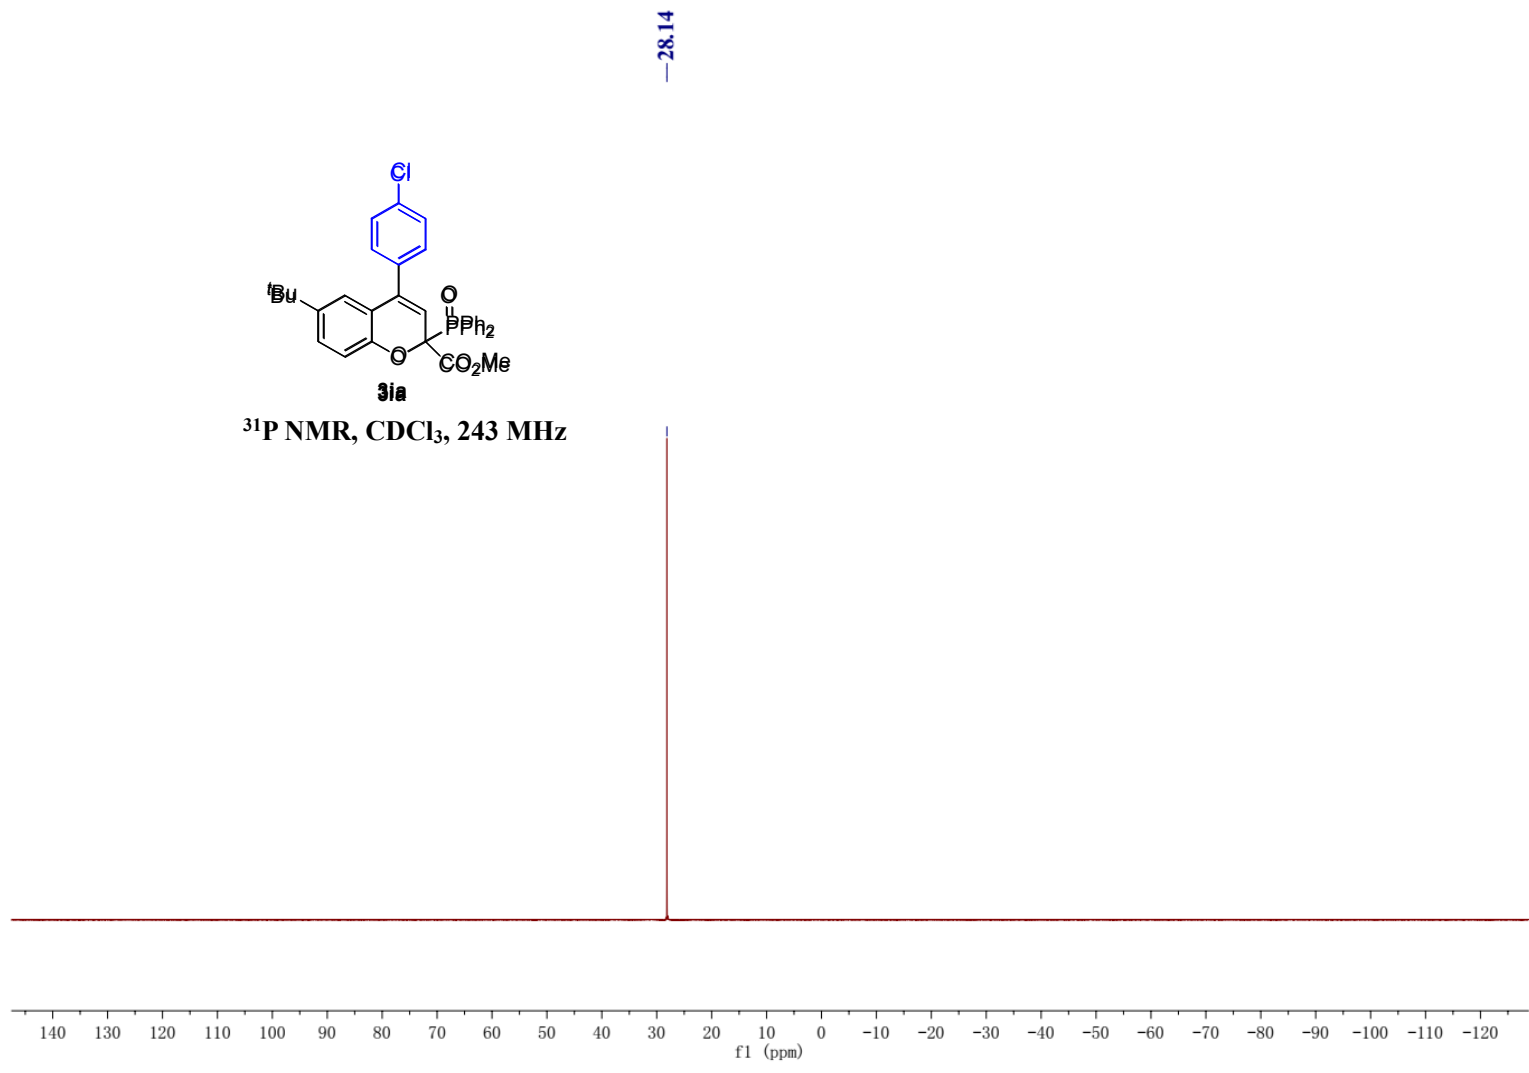

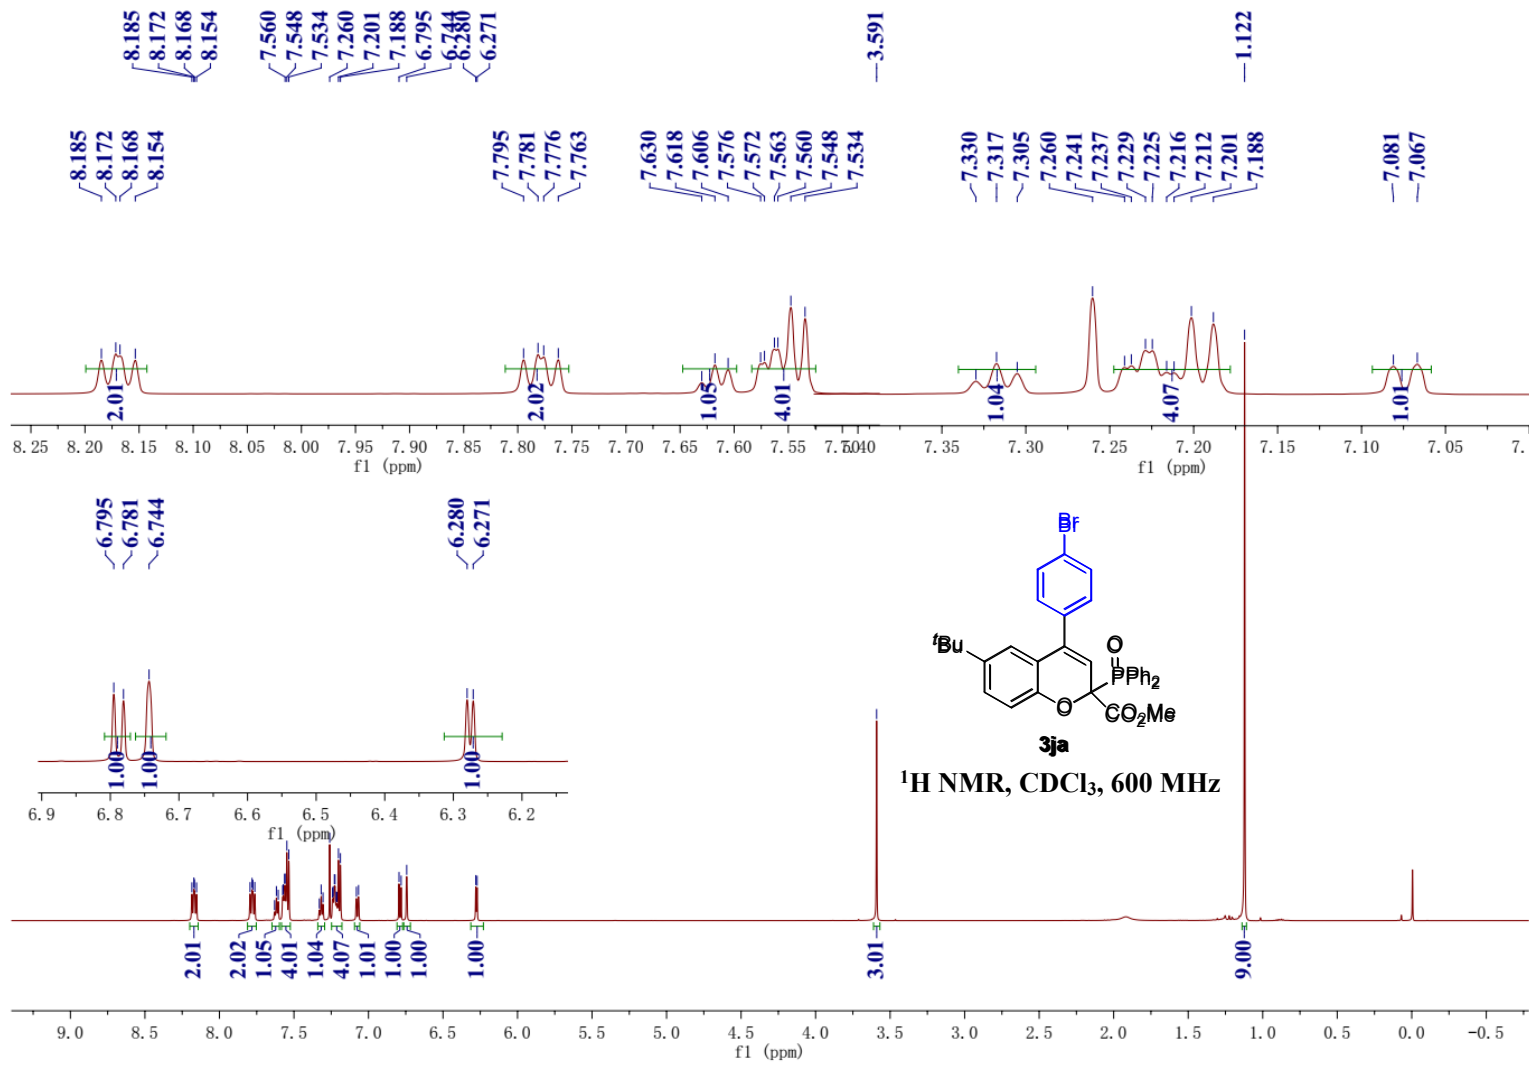

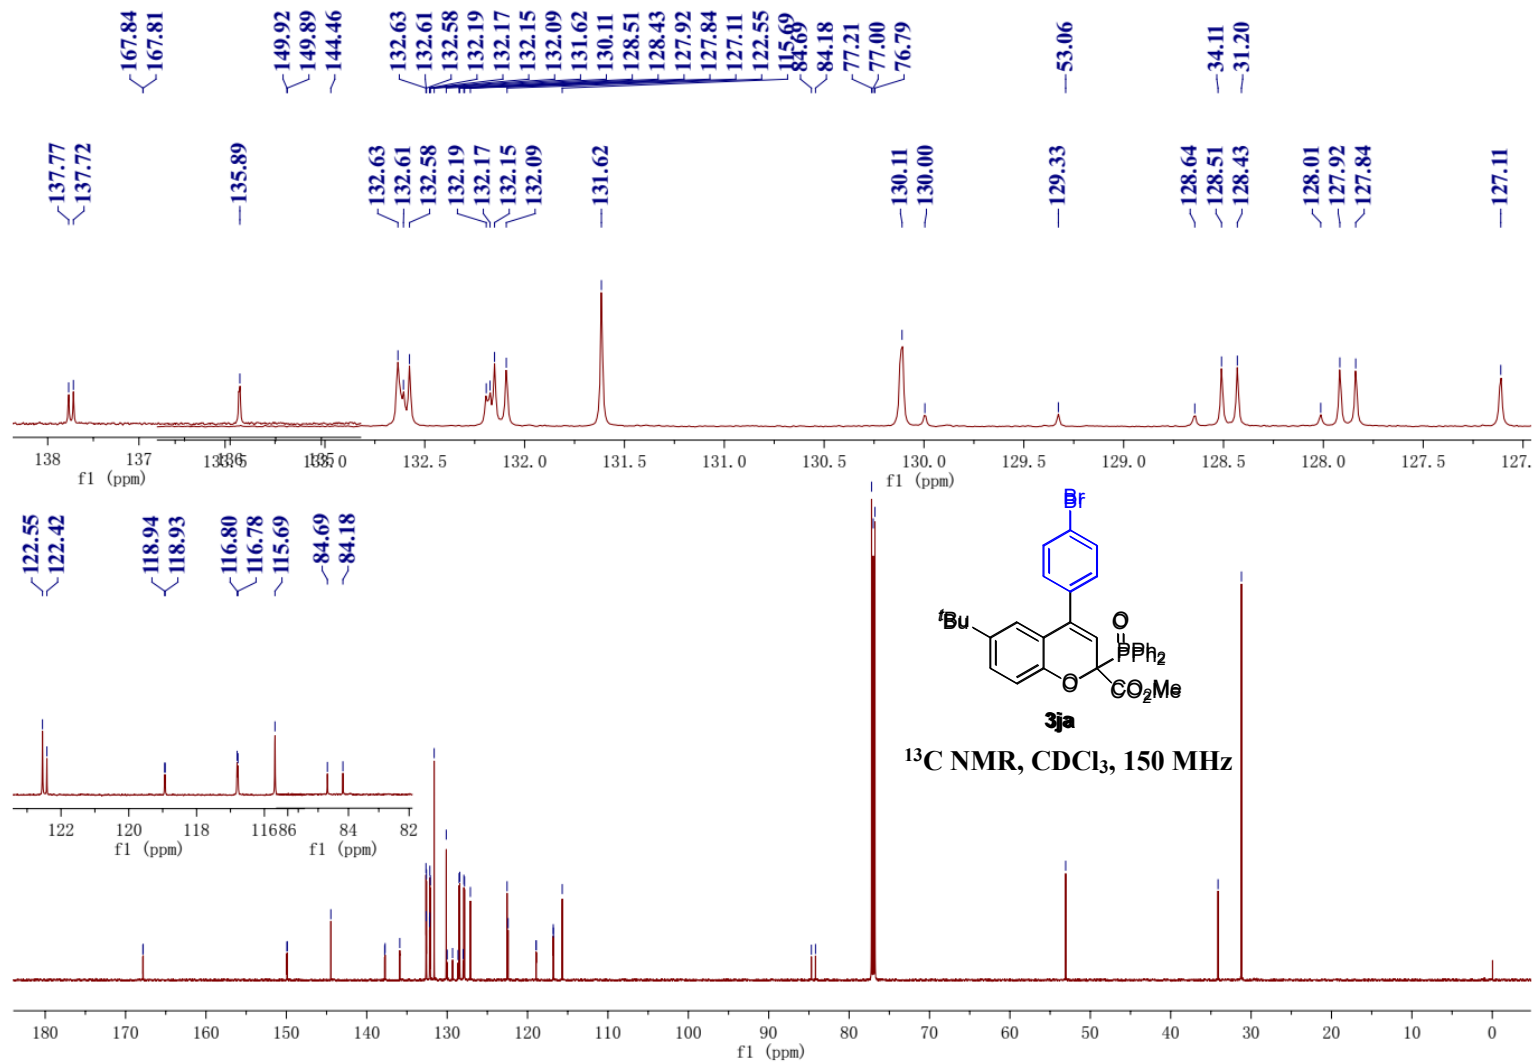

— 28.14

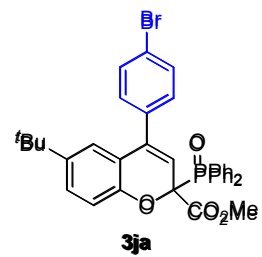

<sup>31</sup>P NMR, CDCl<sub>3</sub>, 243 MHz

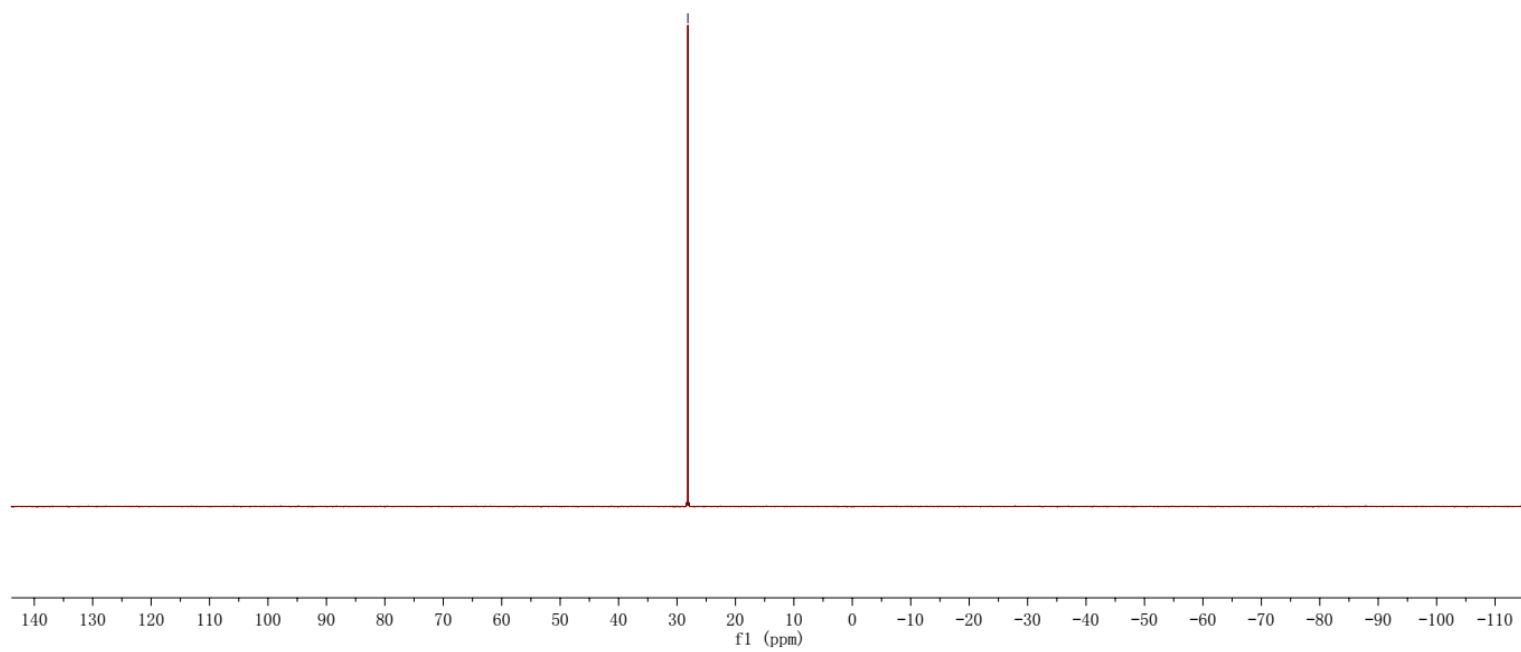

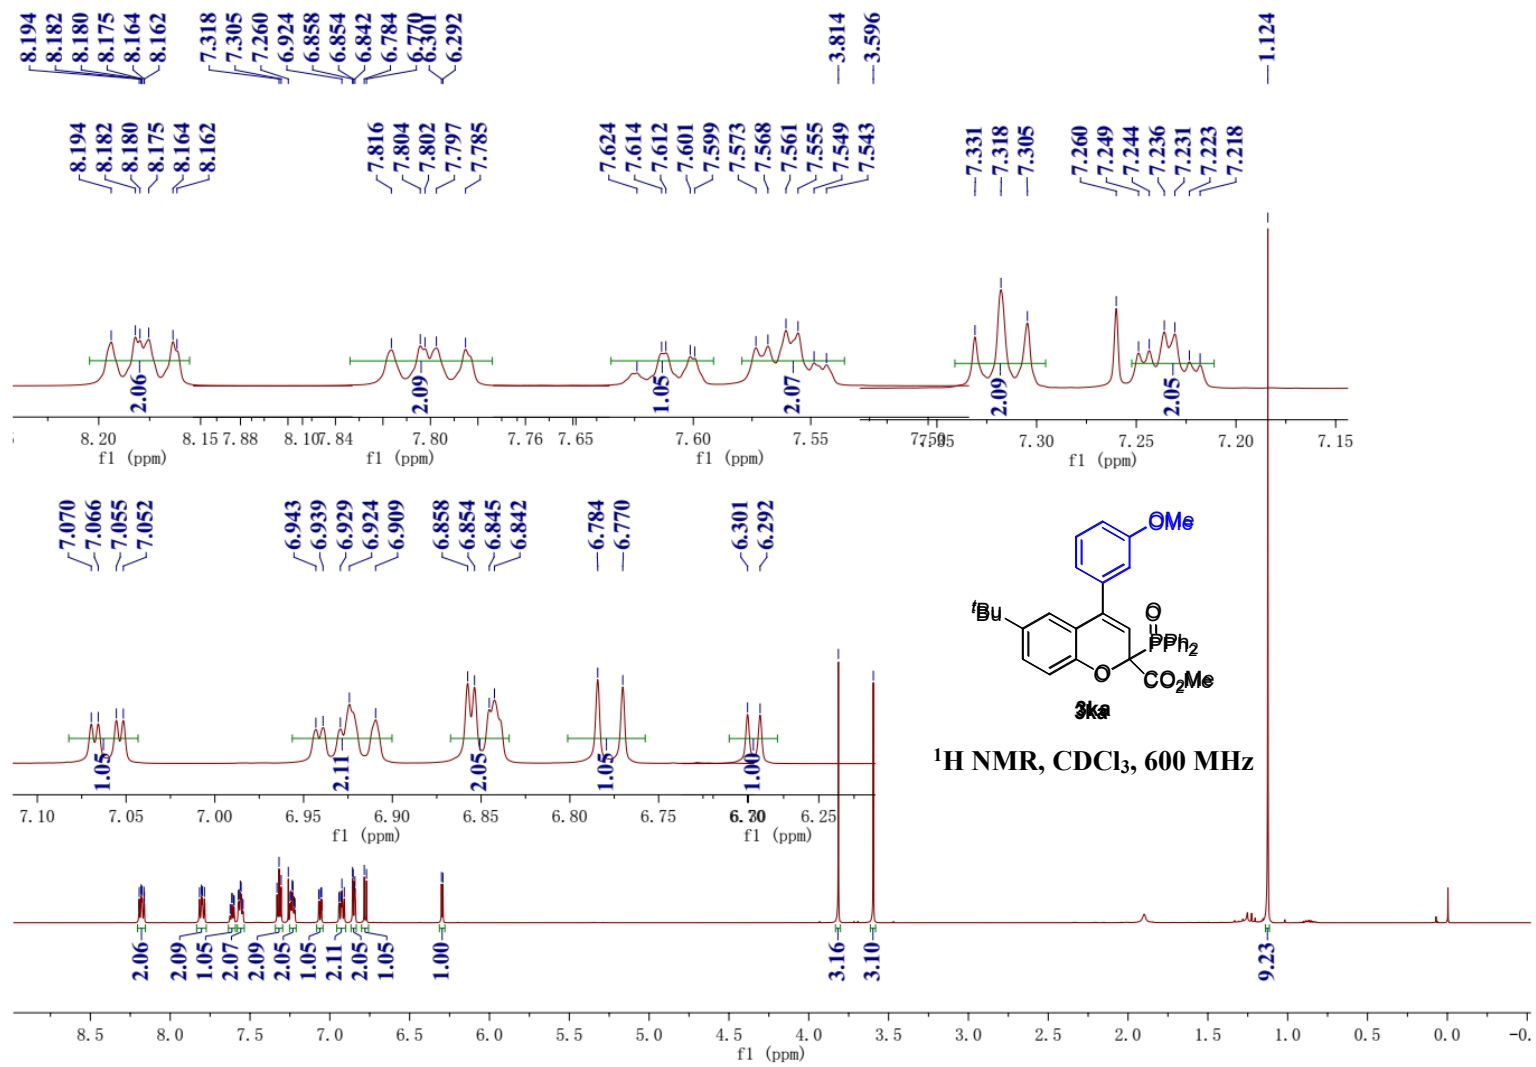

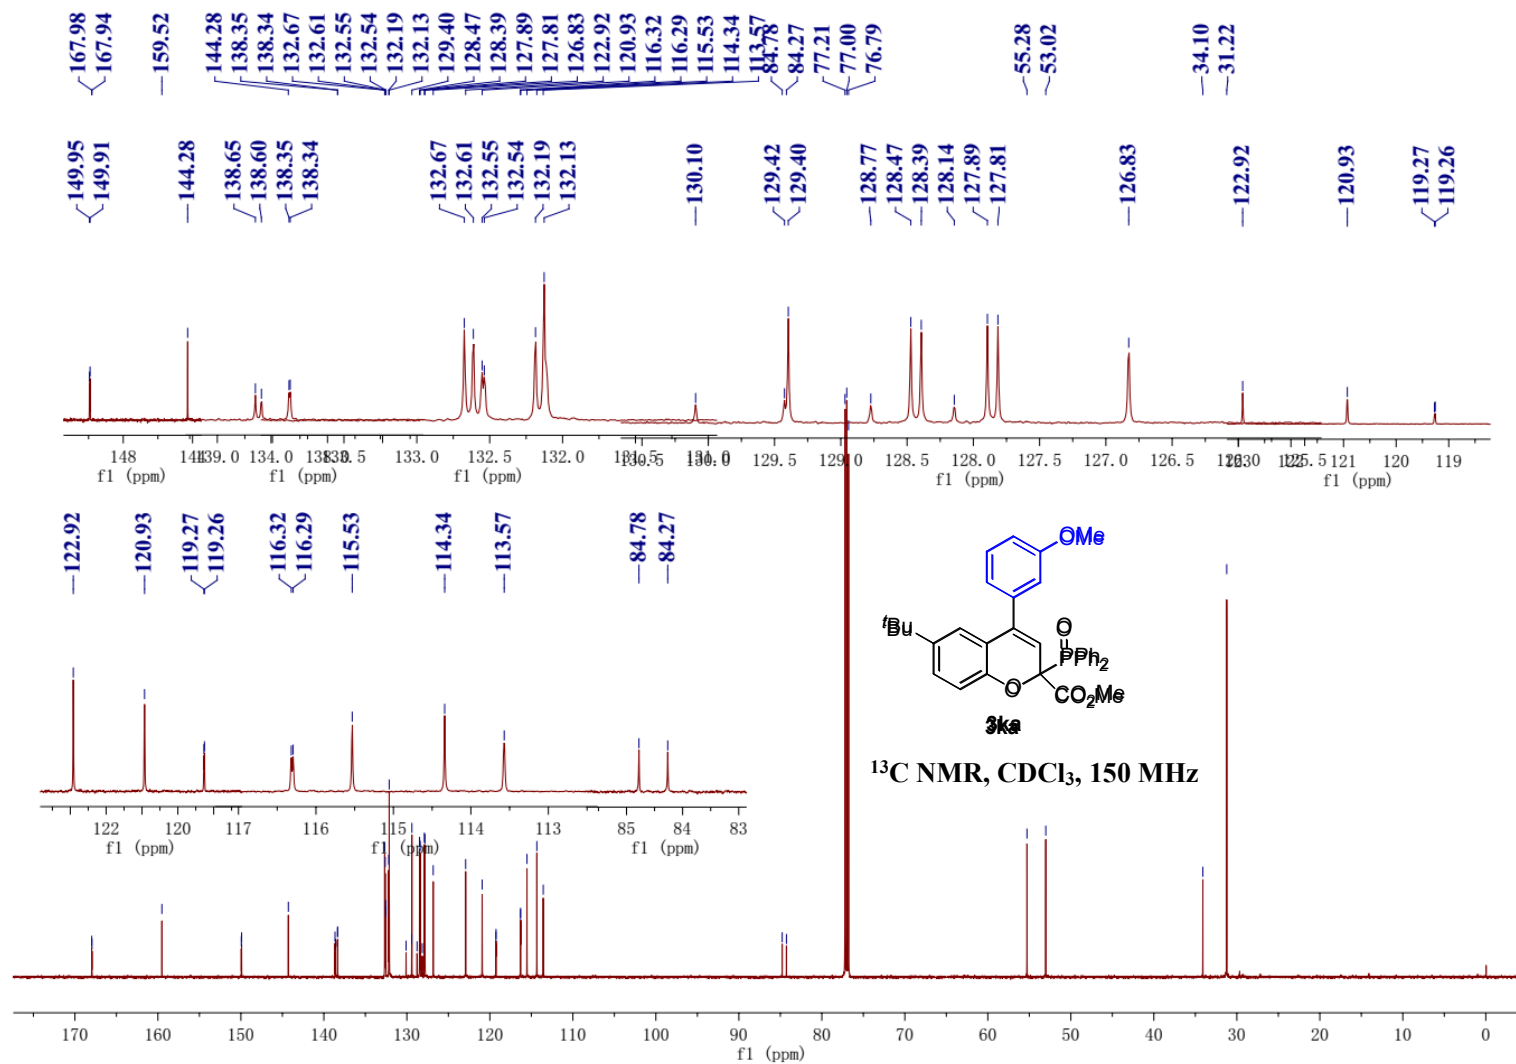

—28.13

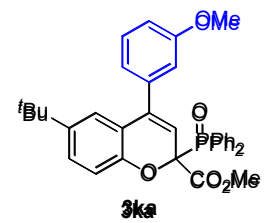

$^{31}\text{P}$  NMR,  $\text{CDCl}_3$ , 243 MHz

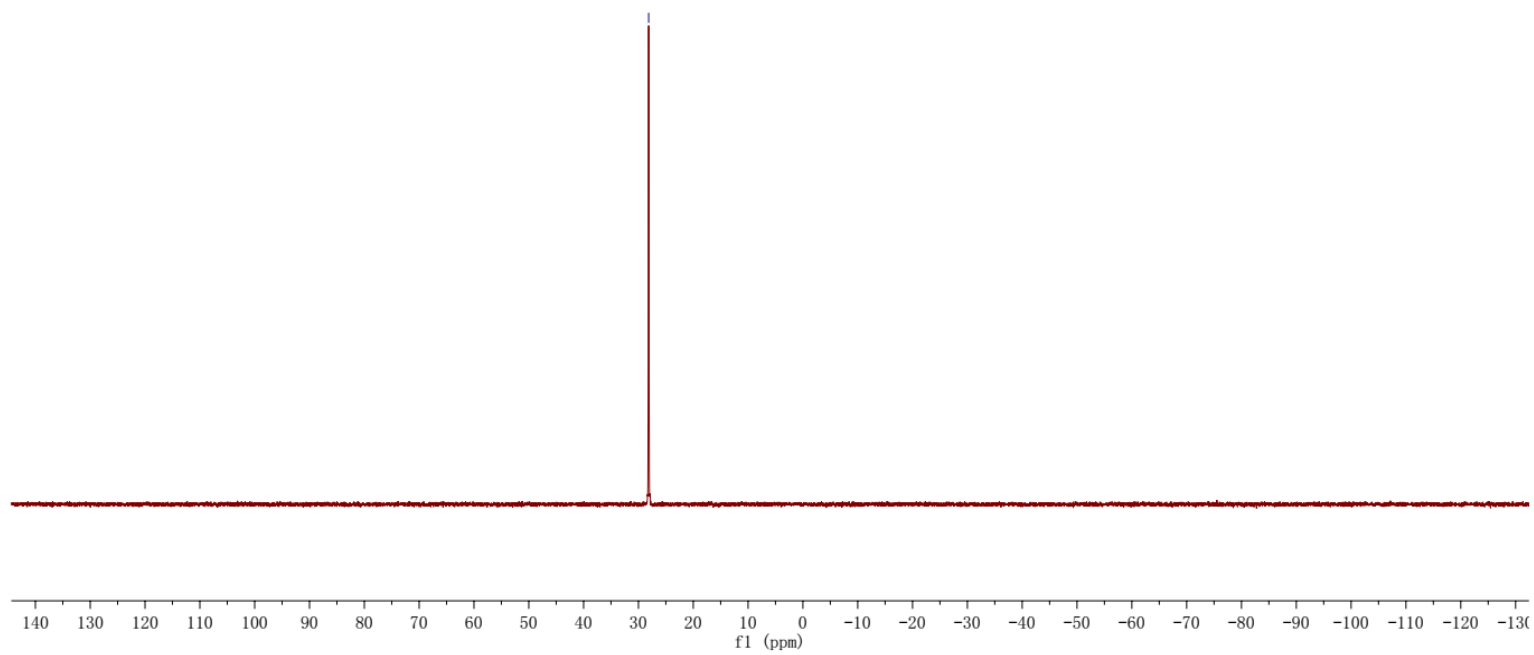

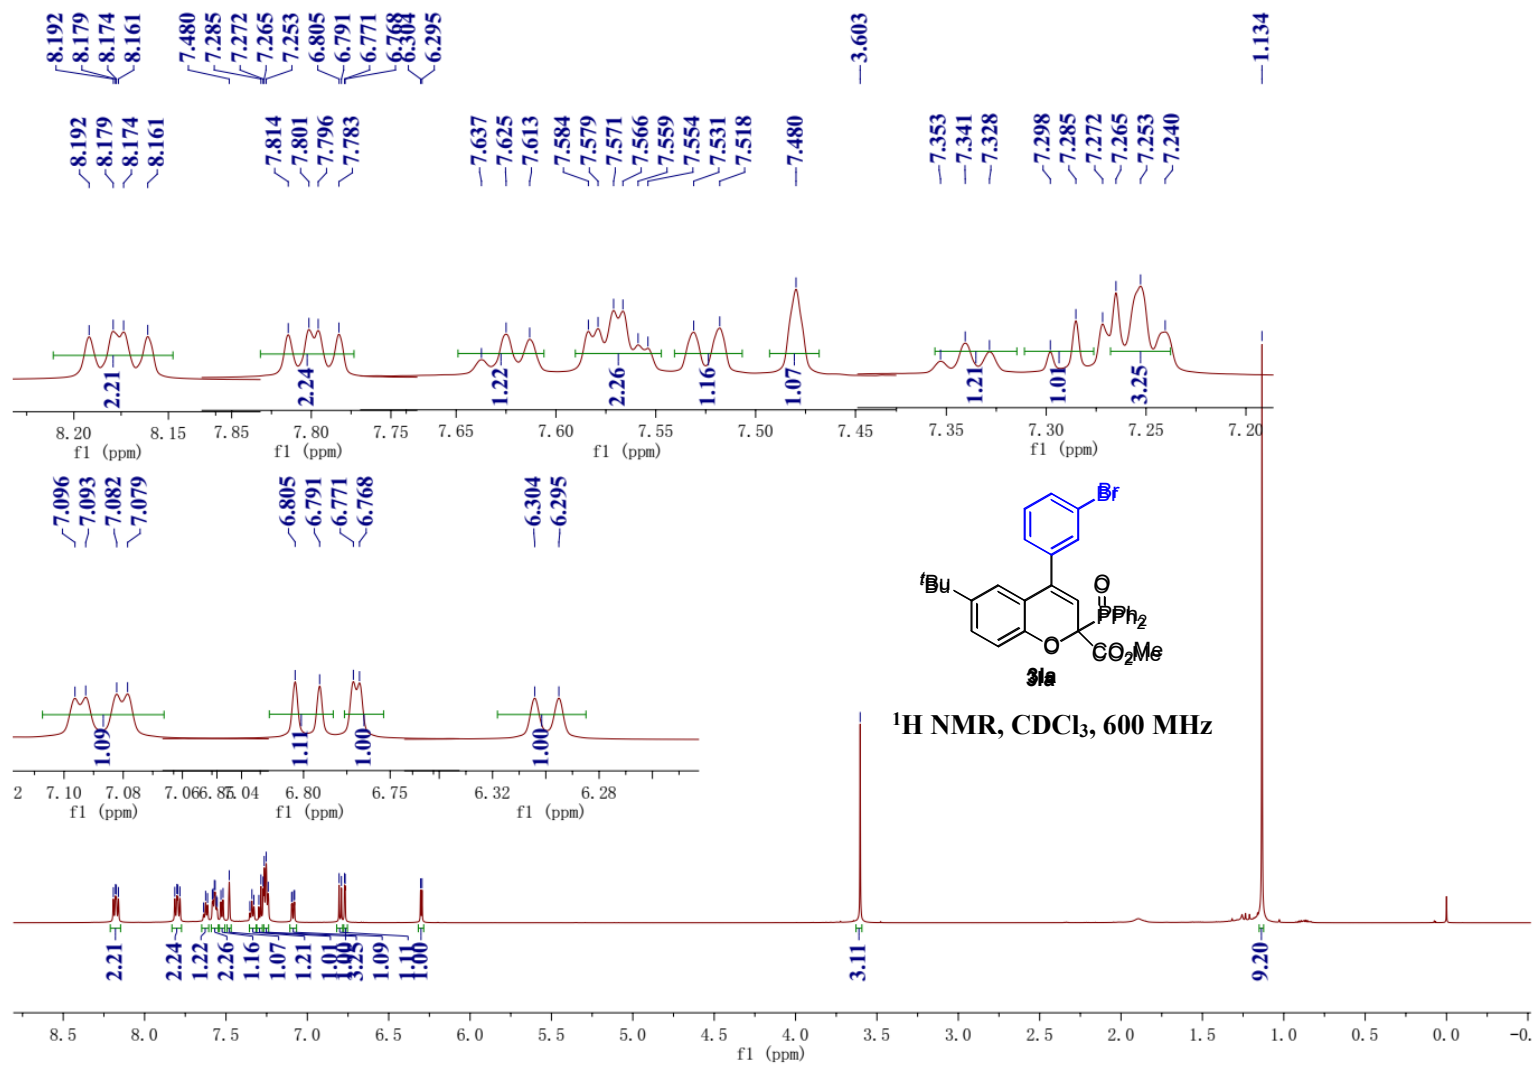



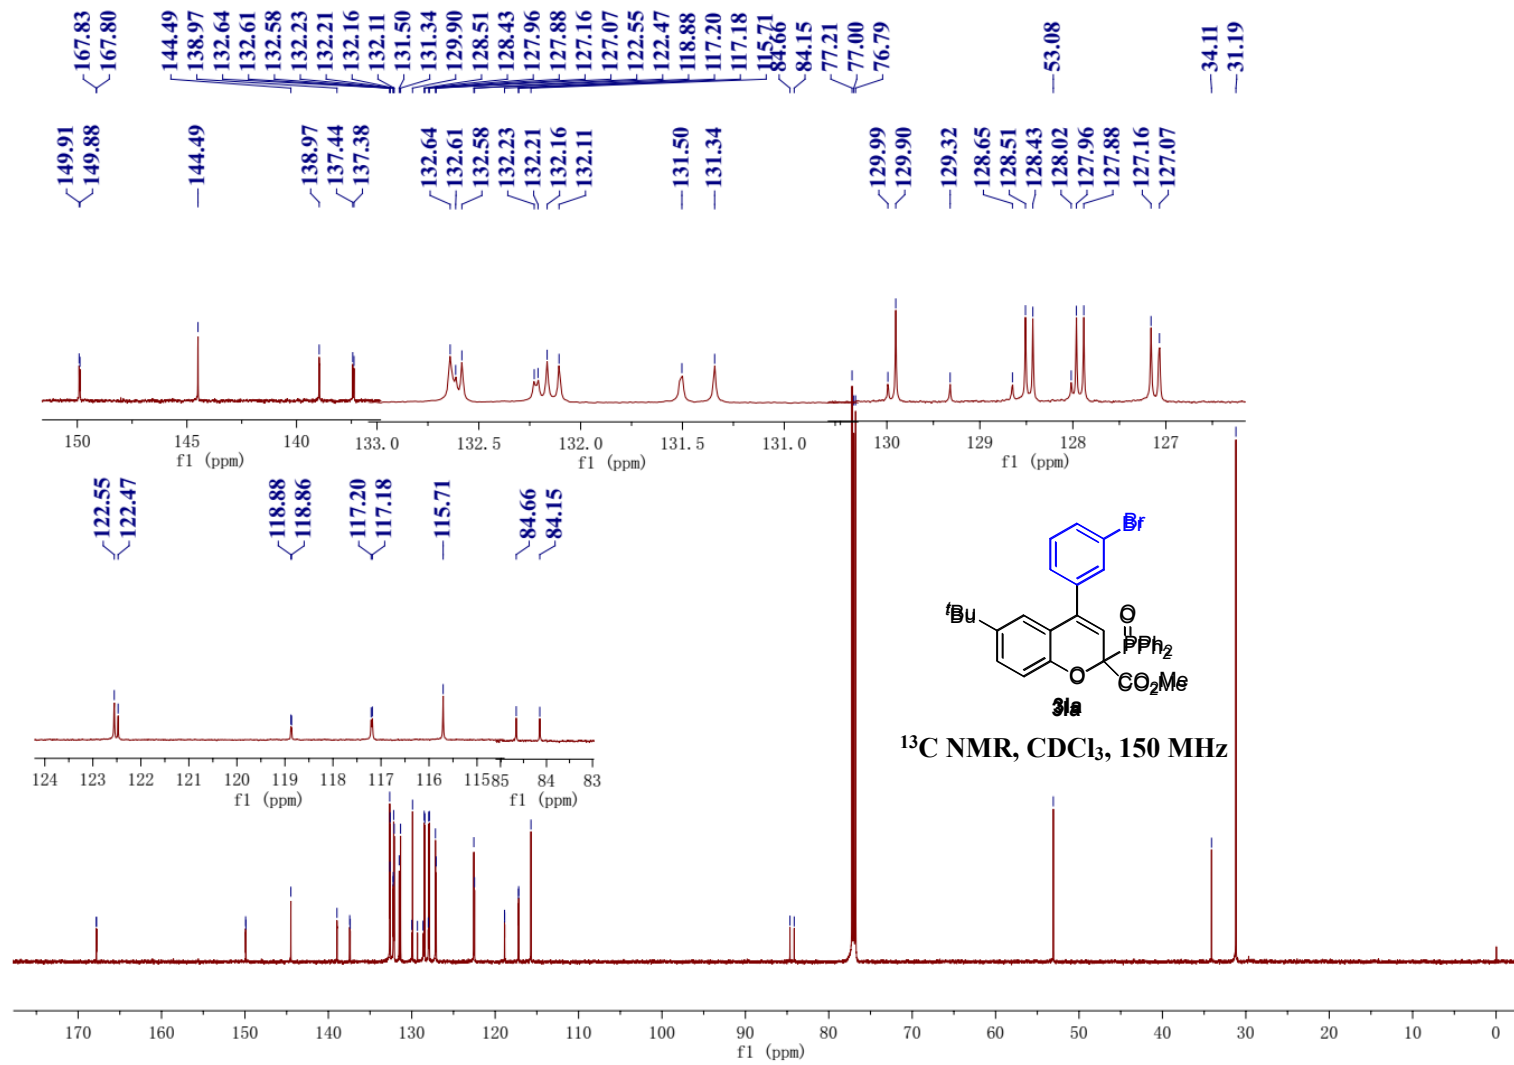

— 28.25

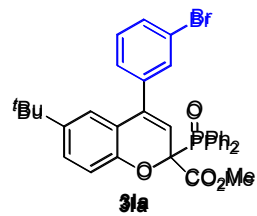

<sup>31</sup>P NMR, CDCl<sub>3</sub>, 243 MHz

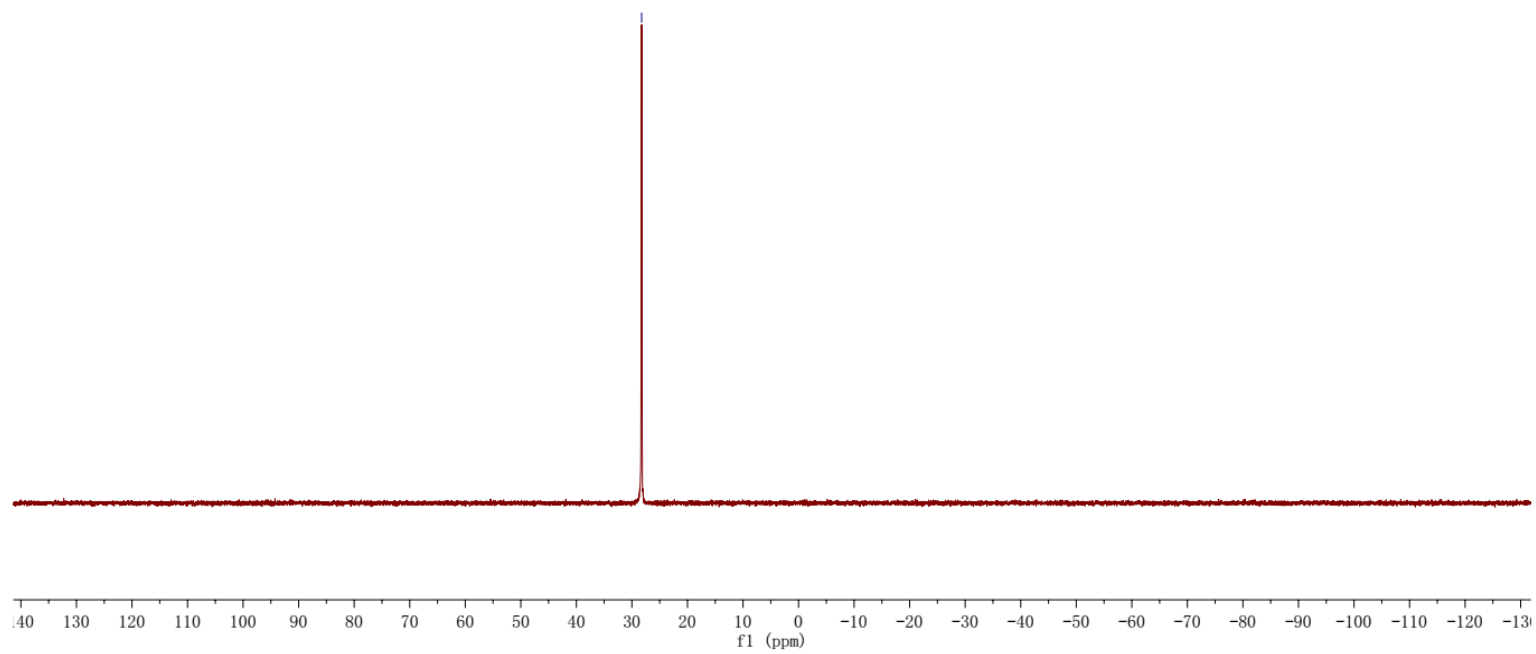

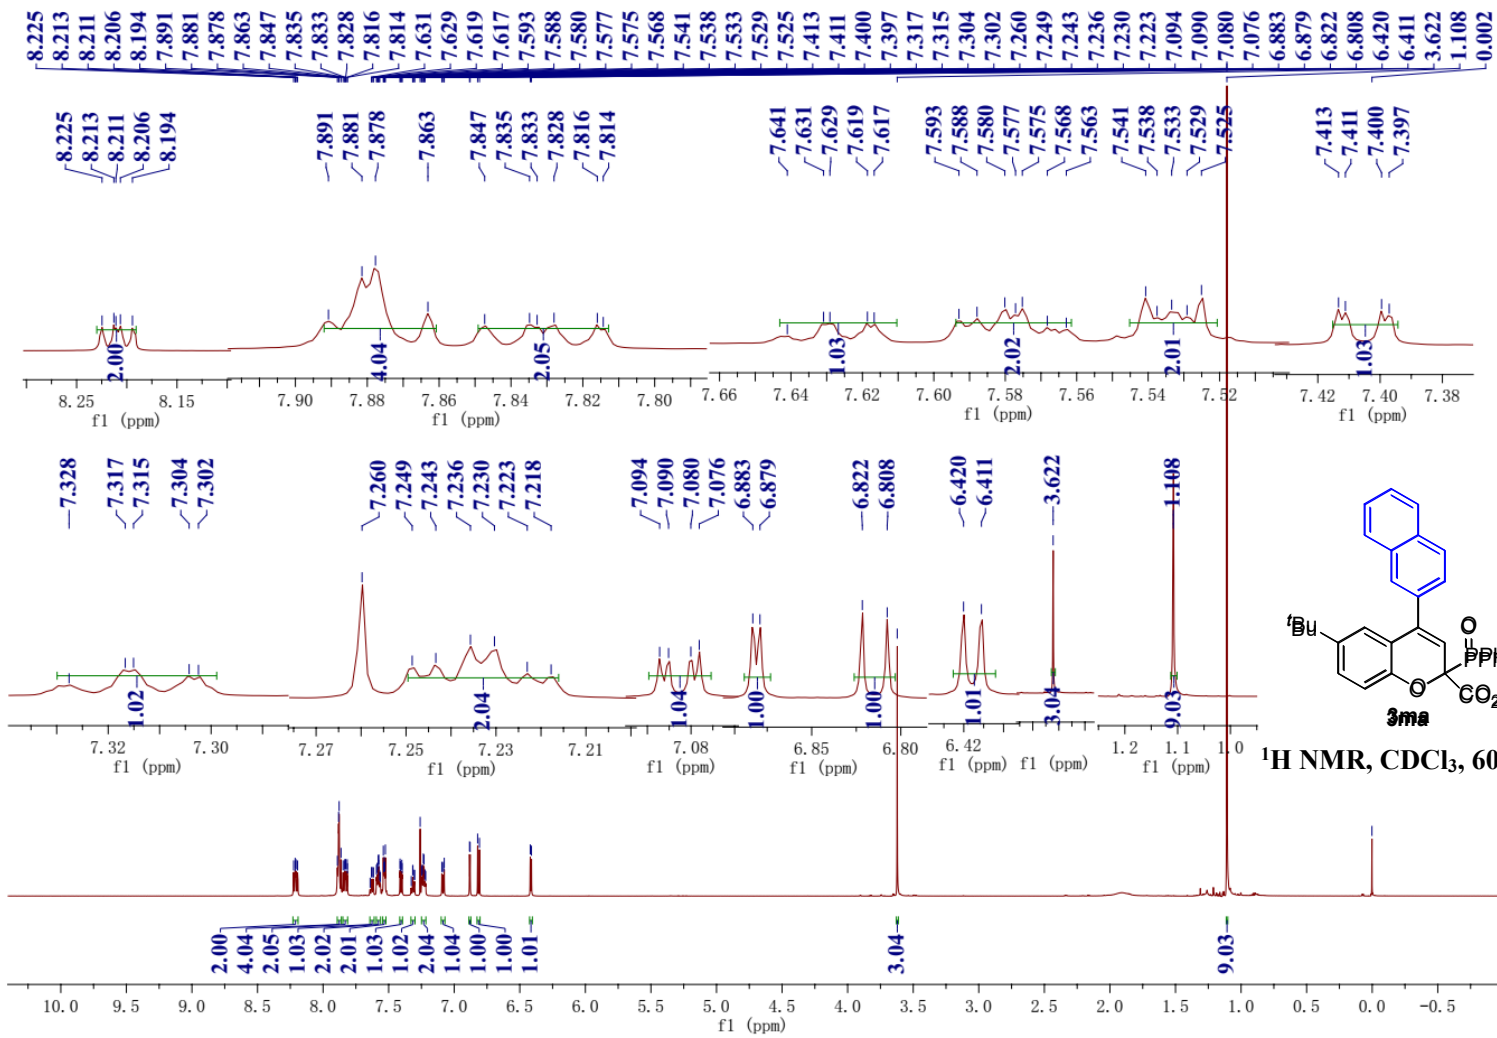

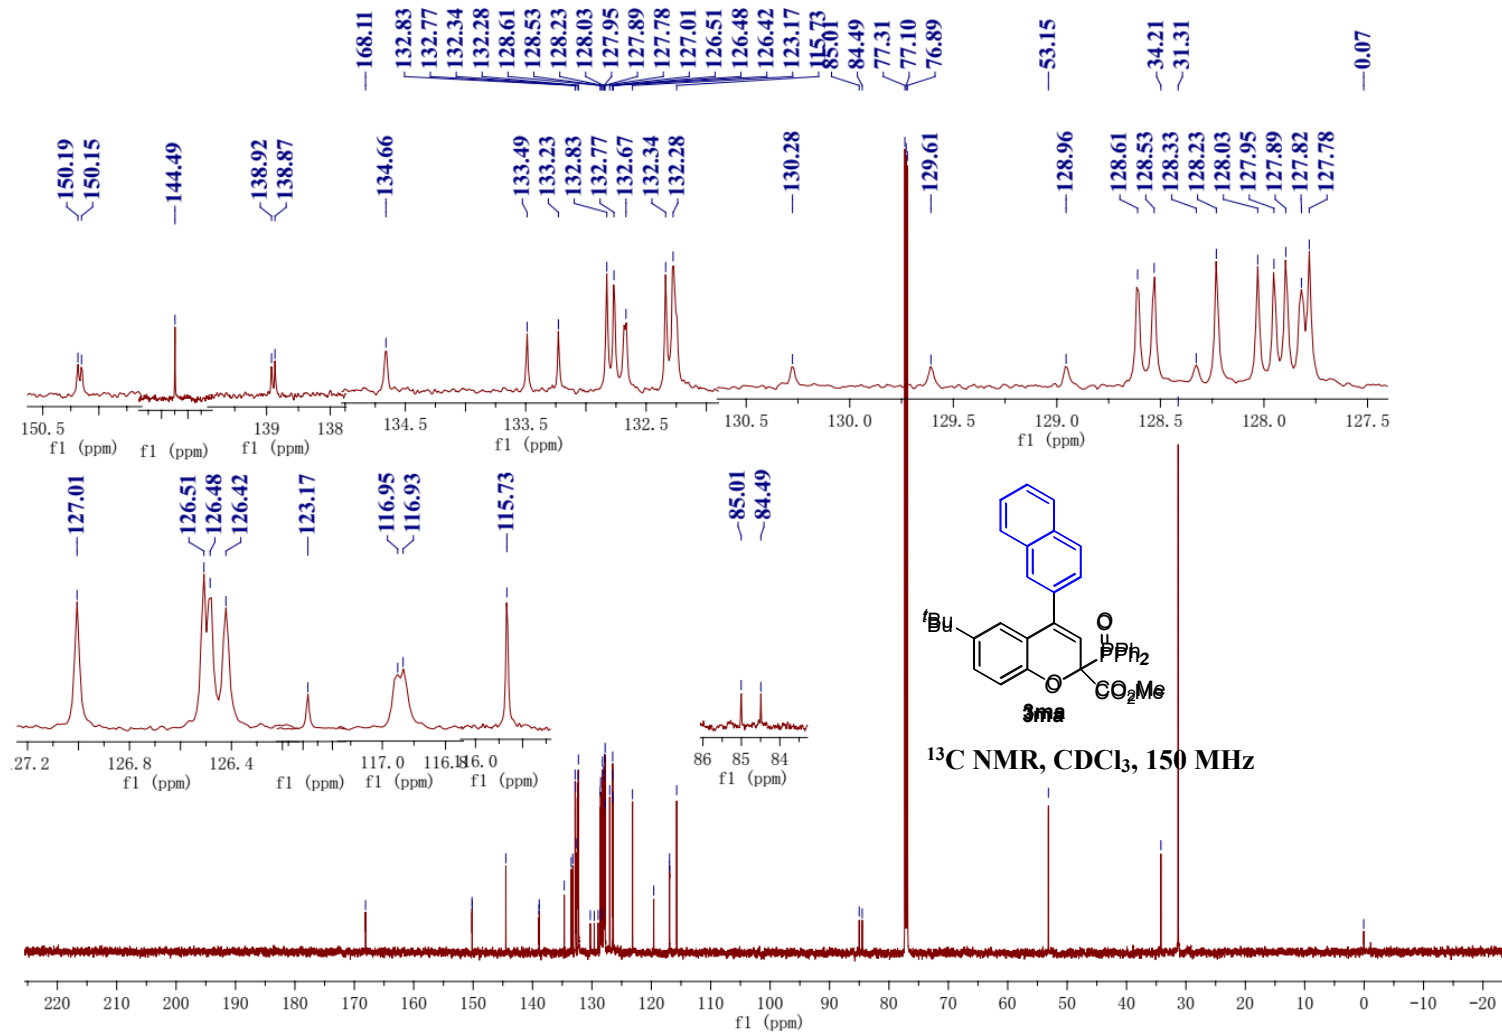

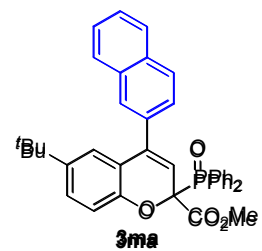

**<sup>31</sup>P NMR, CDCl<sub>3</sub>, 243 MHz**

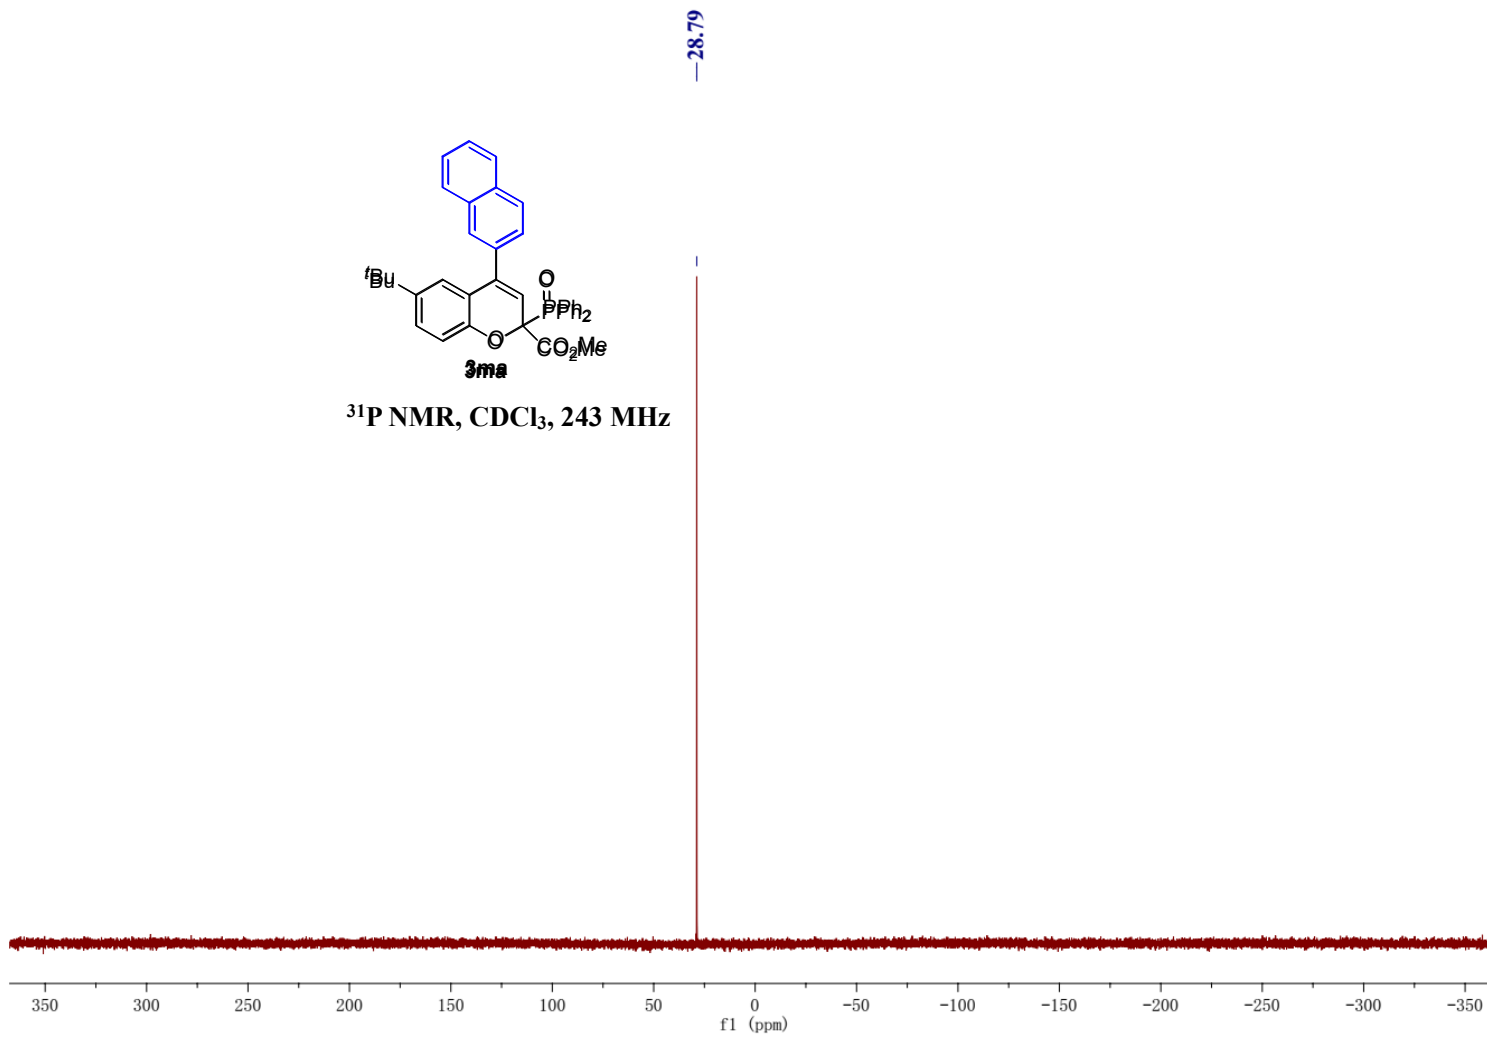

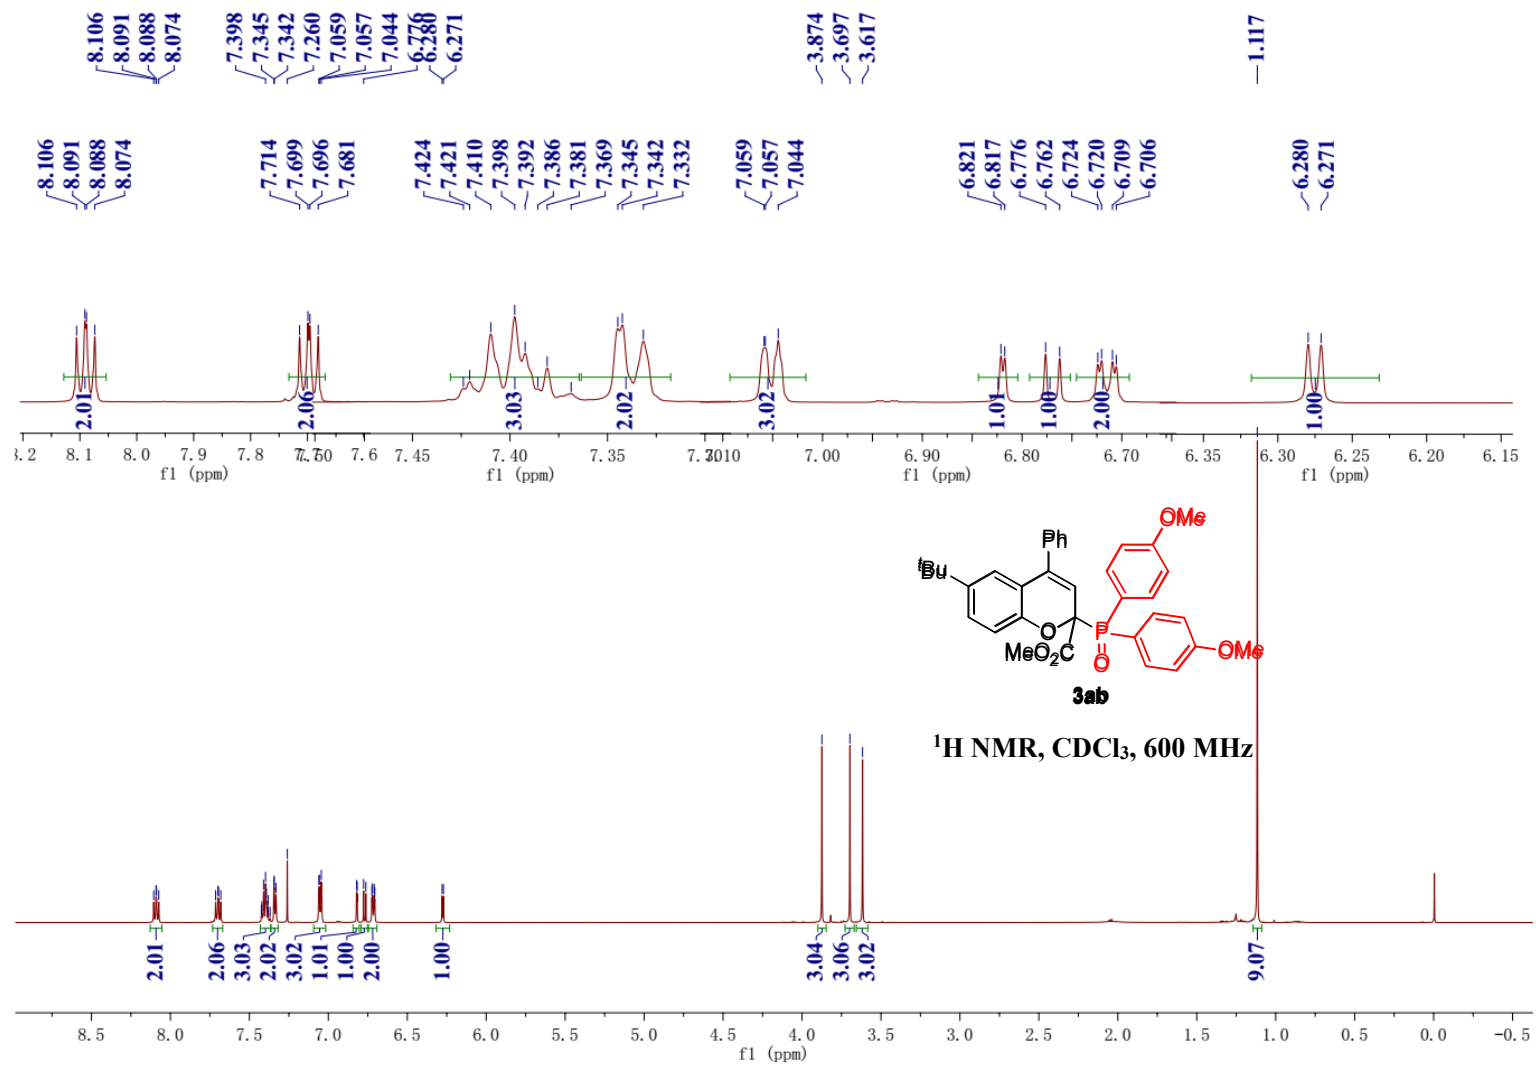

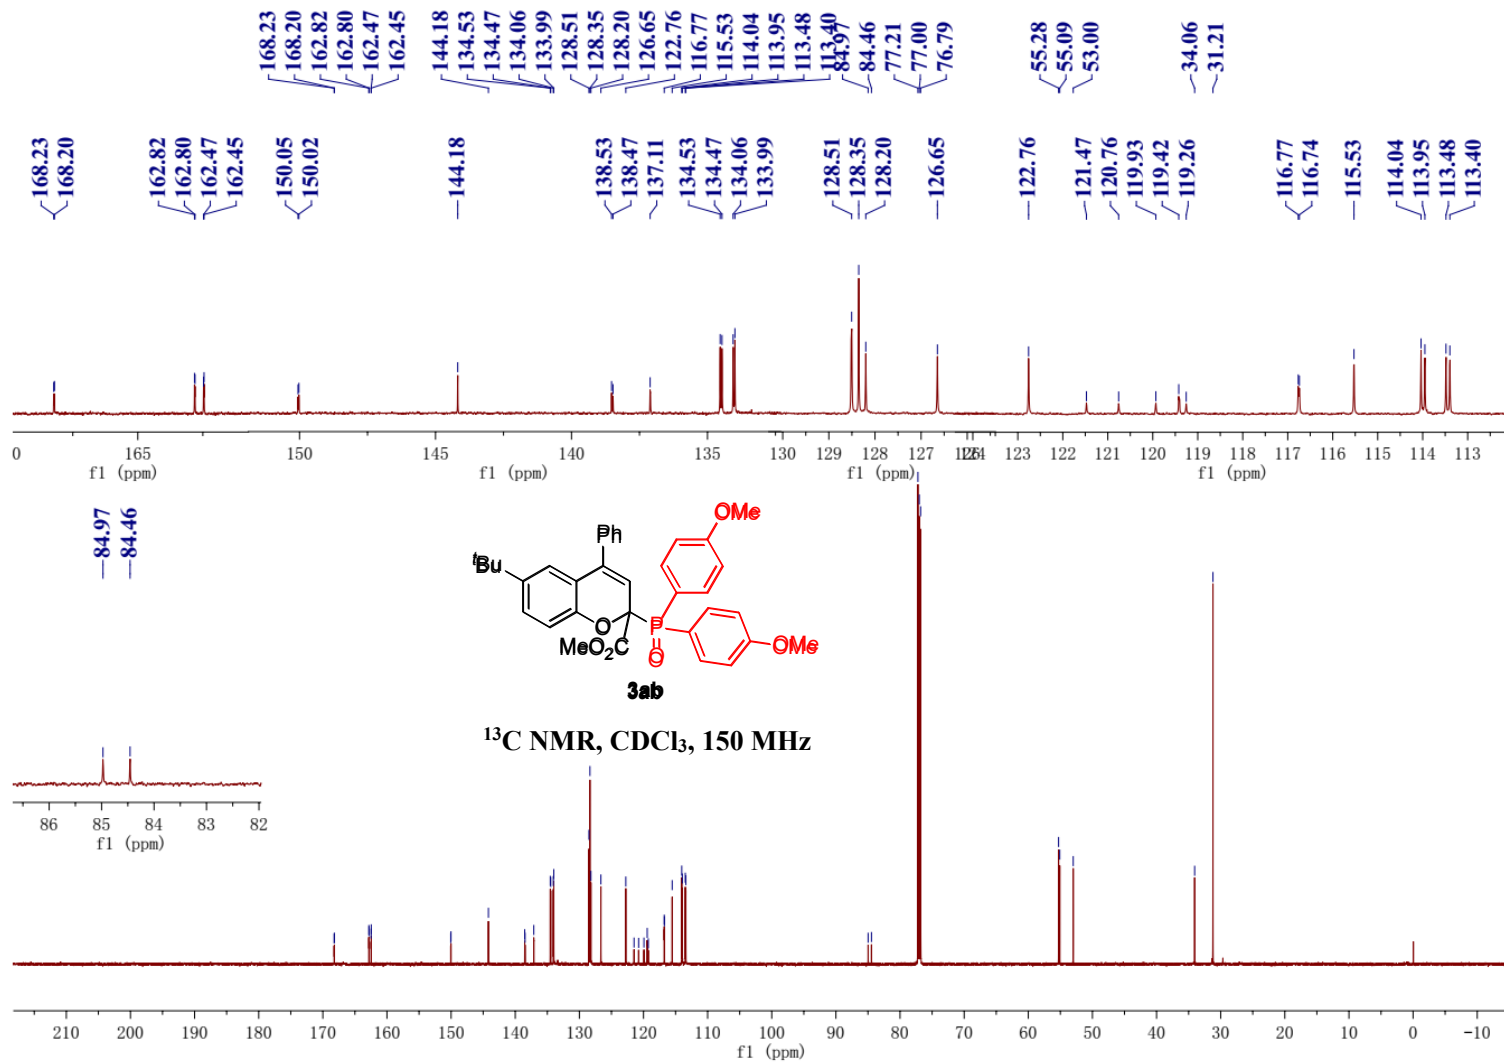

—28.34

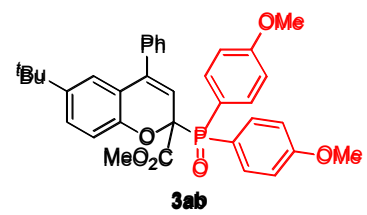

<sup>31</sup>P NMR, CDCl<sub>3</sub>, 243 MHz

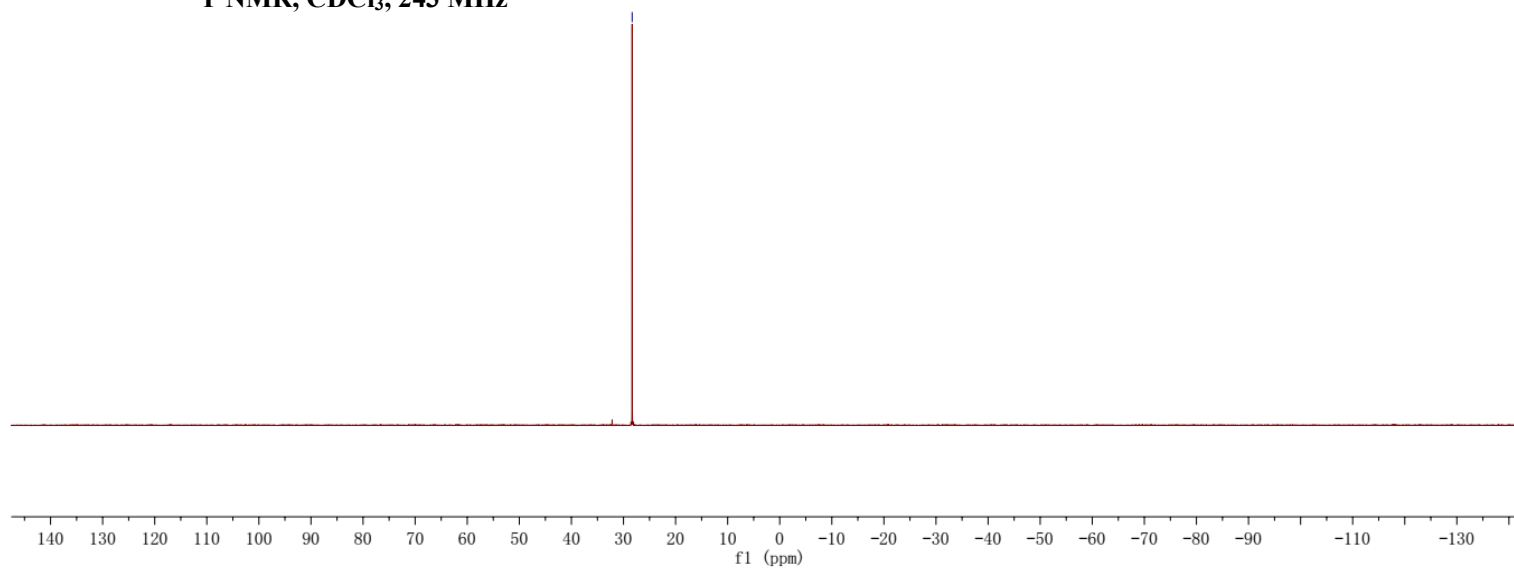



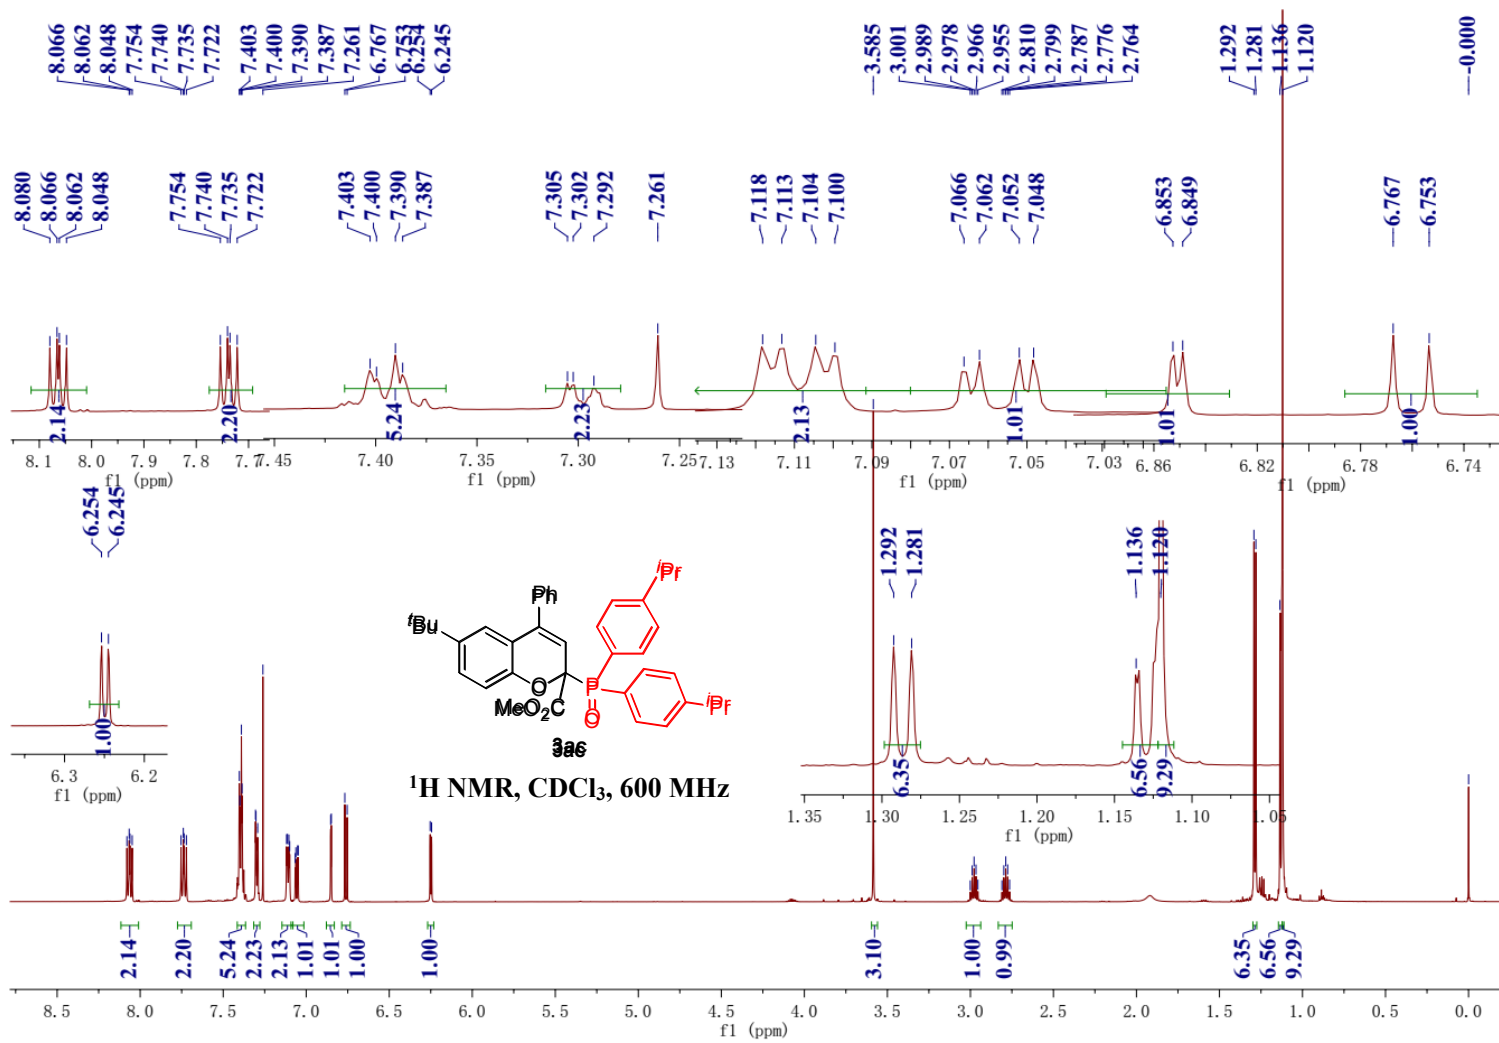

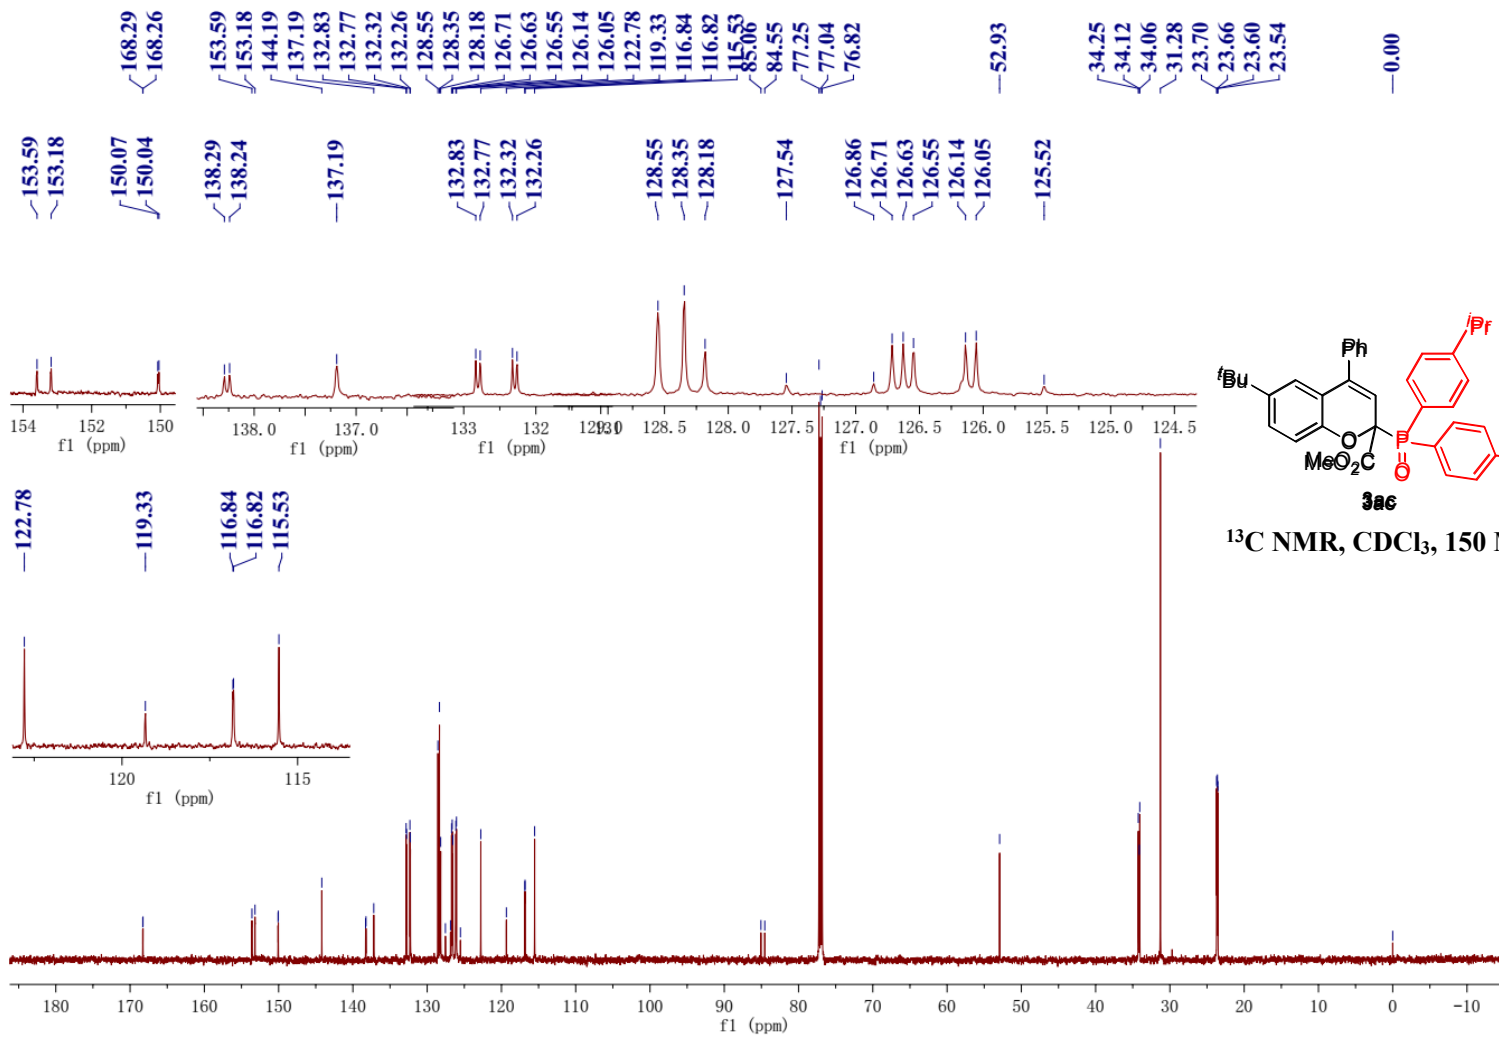

-29.44

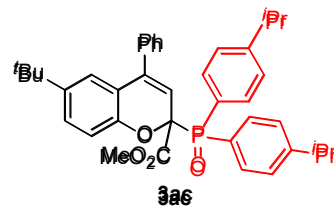

<sup>31</sup>P NMR, CDCl<sub>3</sub>, 243 MHz

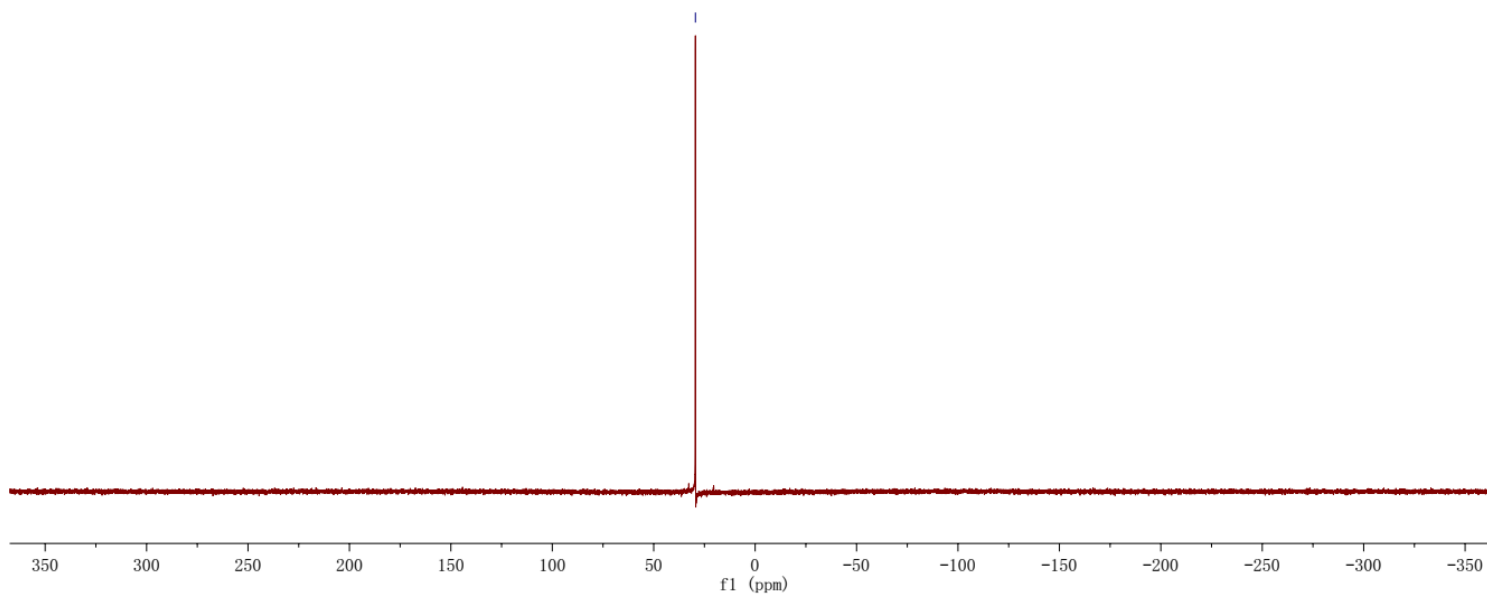

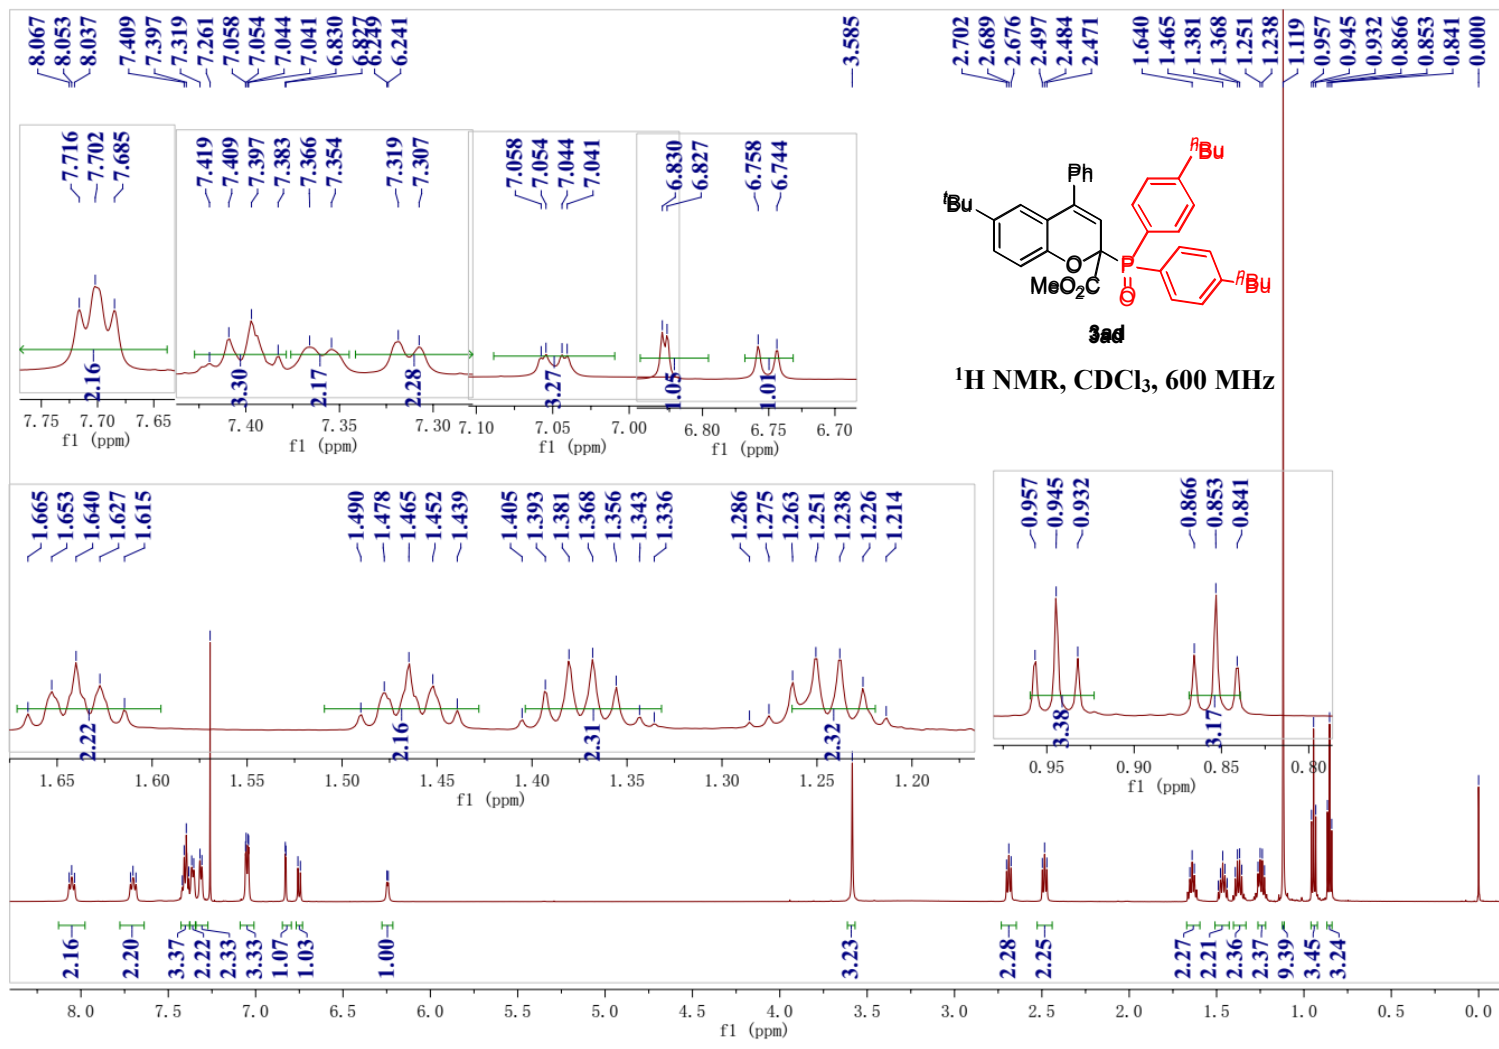

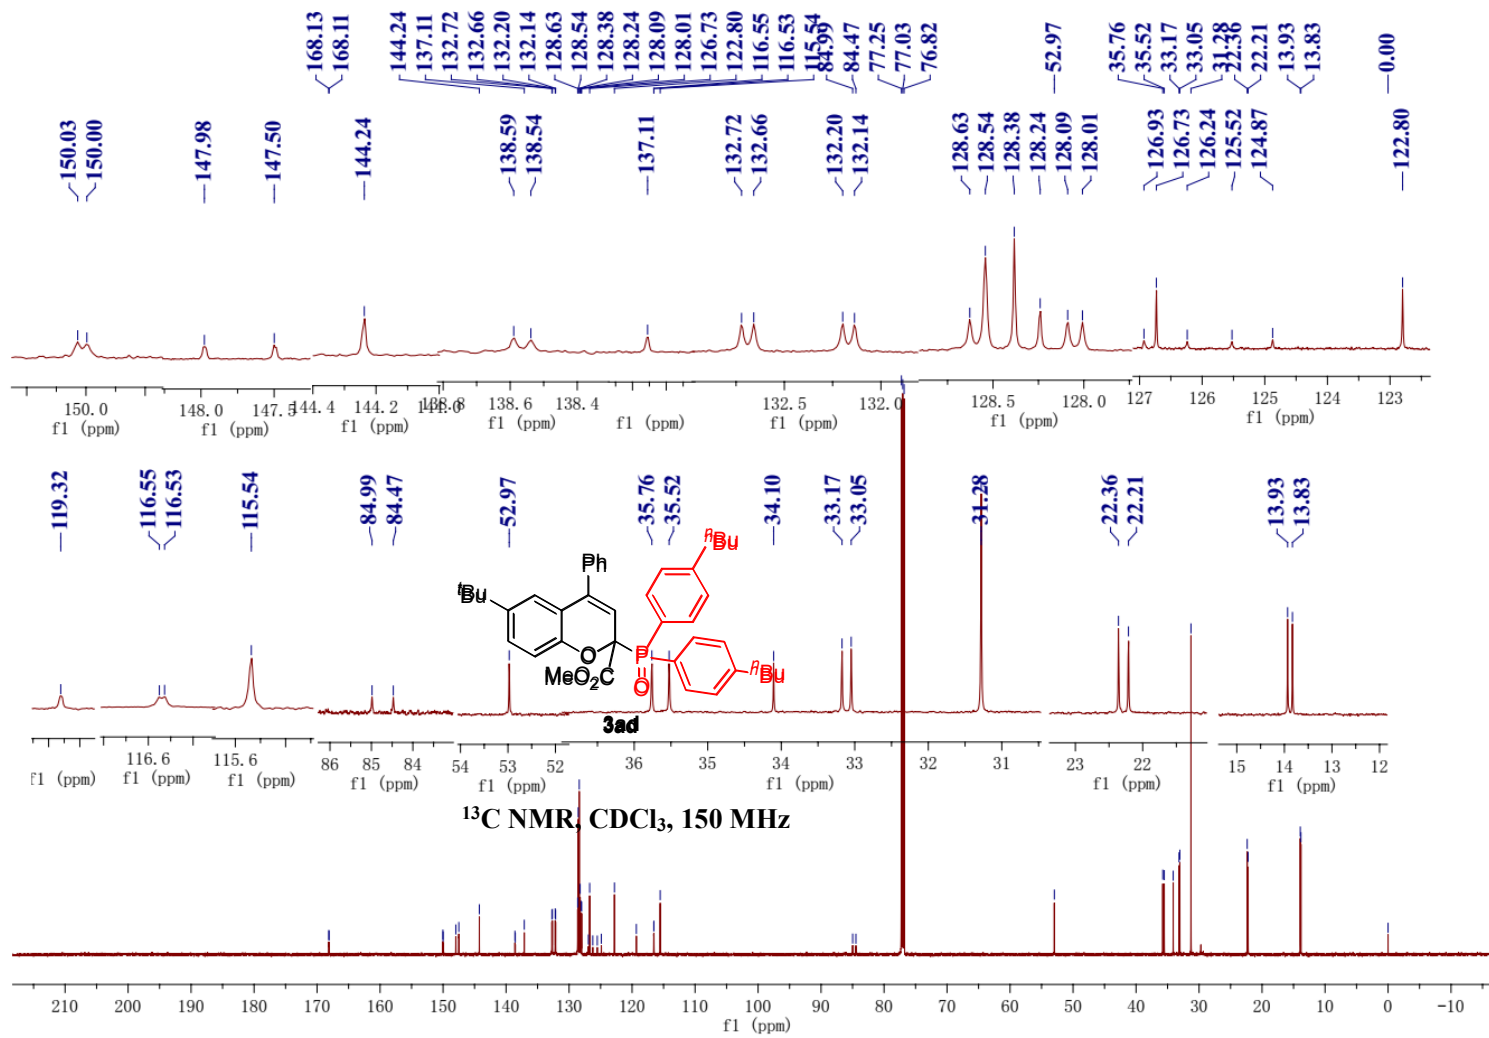

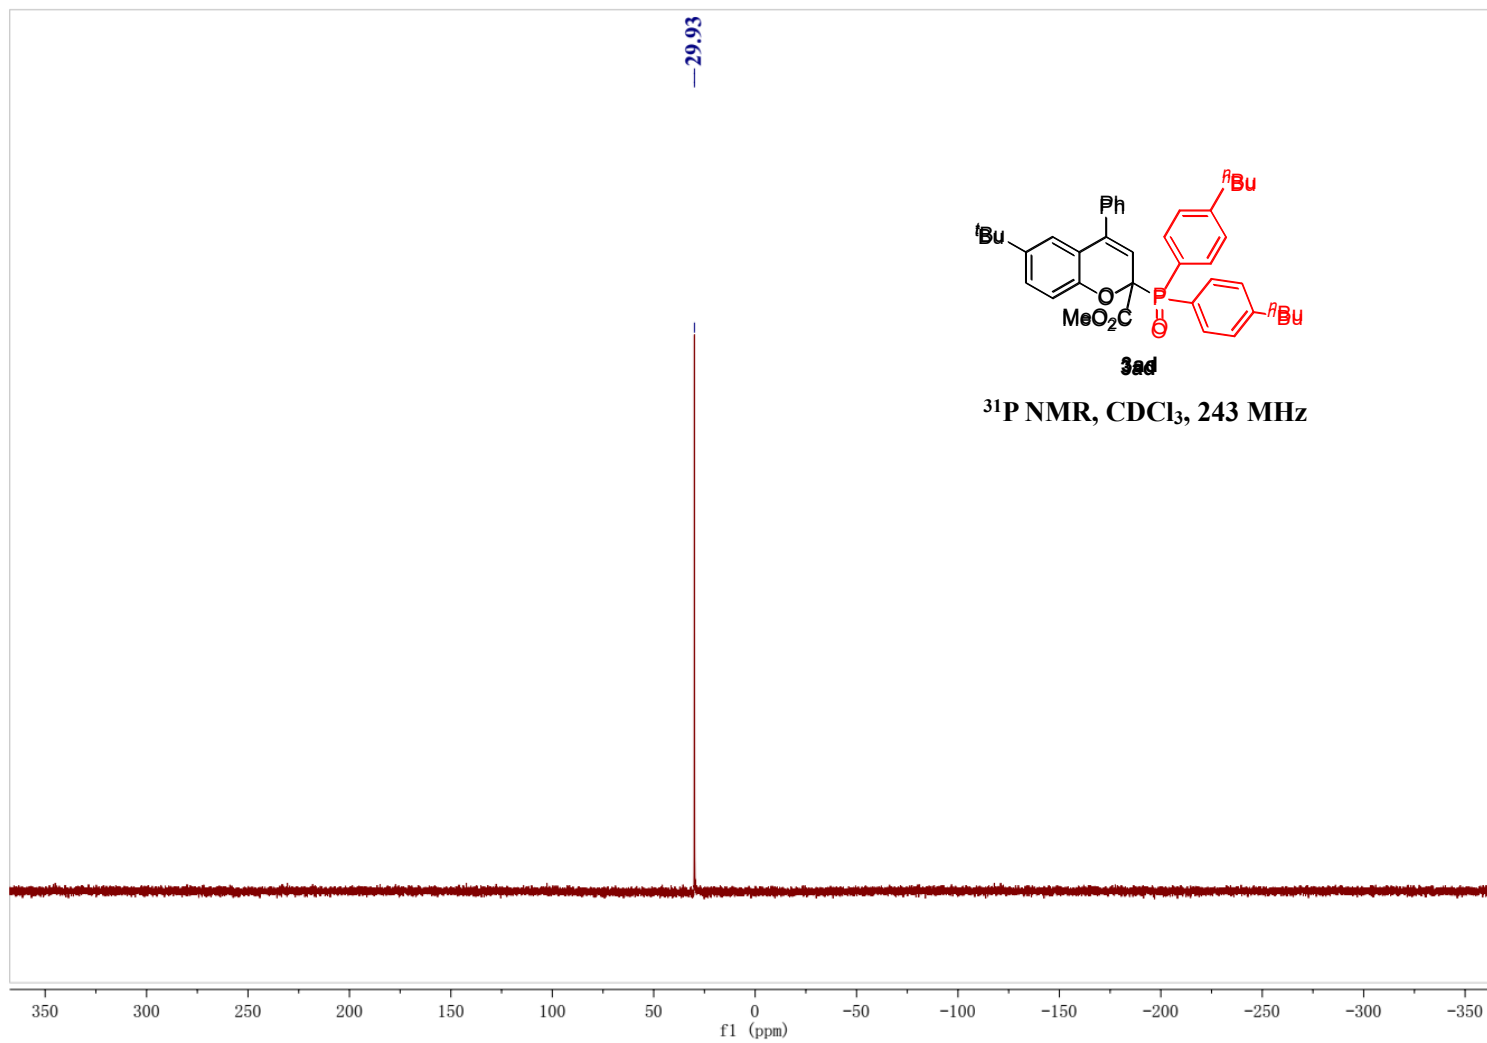

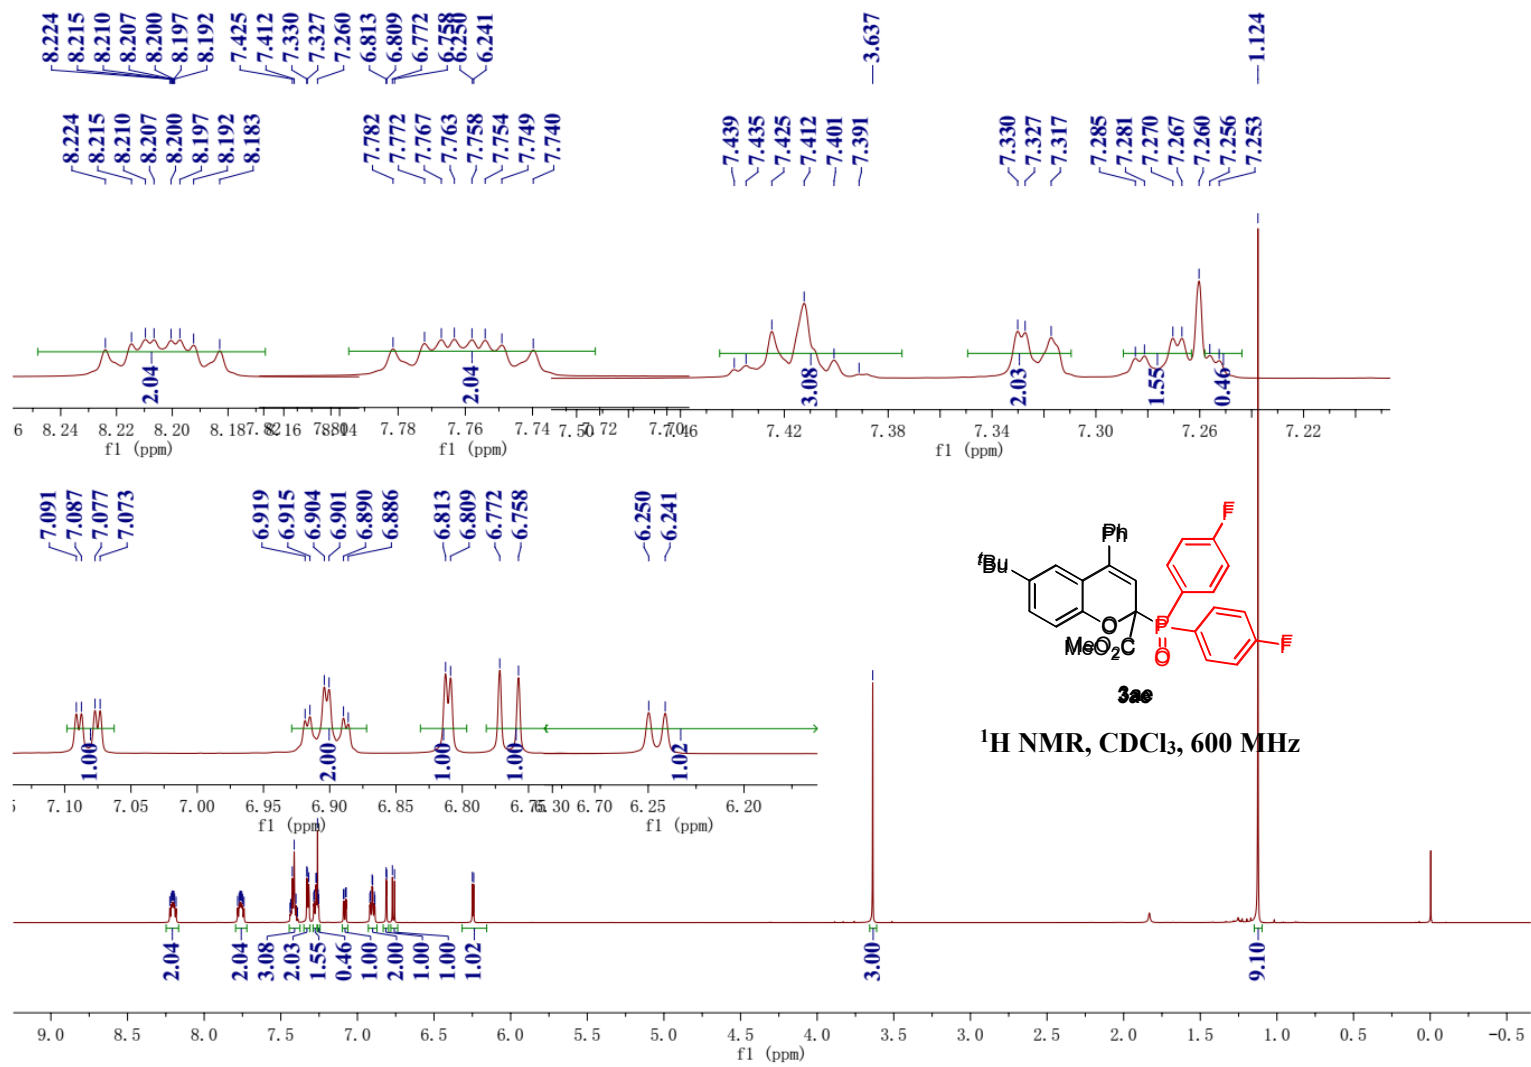

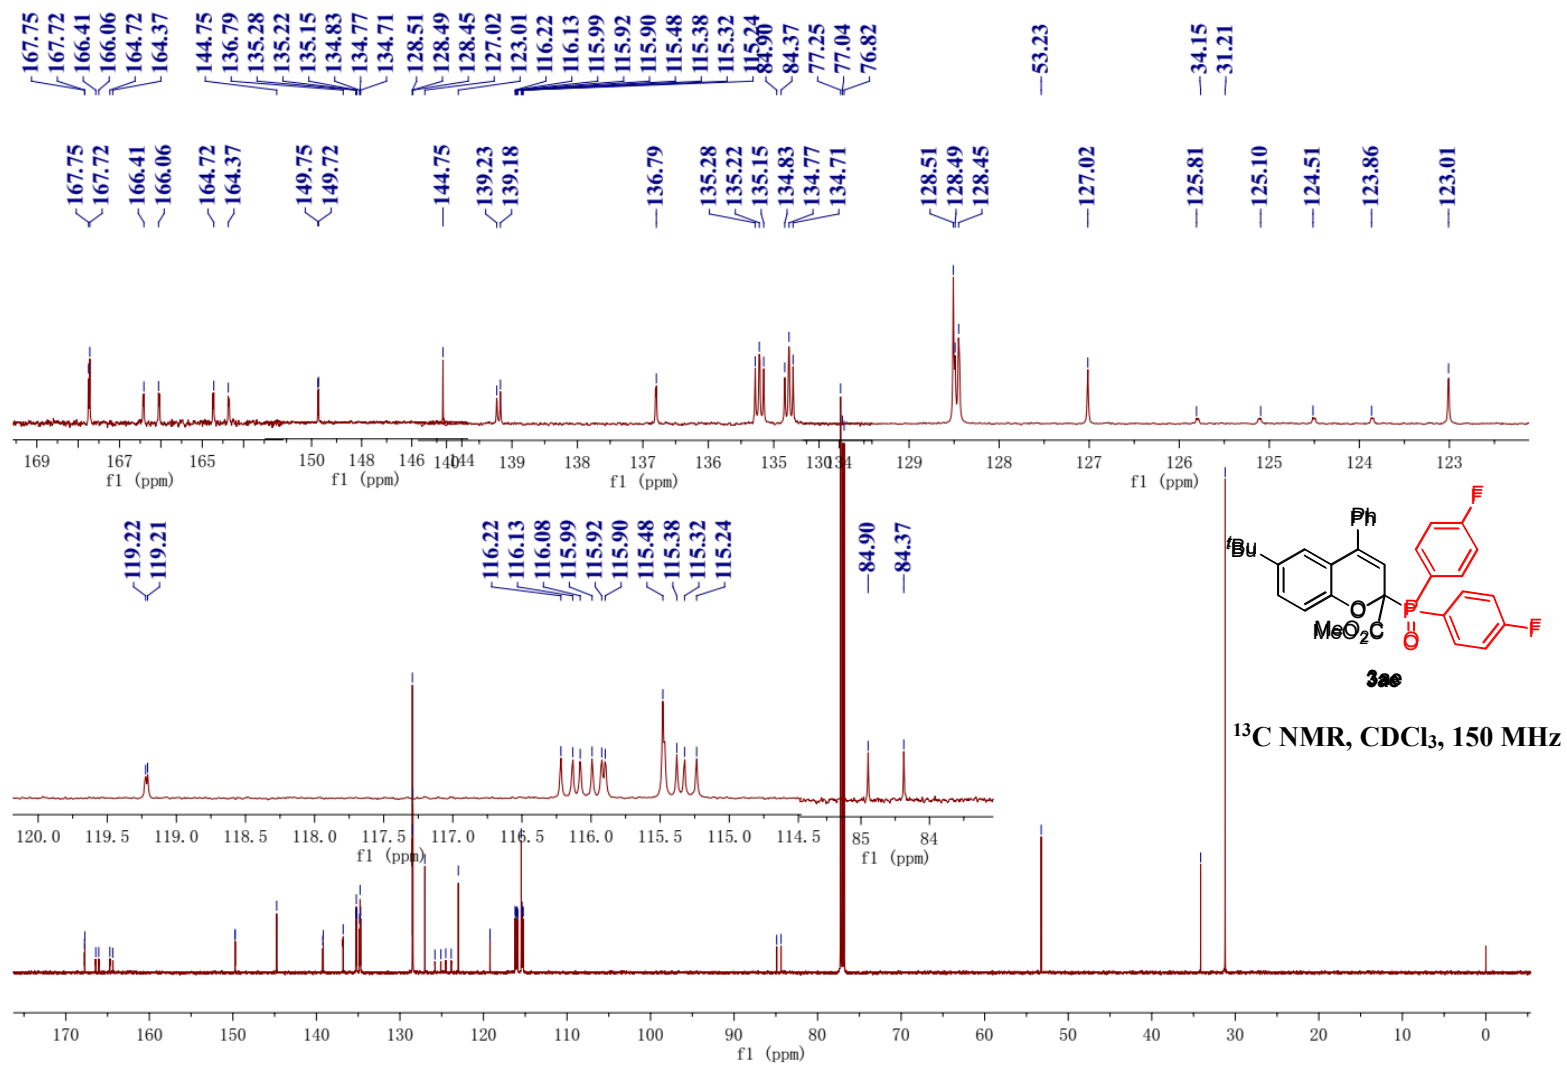



—26.42

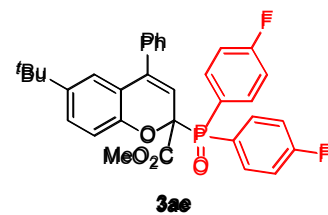

<sup>31</sup>P NMR, CDCl<sub>3</sub>, 243 MHz

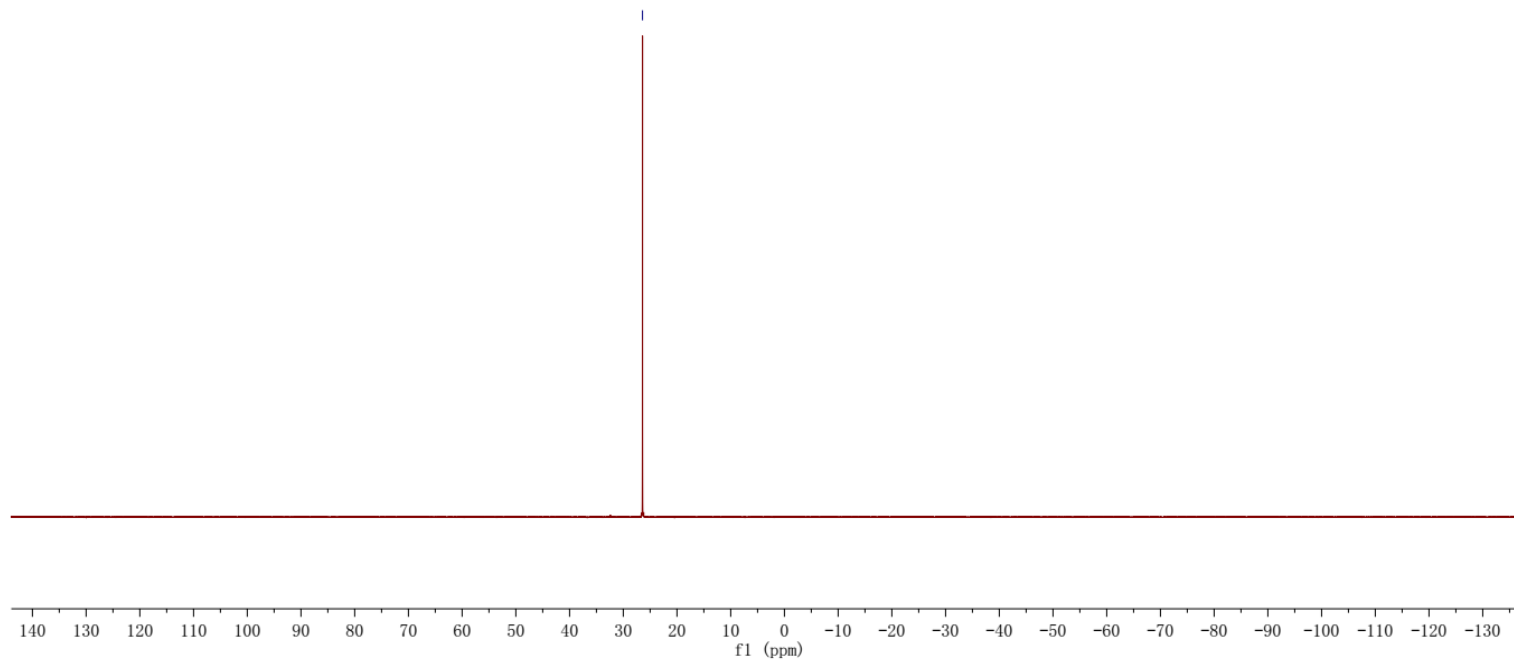

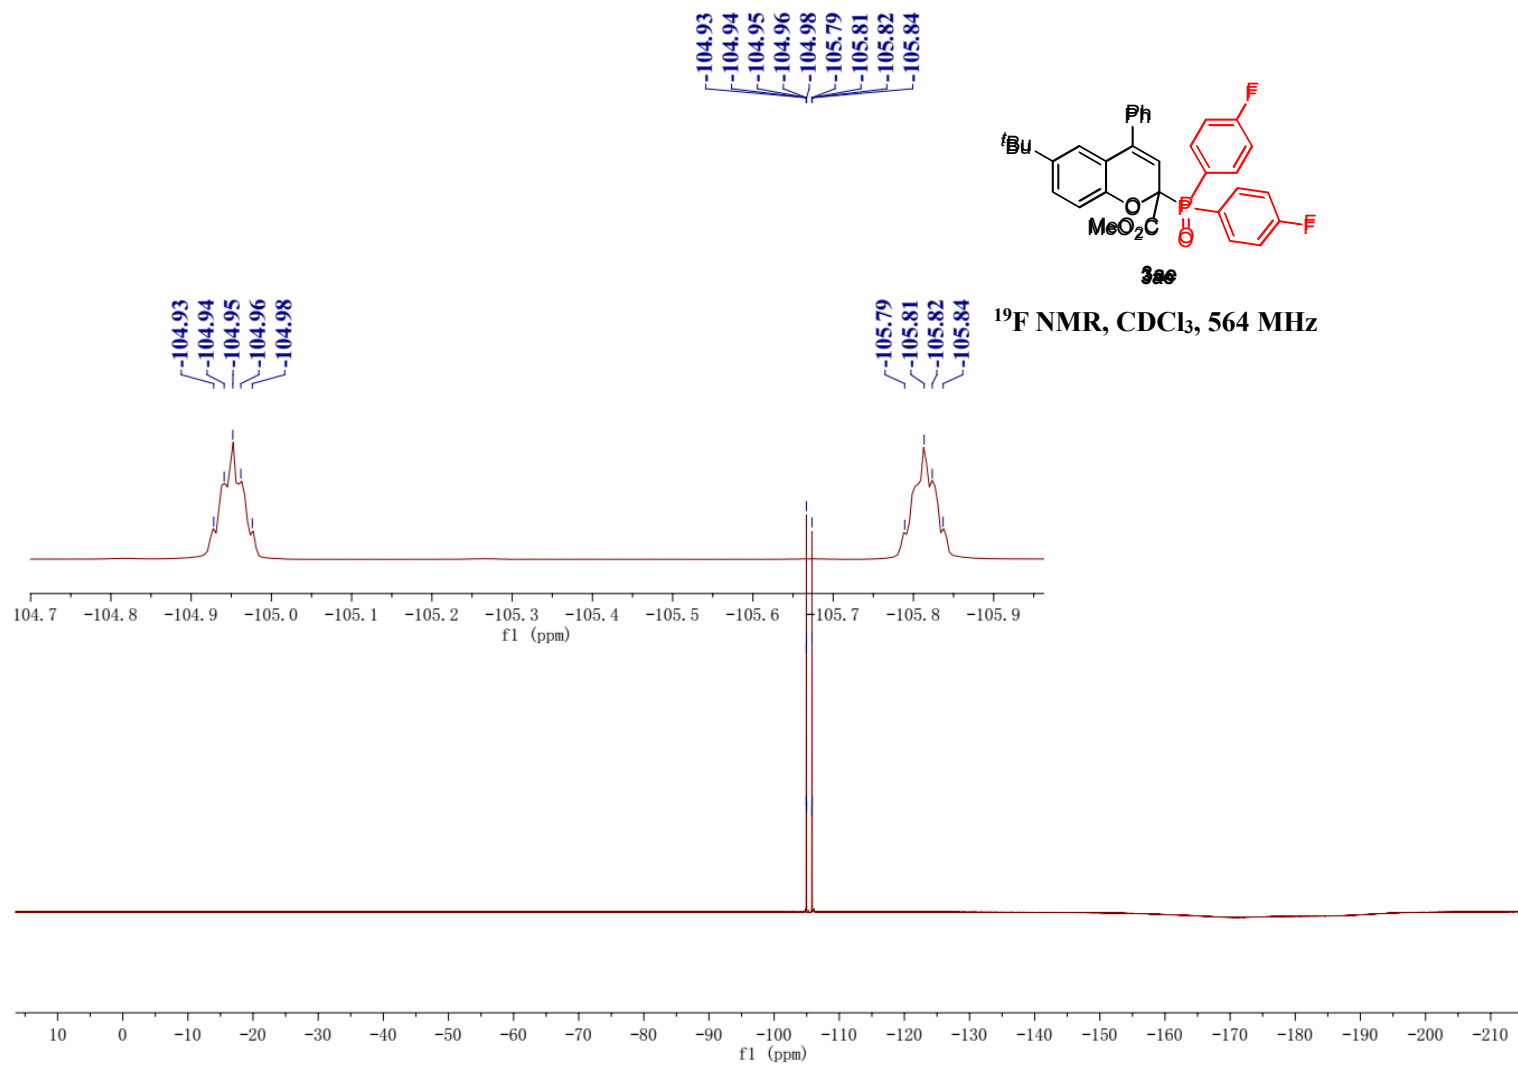

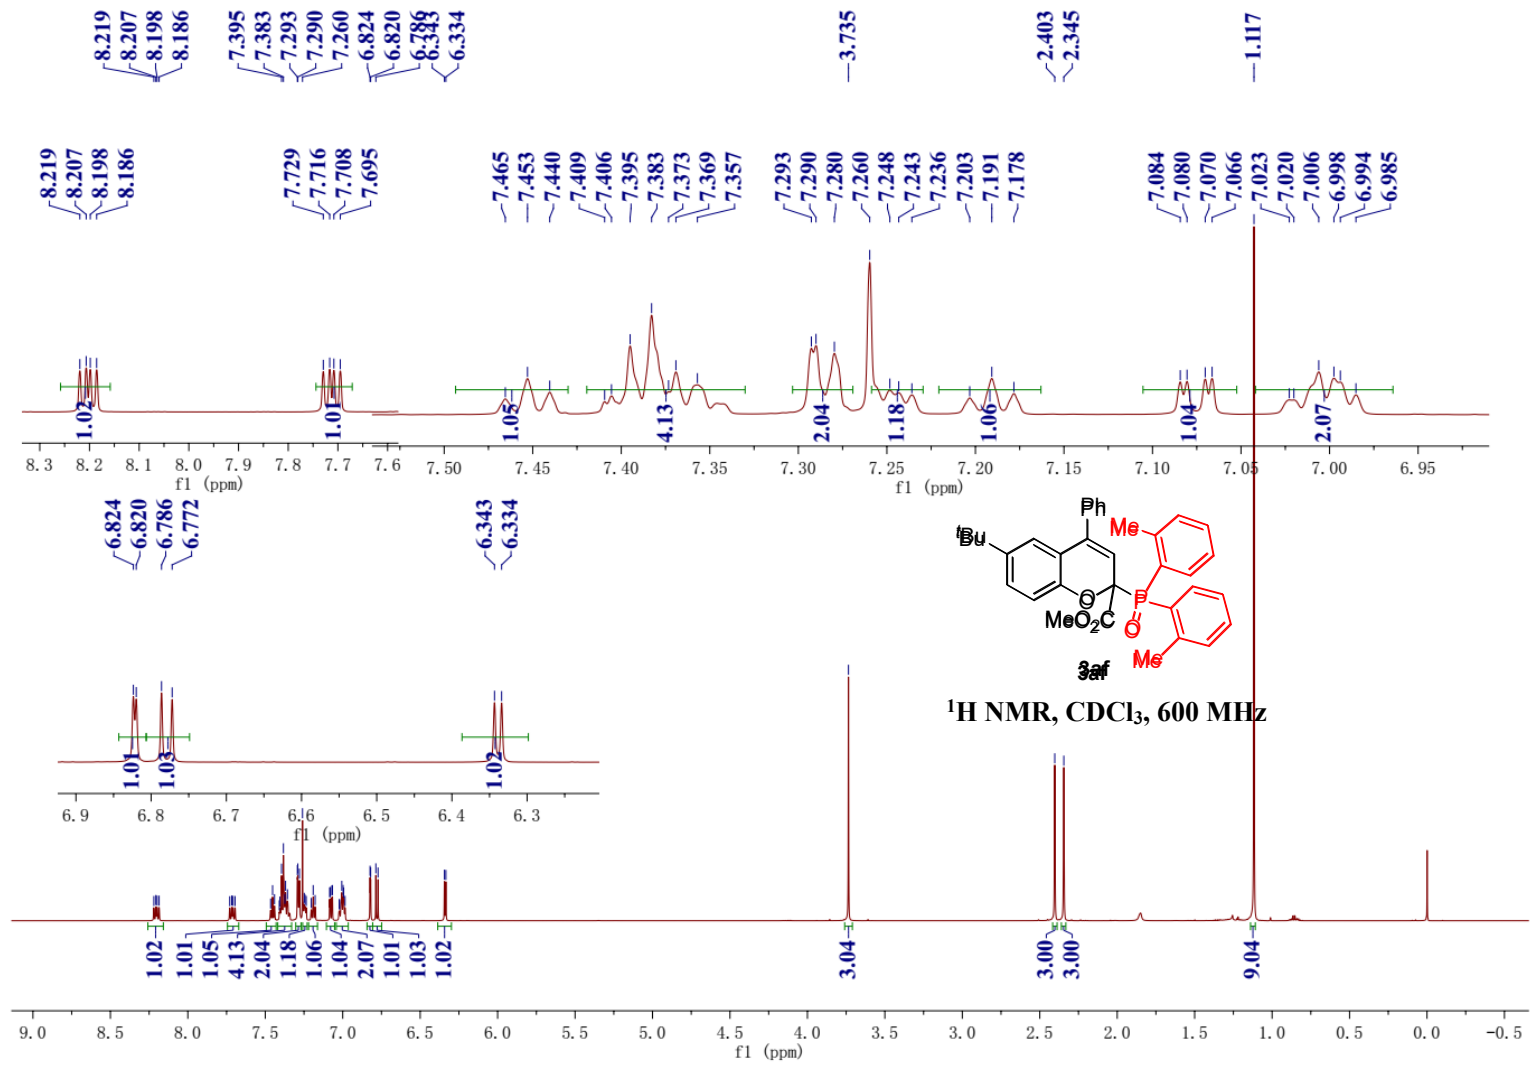

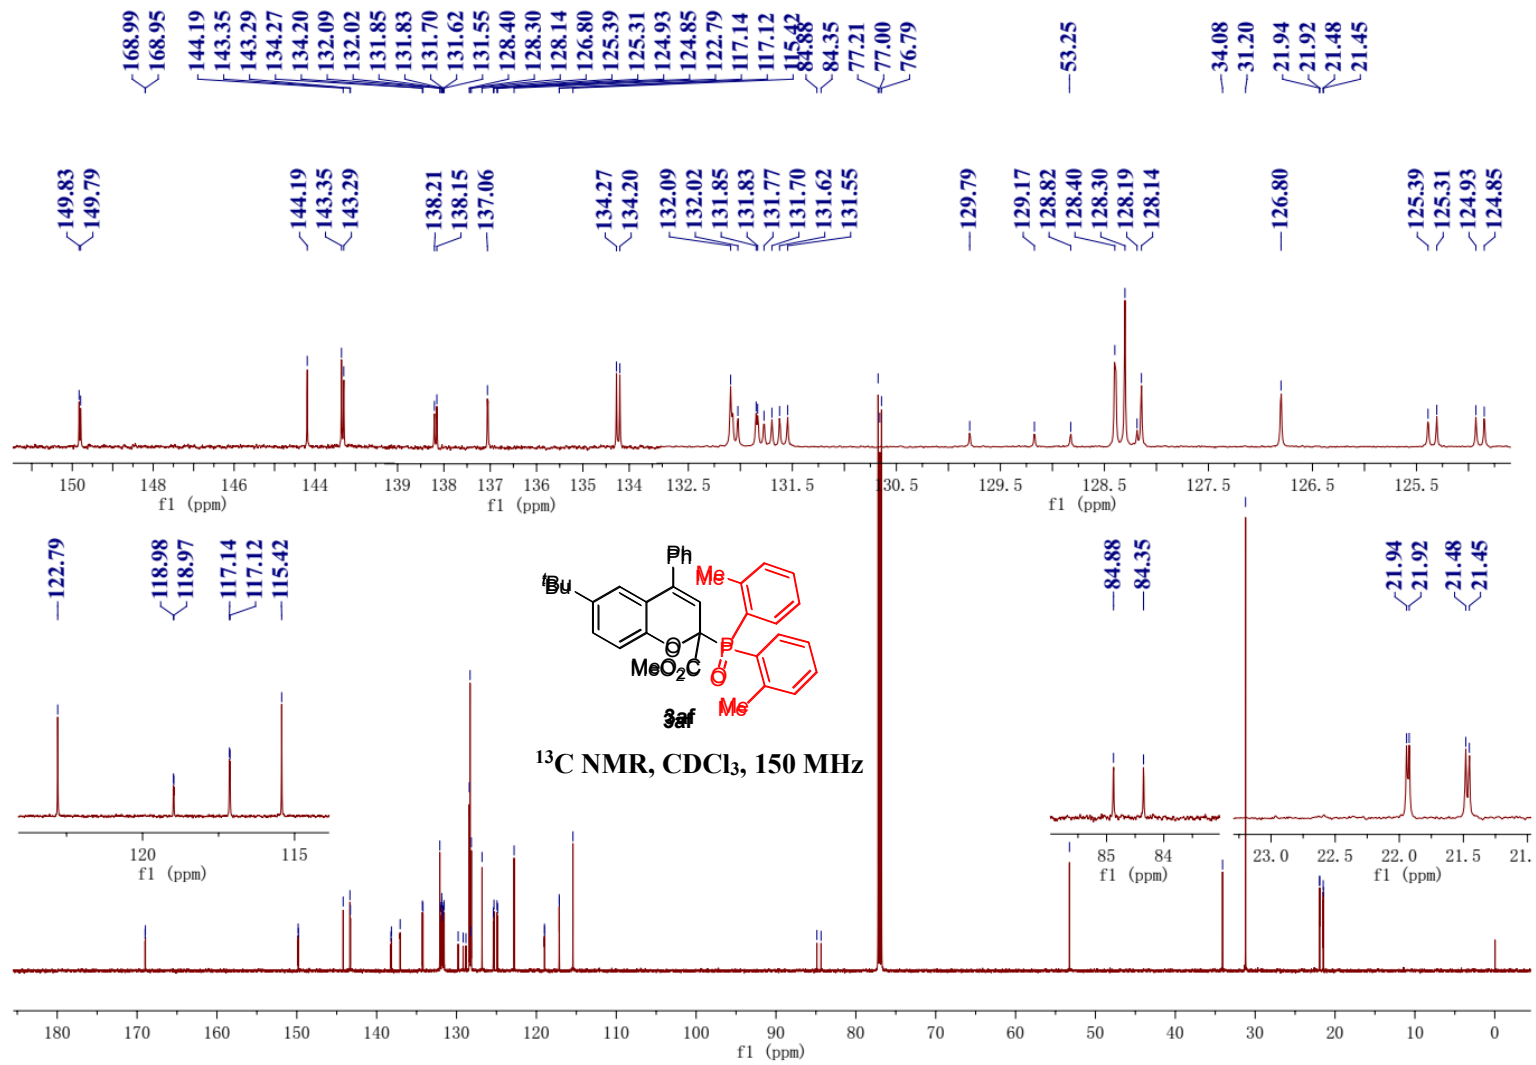

—33.80

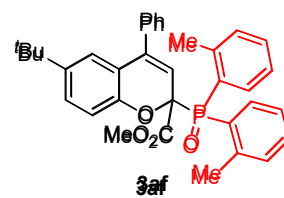

<sup>31</sup>P NMR, CDCl<sub>3</sub>, 243 MHz

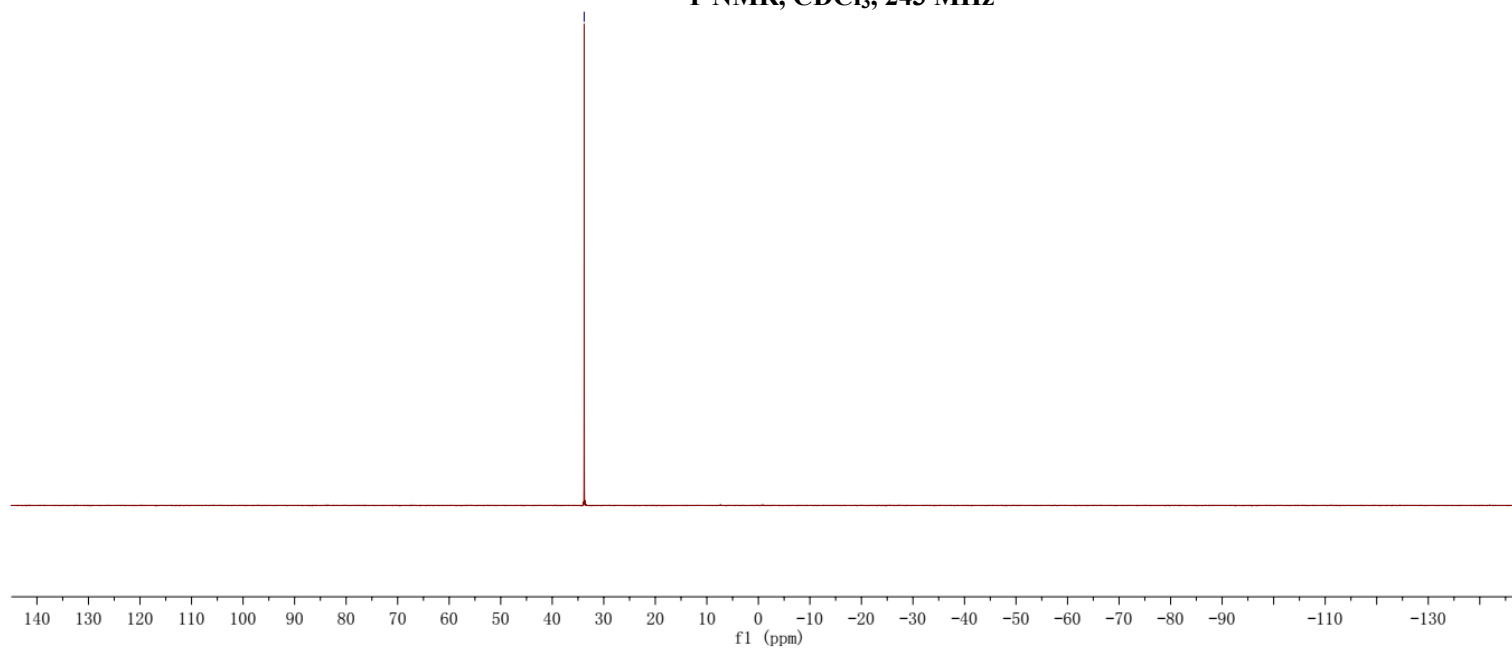

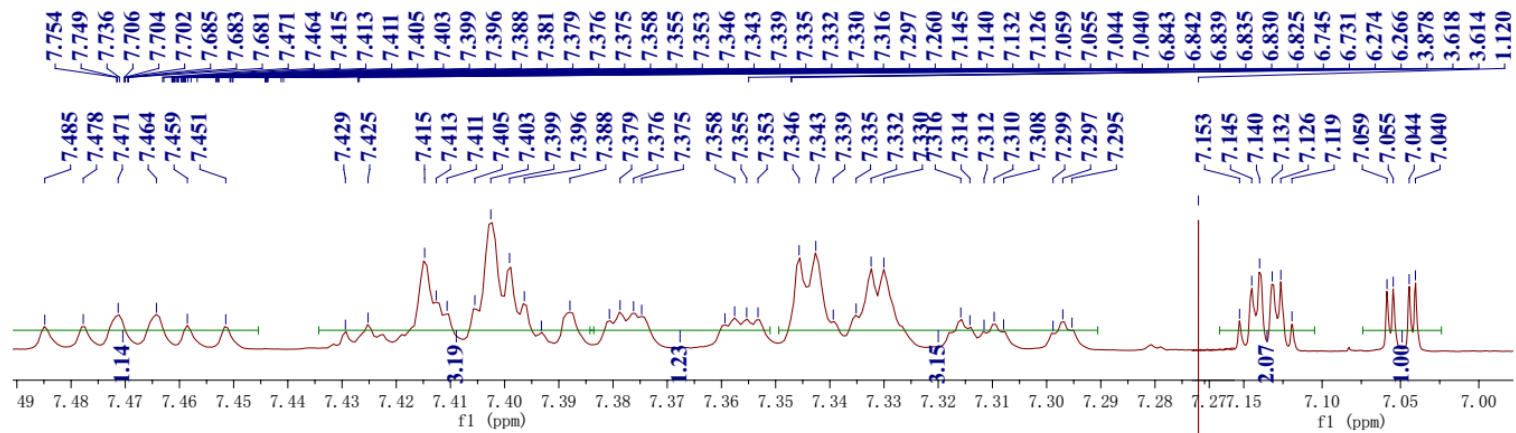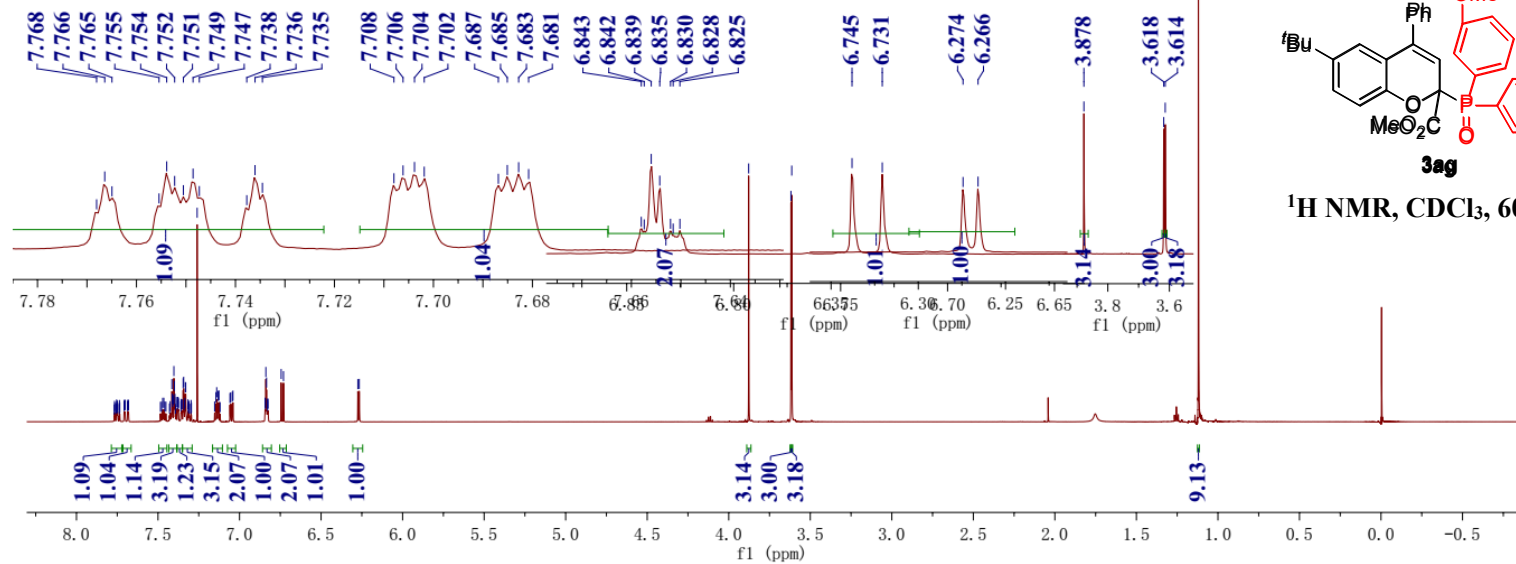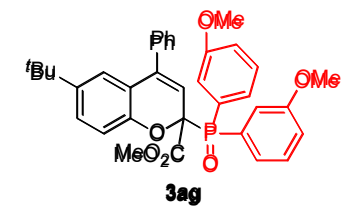

<sup>1</sup>H NMR, CDCl<sub>3</sub>, 600 MHz

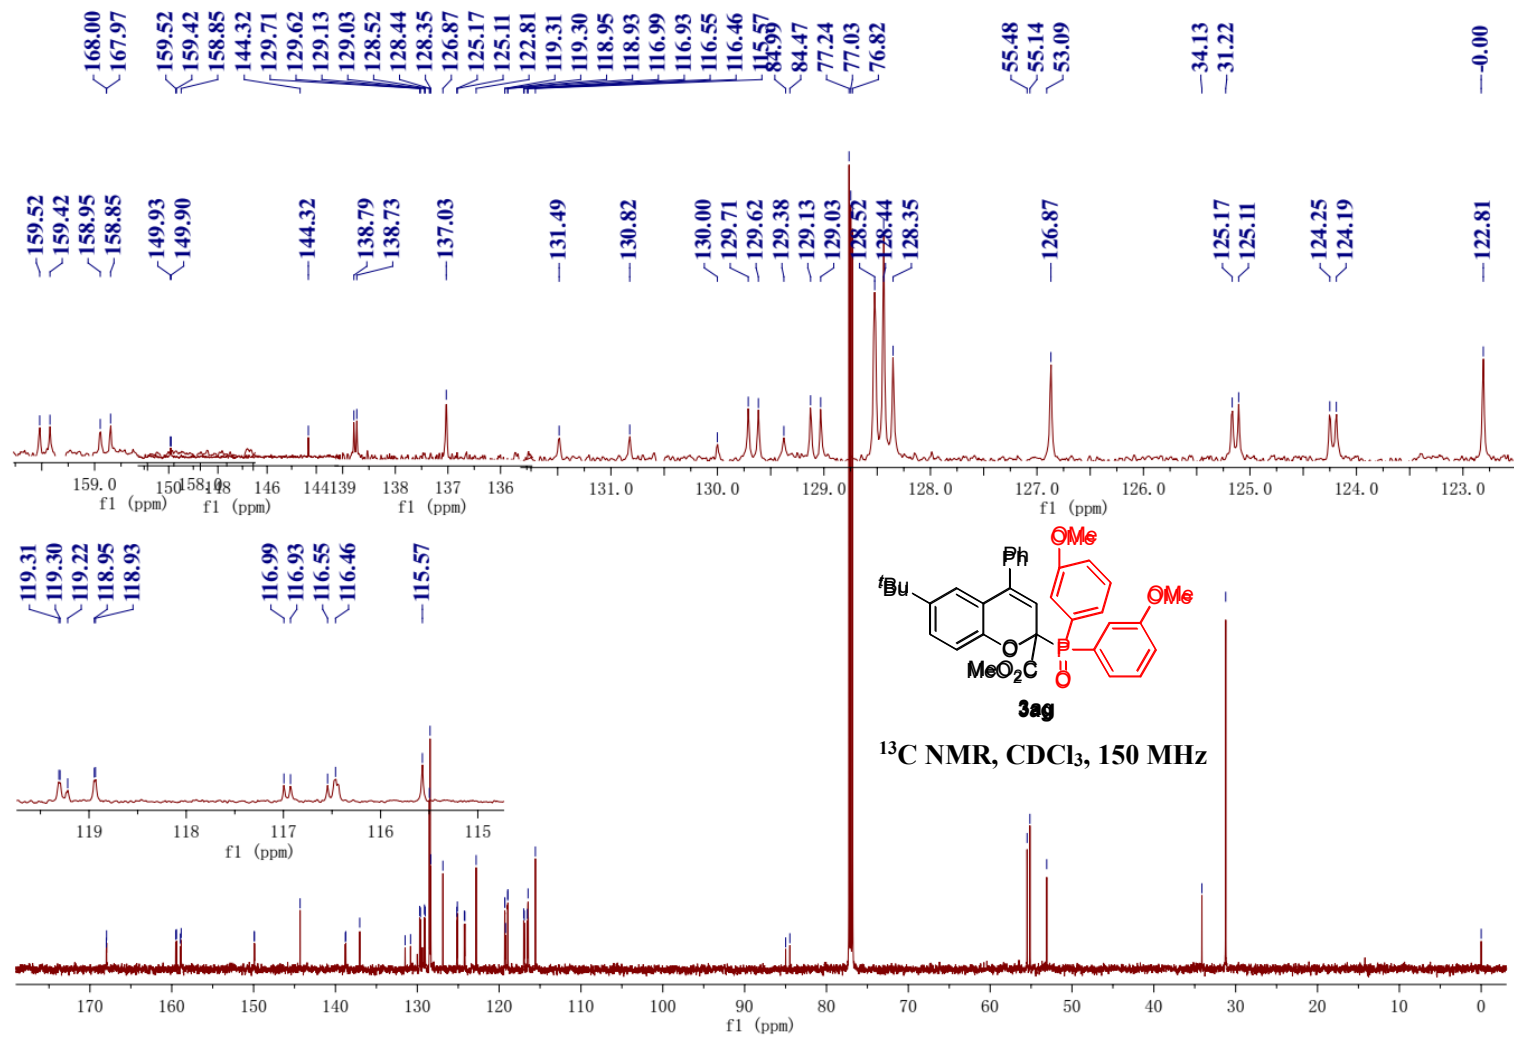

—29.11

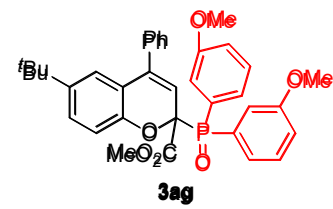

<sup>31</sup>P NMR, CDCl<sub>3</sub>, 243 MHz

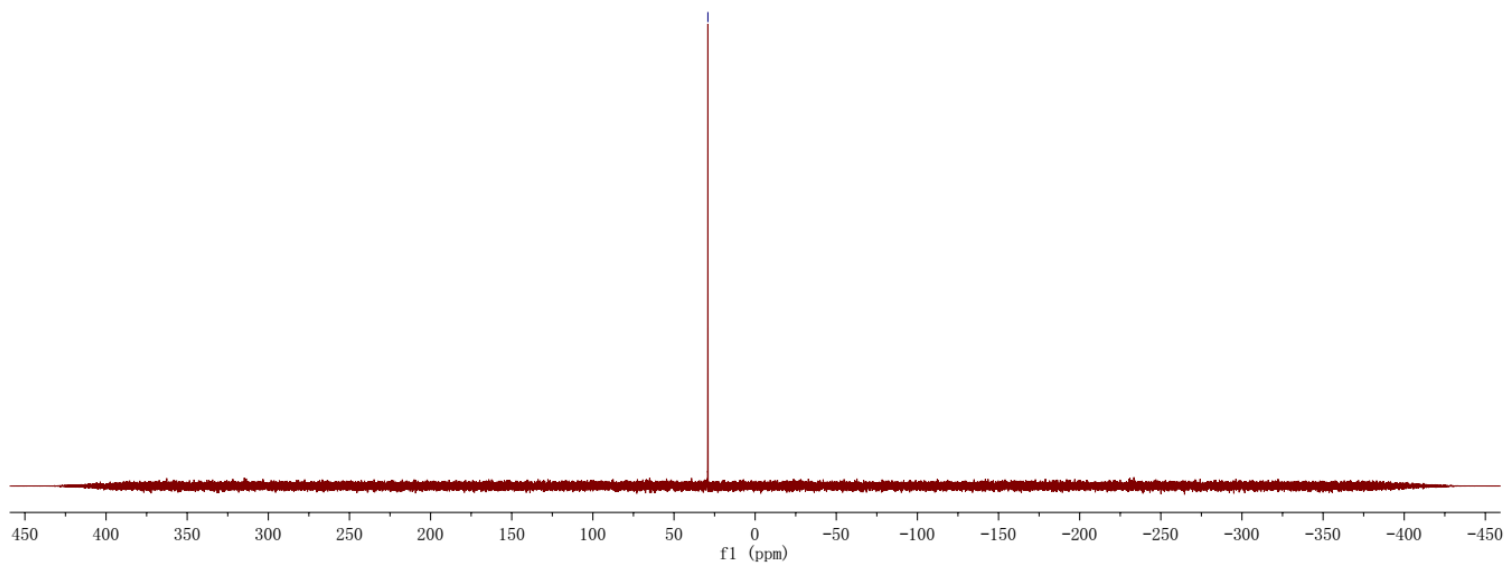



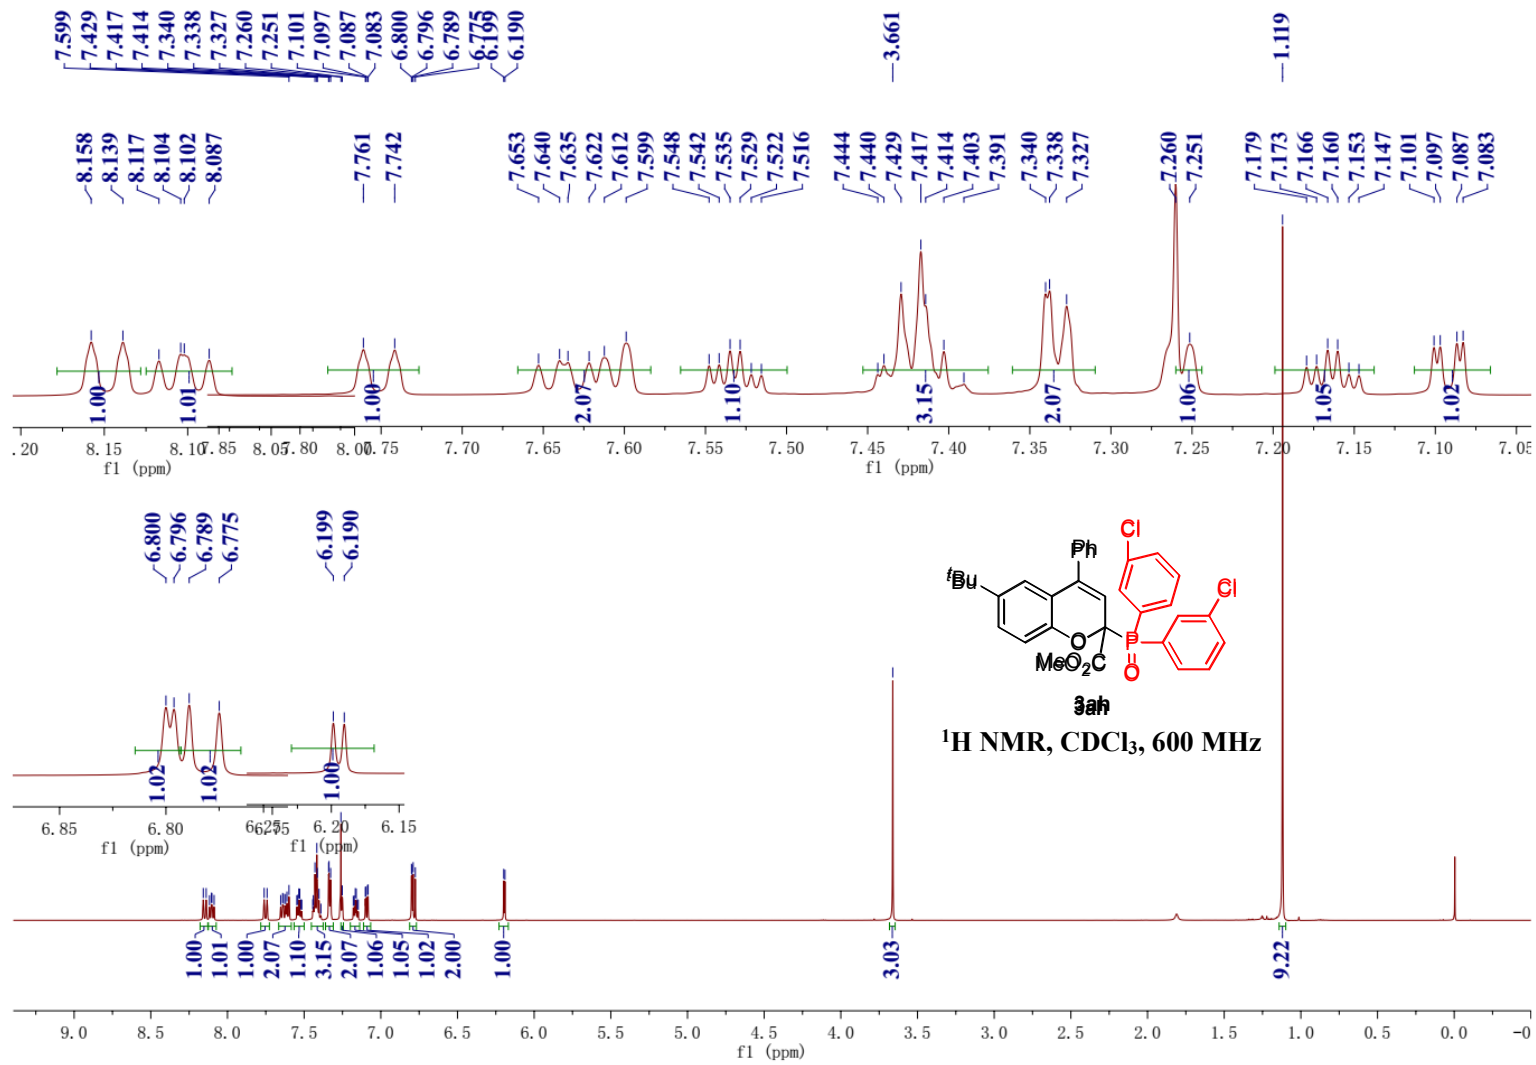

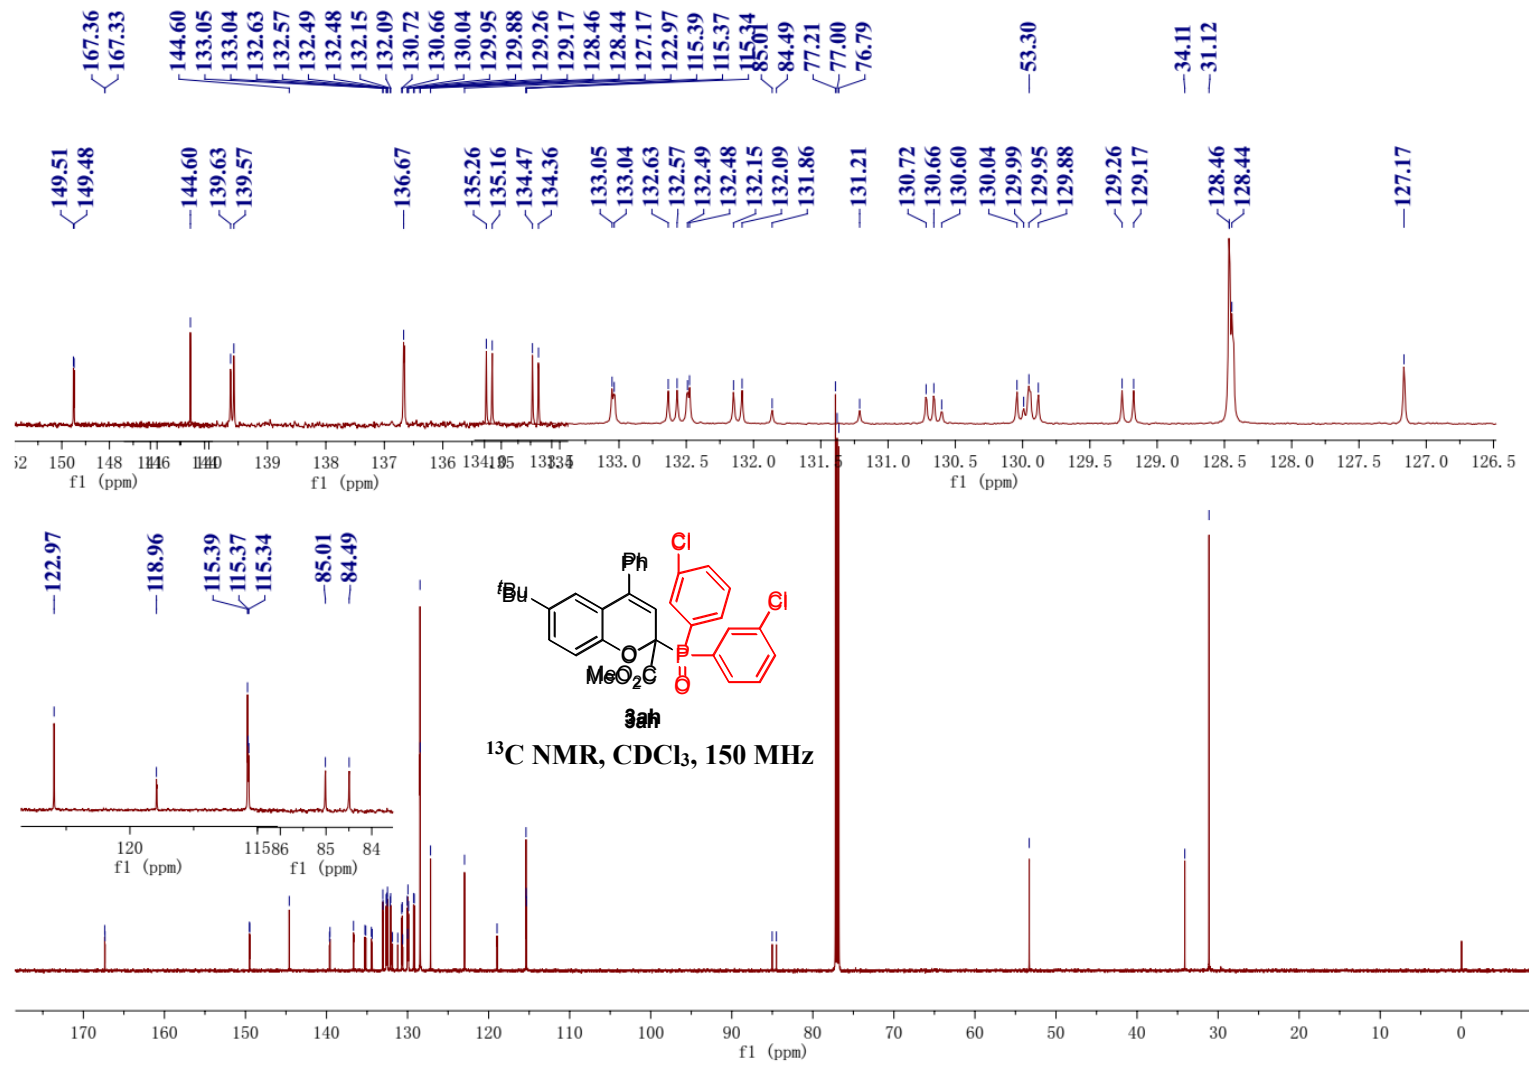

—25.05

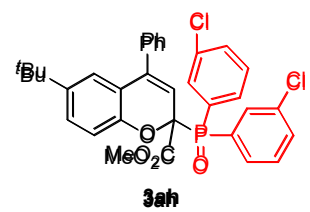

**3ah**  
<sup>31</sup>P NMR, CDCl<sub>3</sub>, 243 MHz

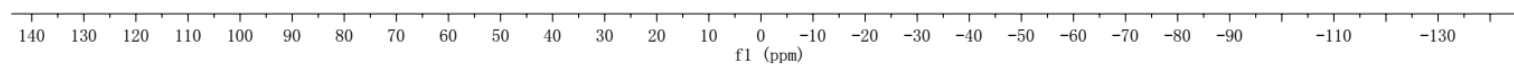

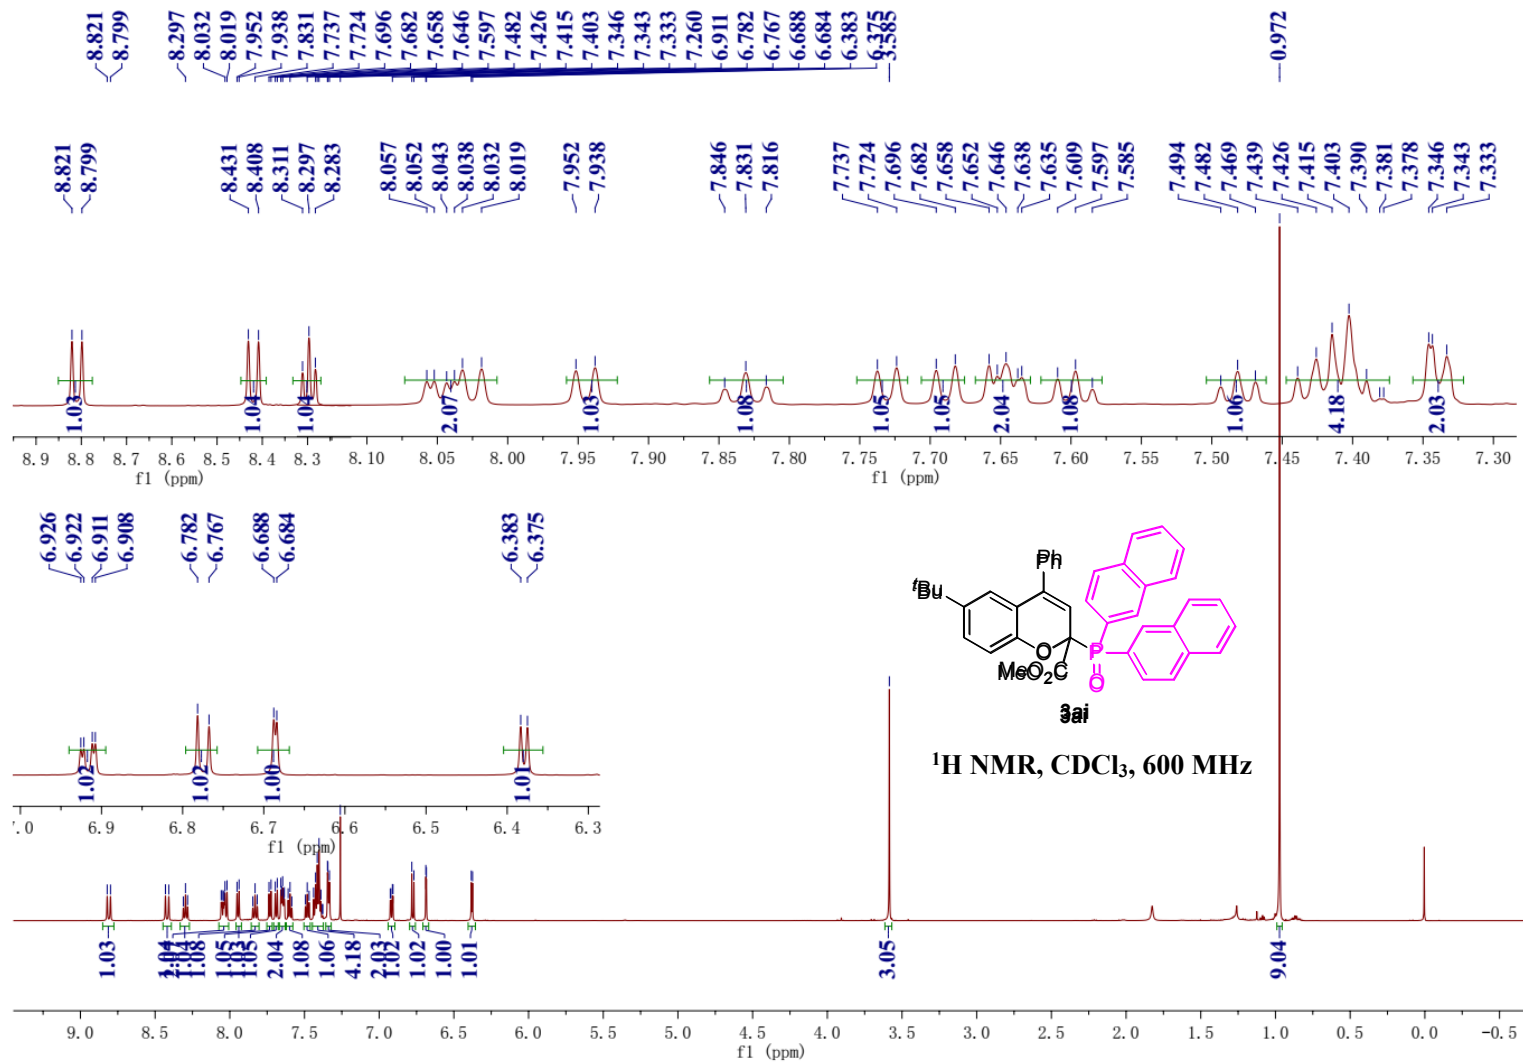

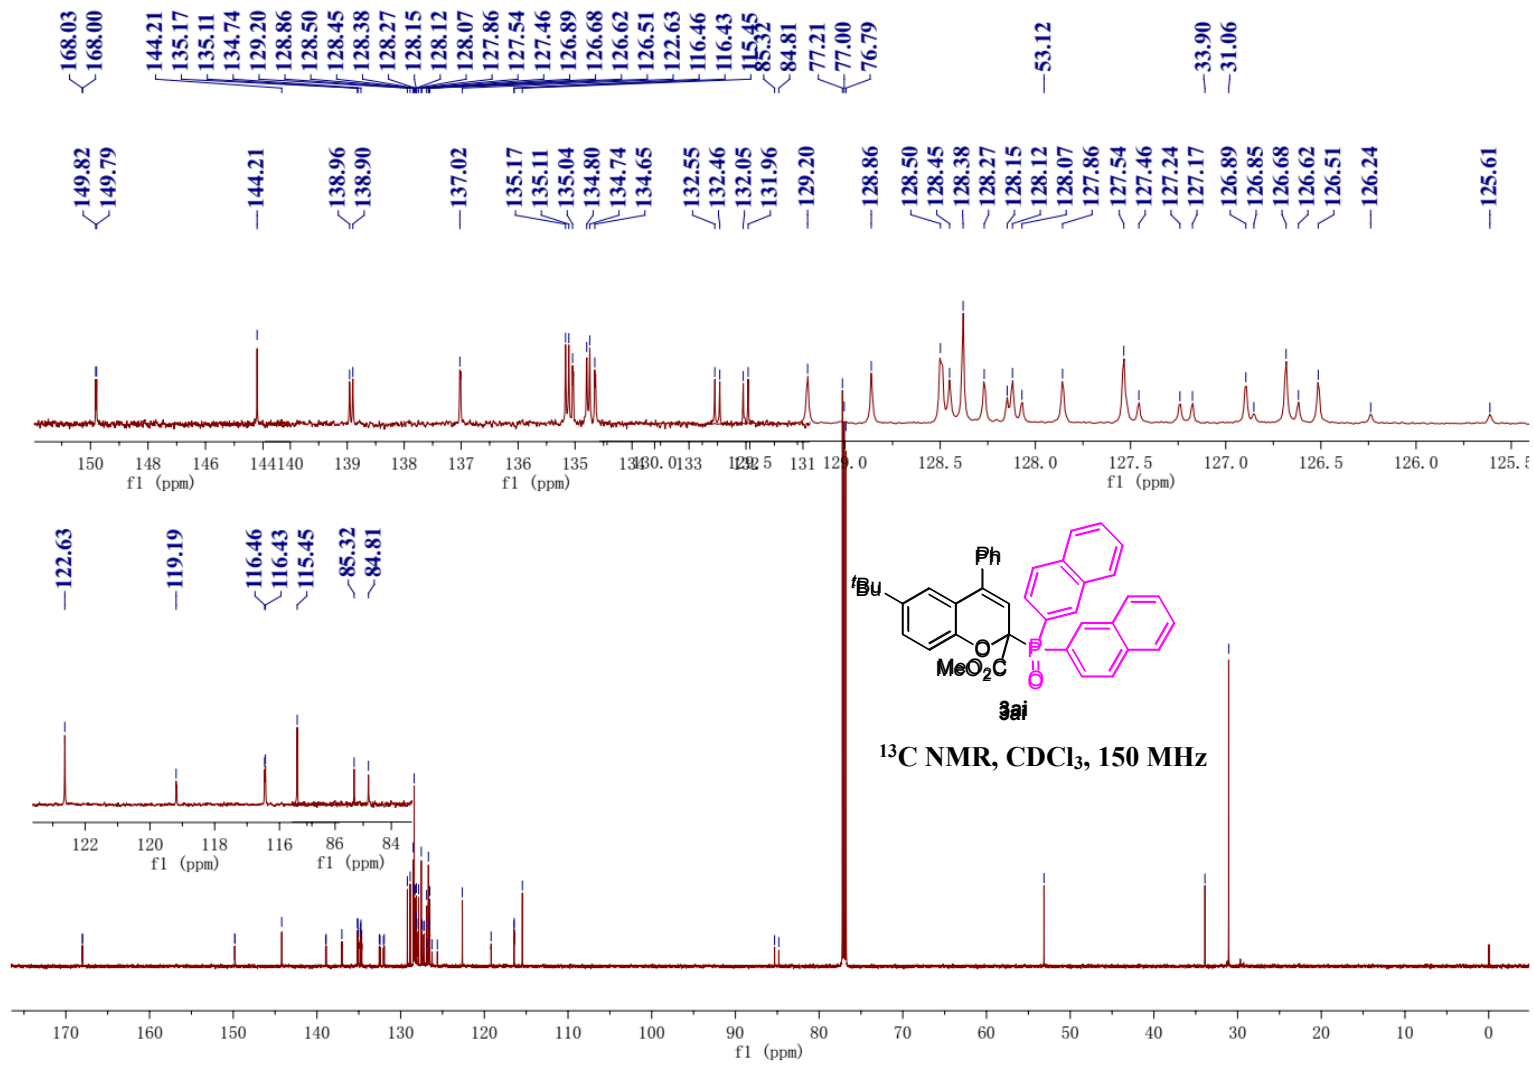

-28.36

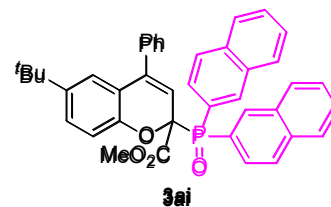

<sup>31</sup>P NMR, CDCl<sub>3</sub>, 243 MHz

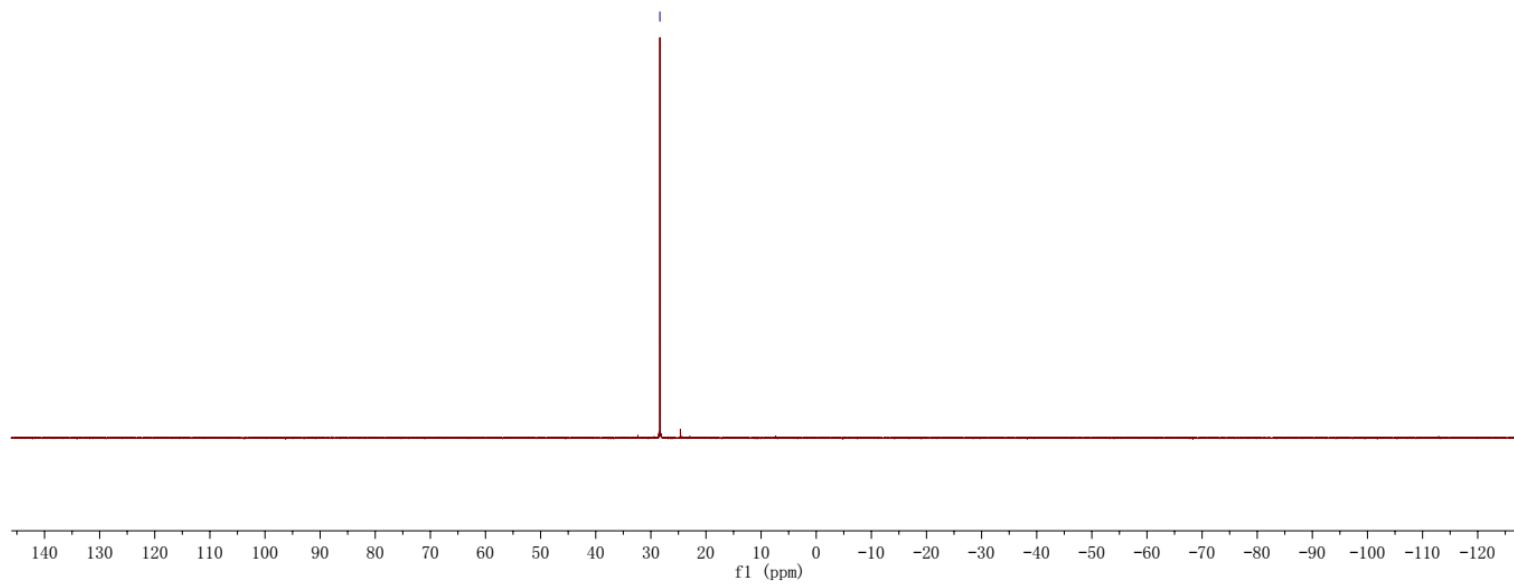

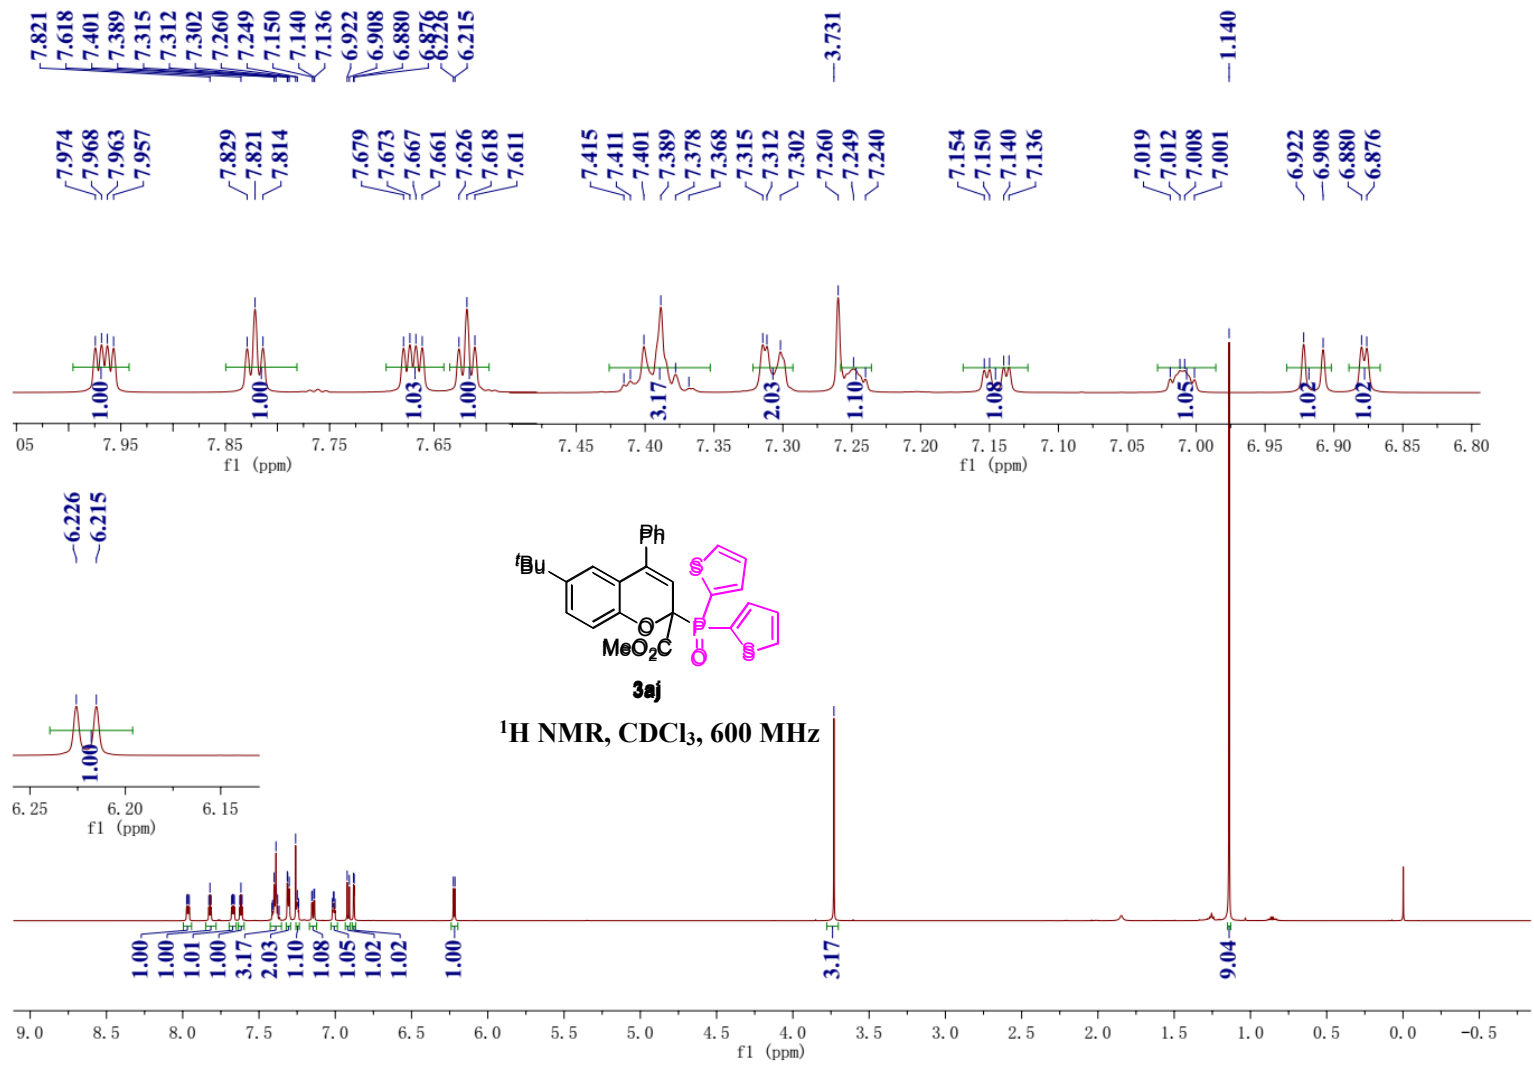

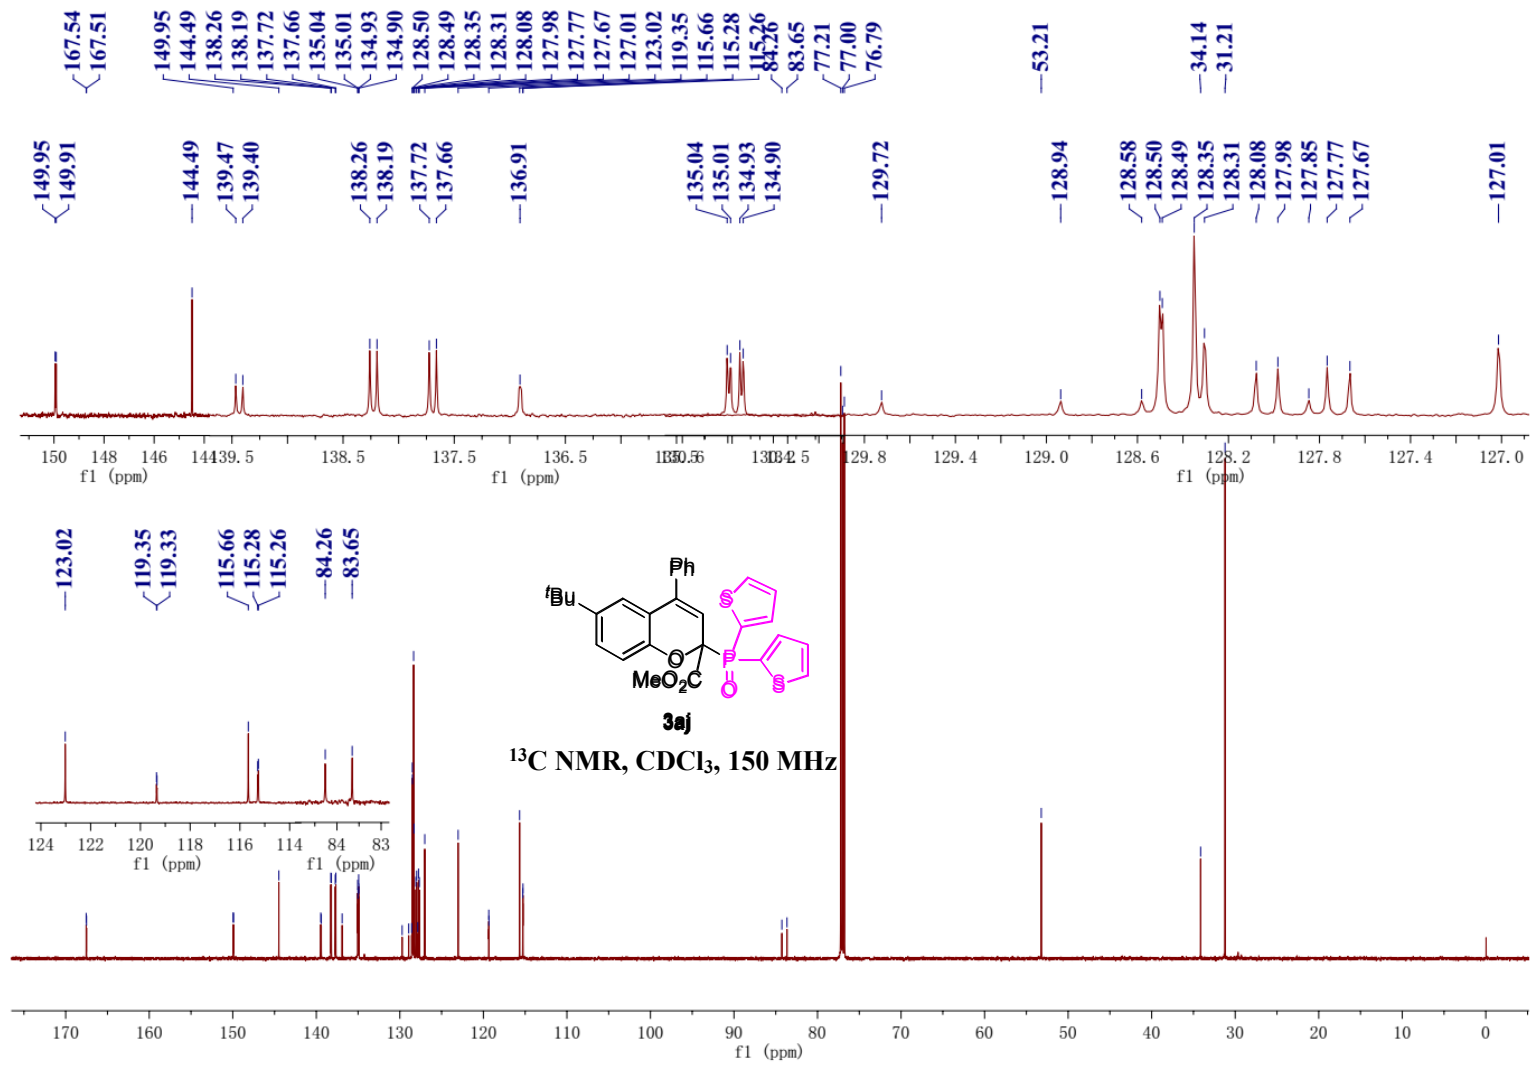



- 19.66

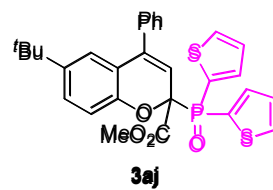

**3aj**  
<sup>31</sup>P NMR, CDCl<sub>3</sub>, 243 MHz

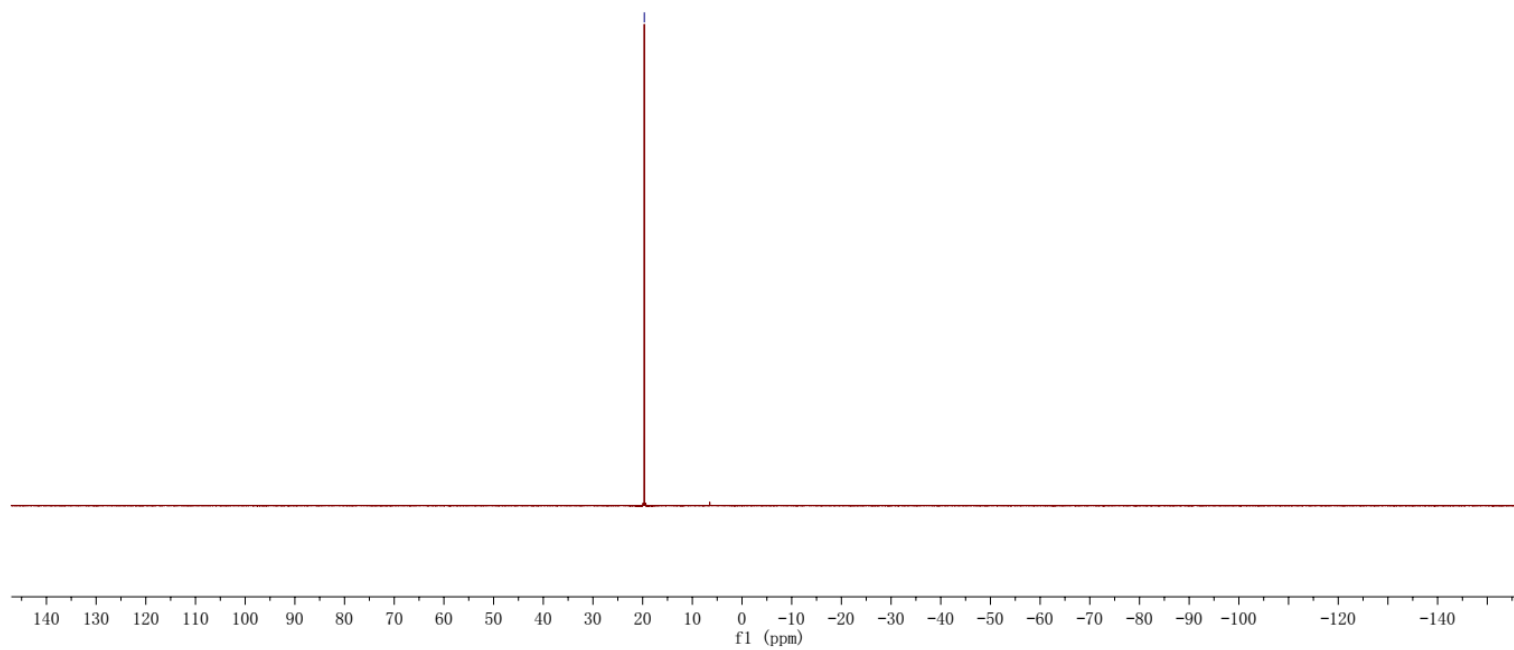

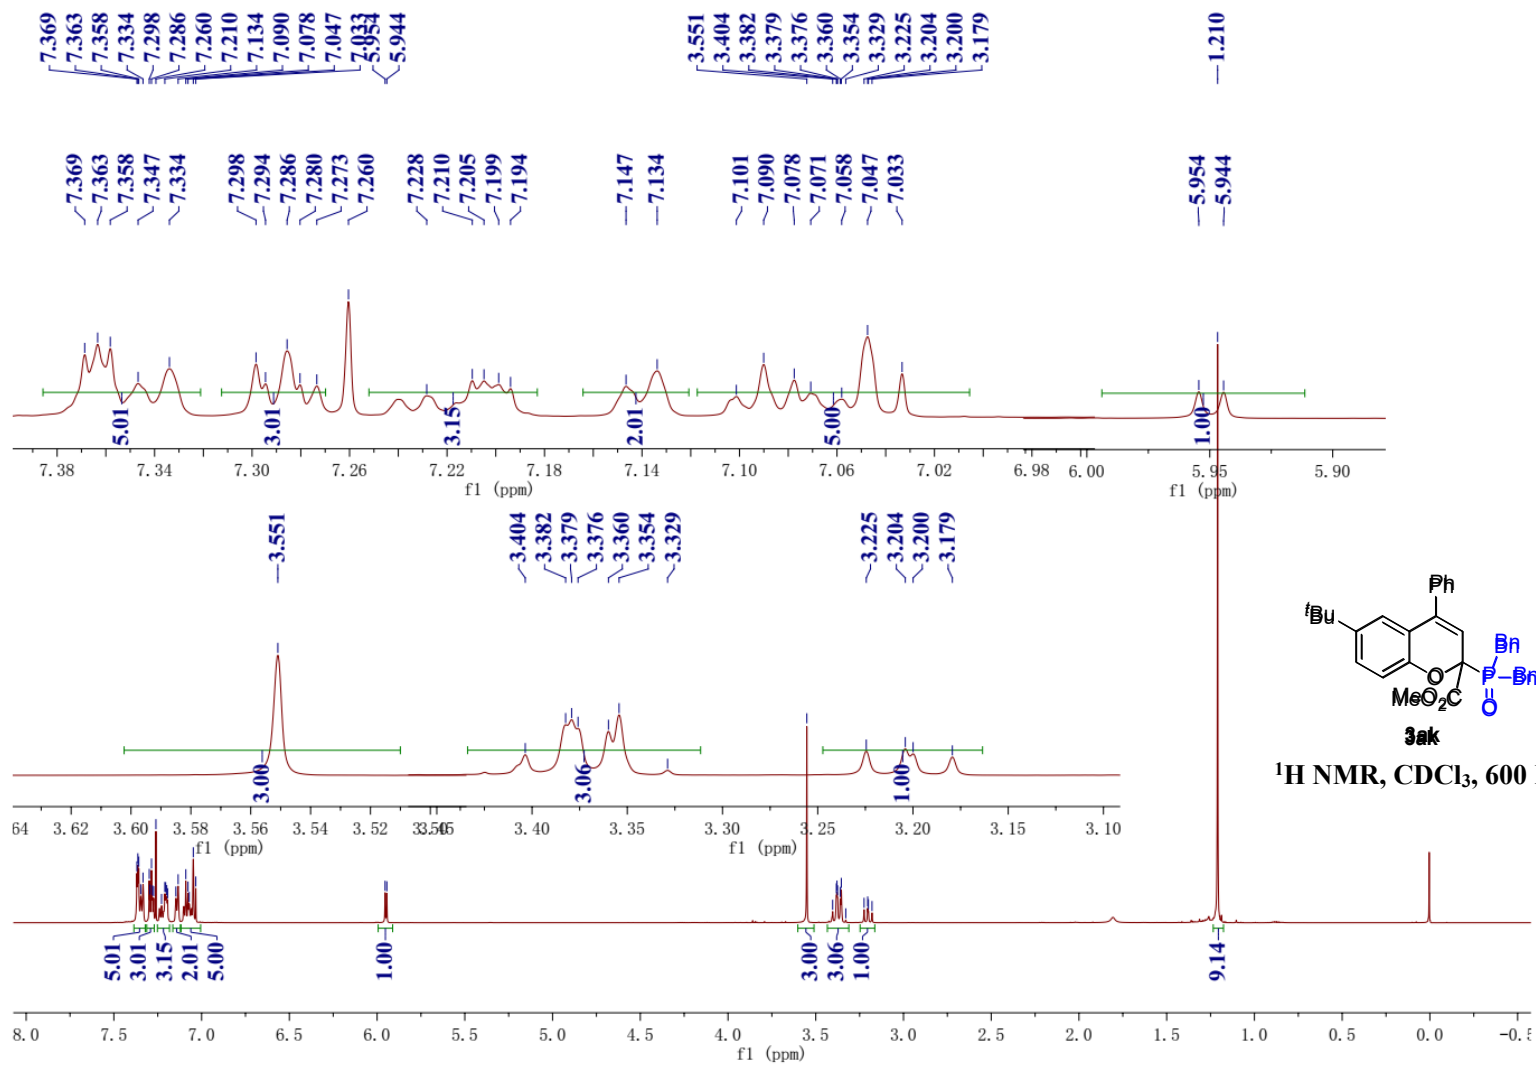

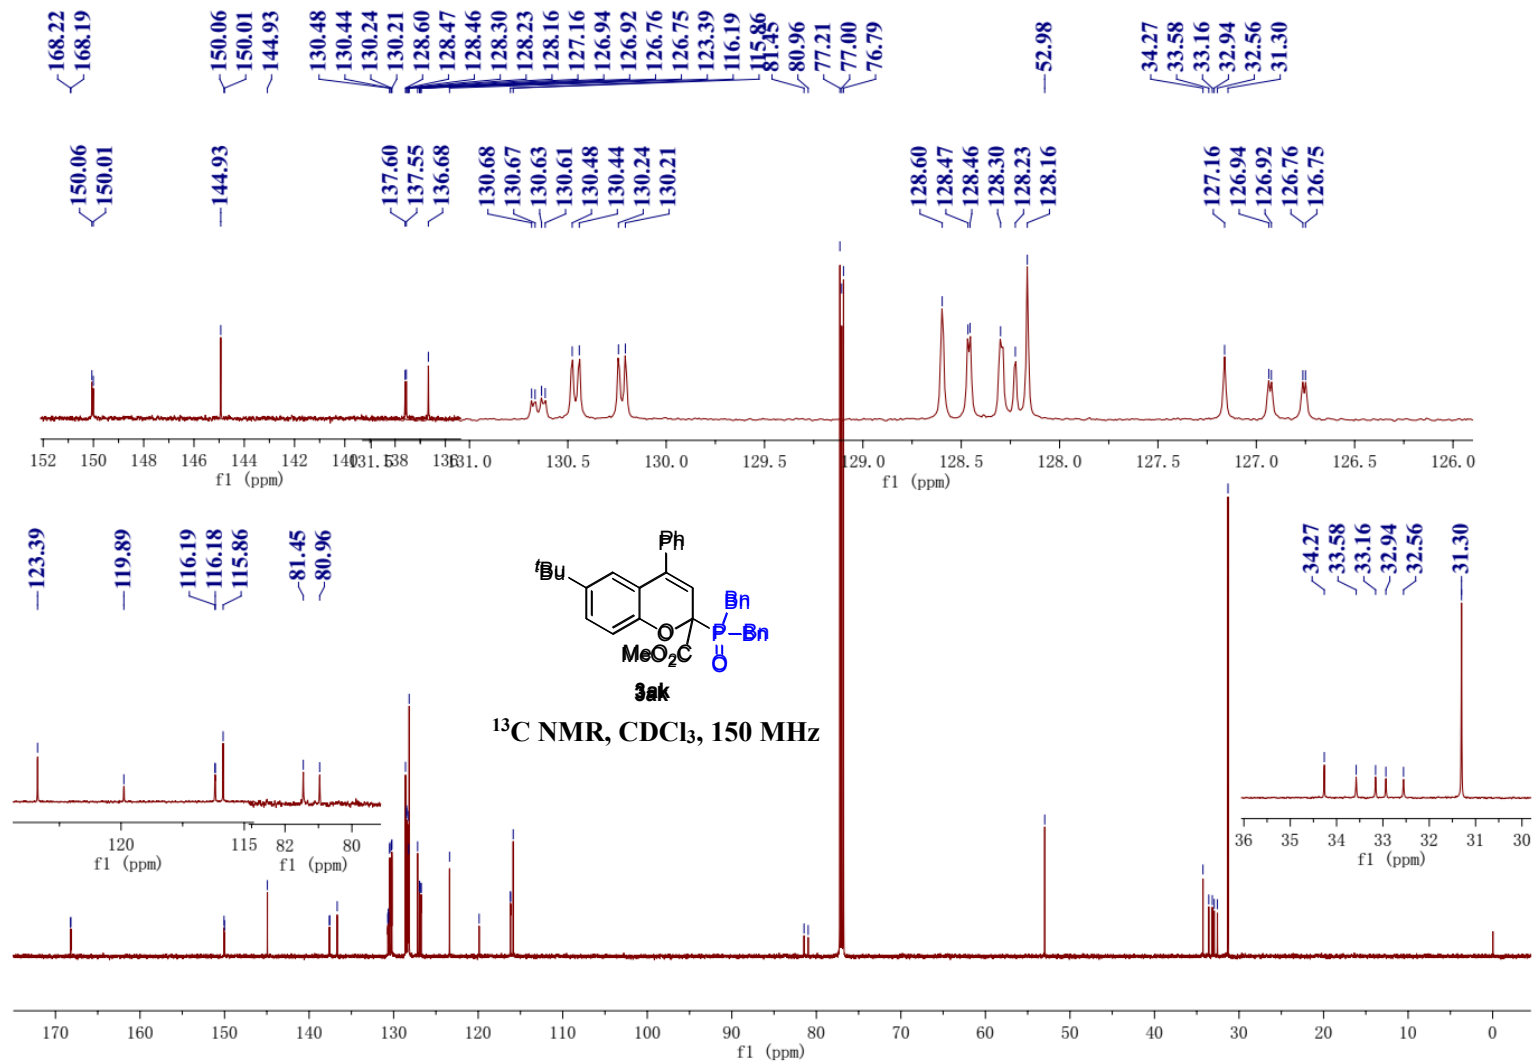

—42.75

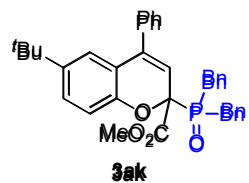

<sup>31</sup>P NMR, CDCl<sub>3</sub>, 243 MHz

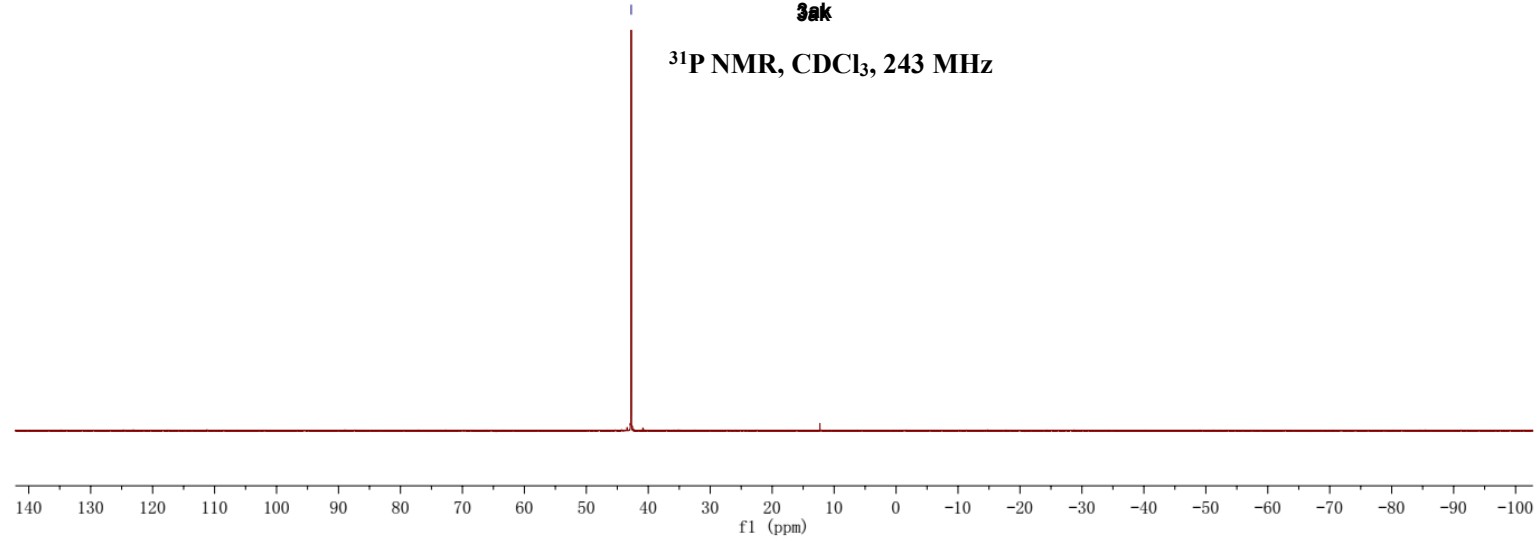

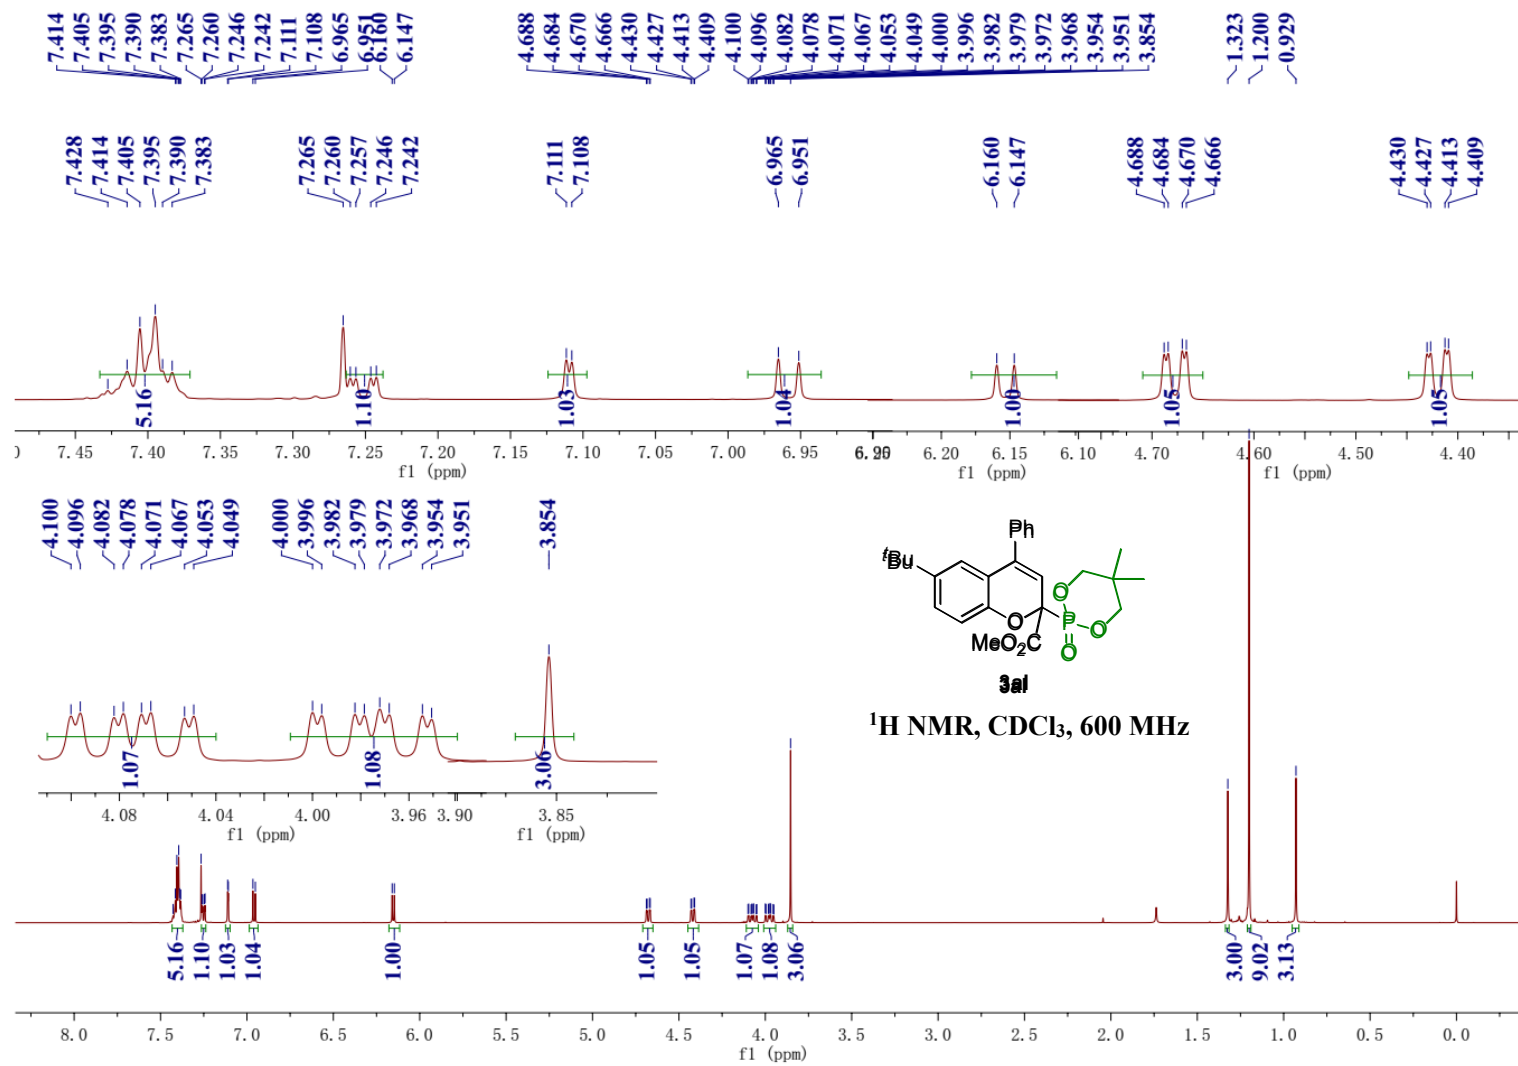

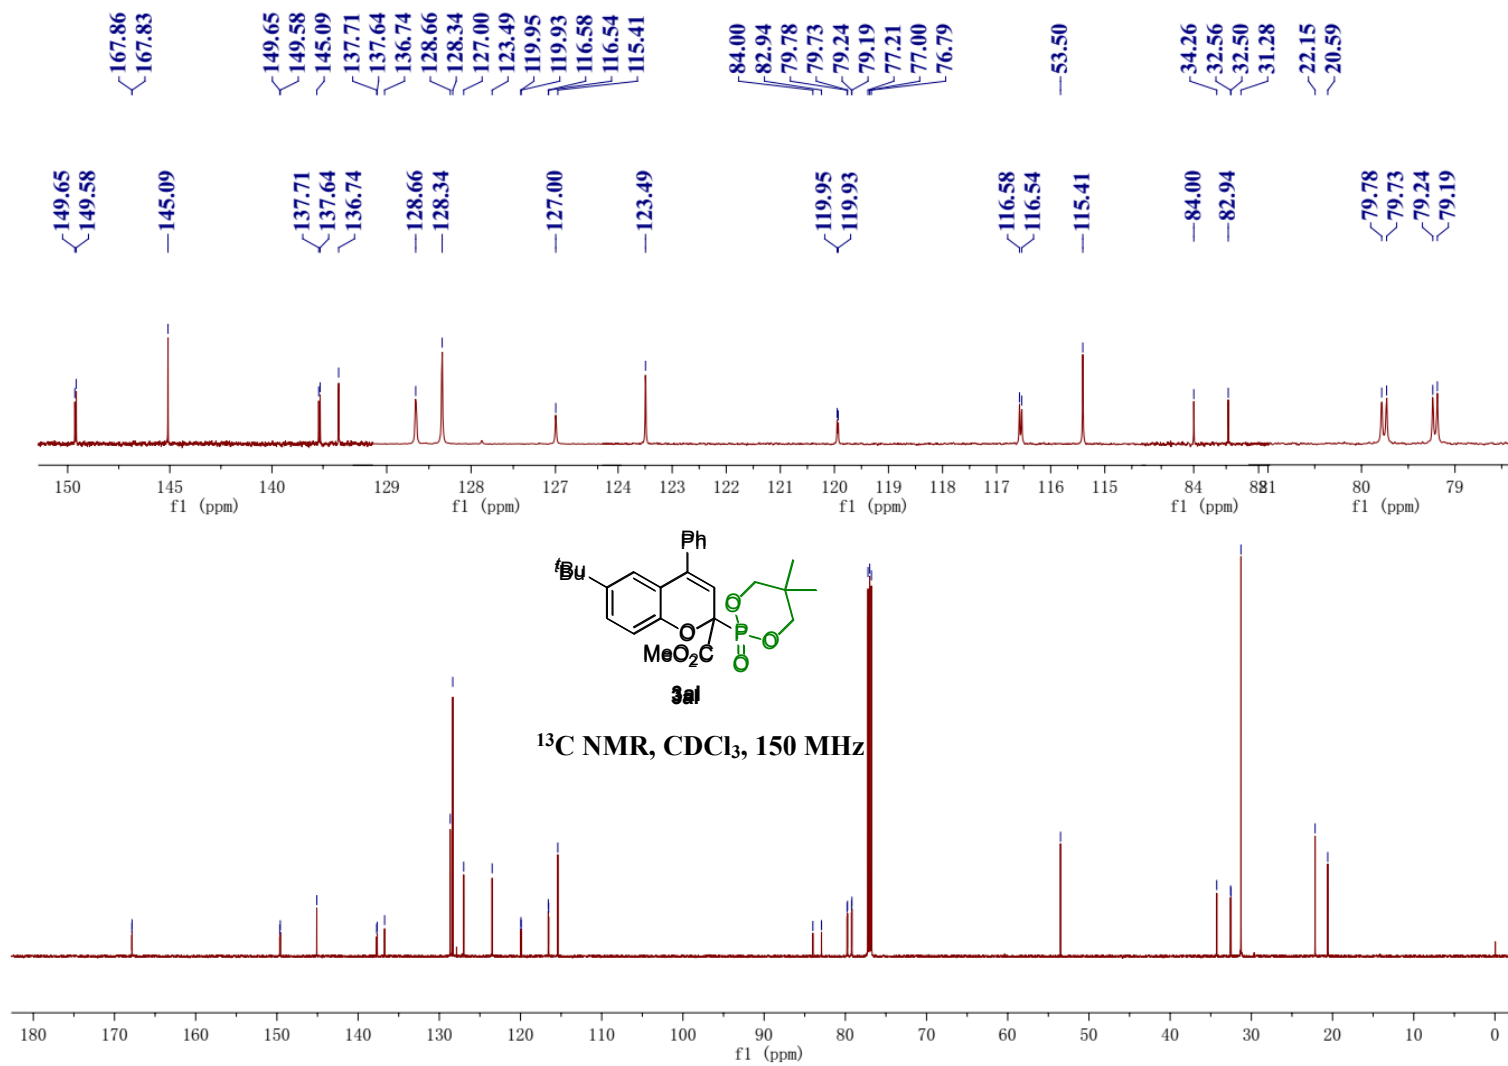

-3.41

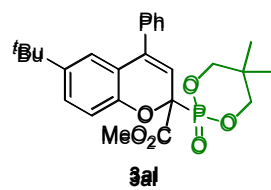

<sup>31</sup>P NMR, CDCl<sub>3</sub>, 243 MHz

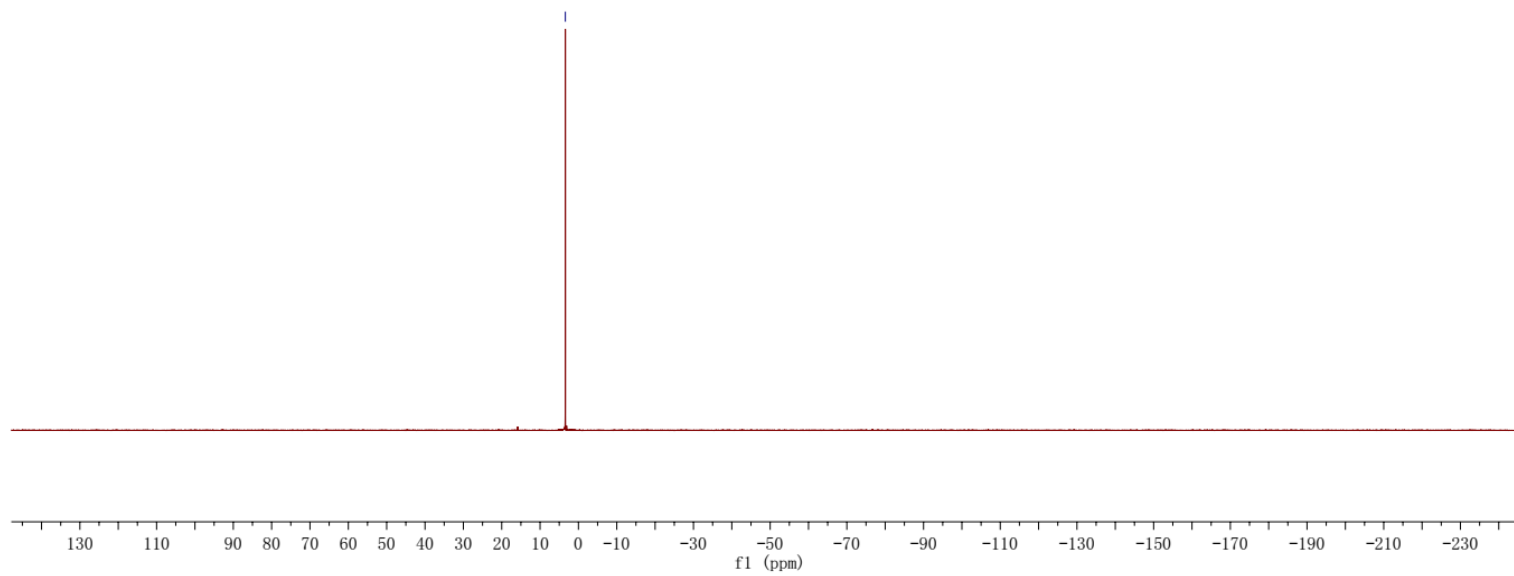

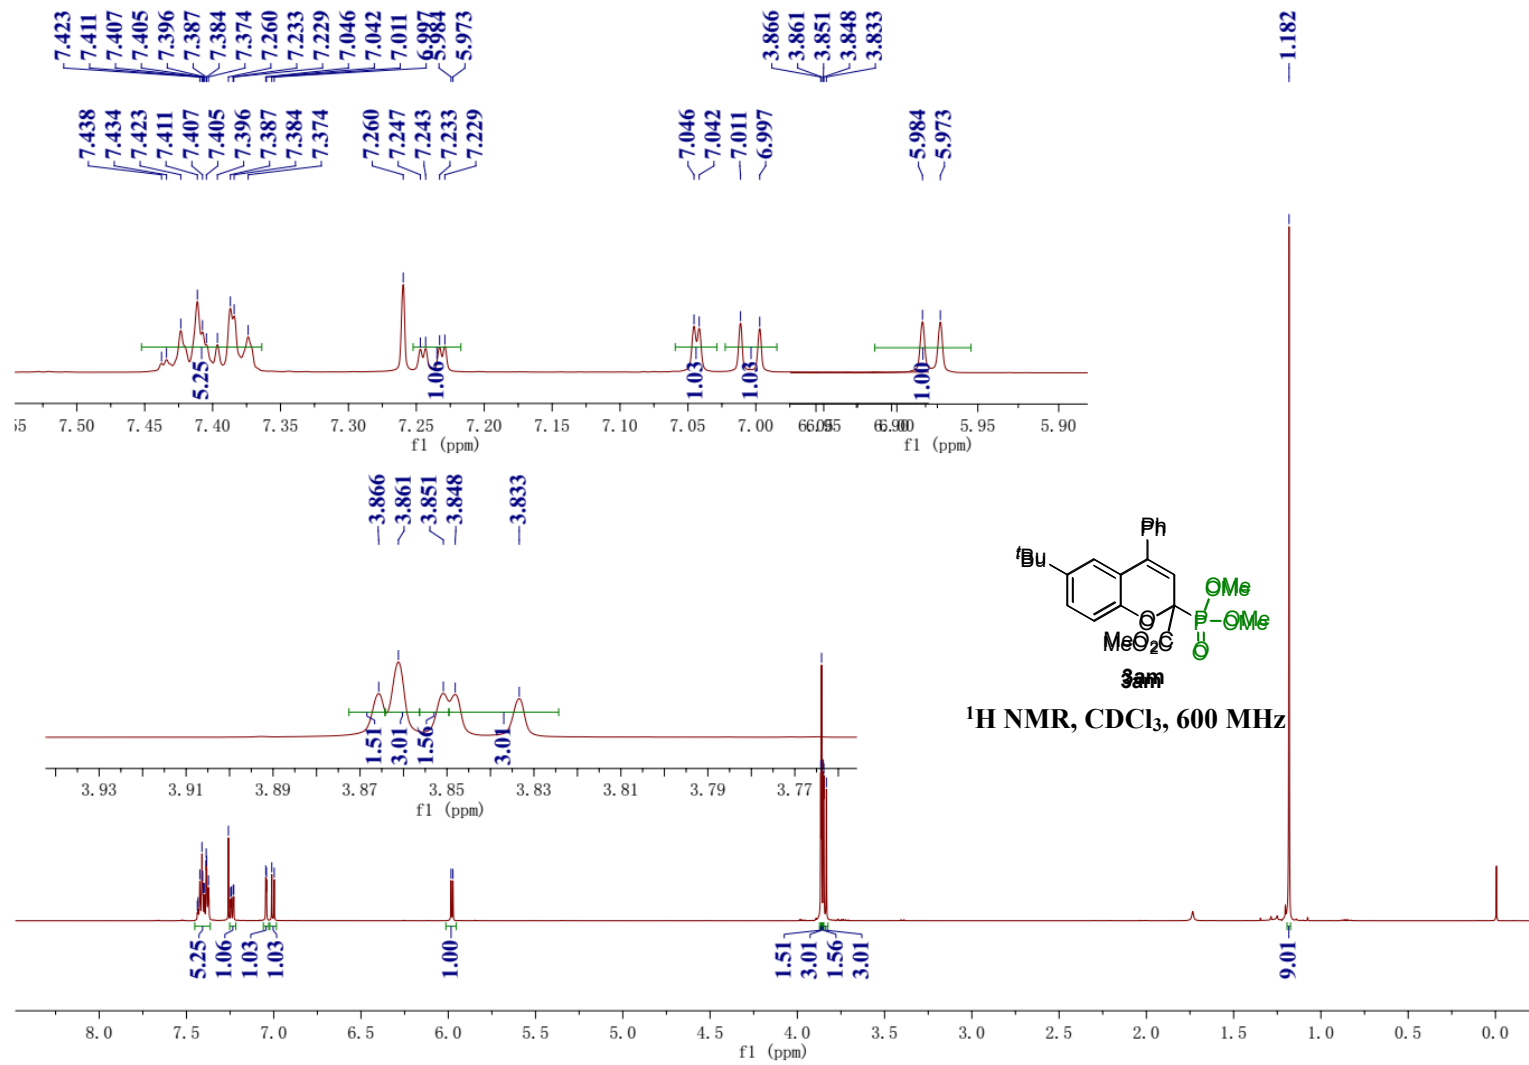



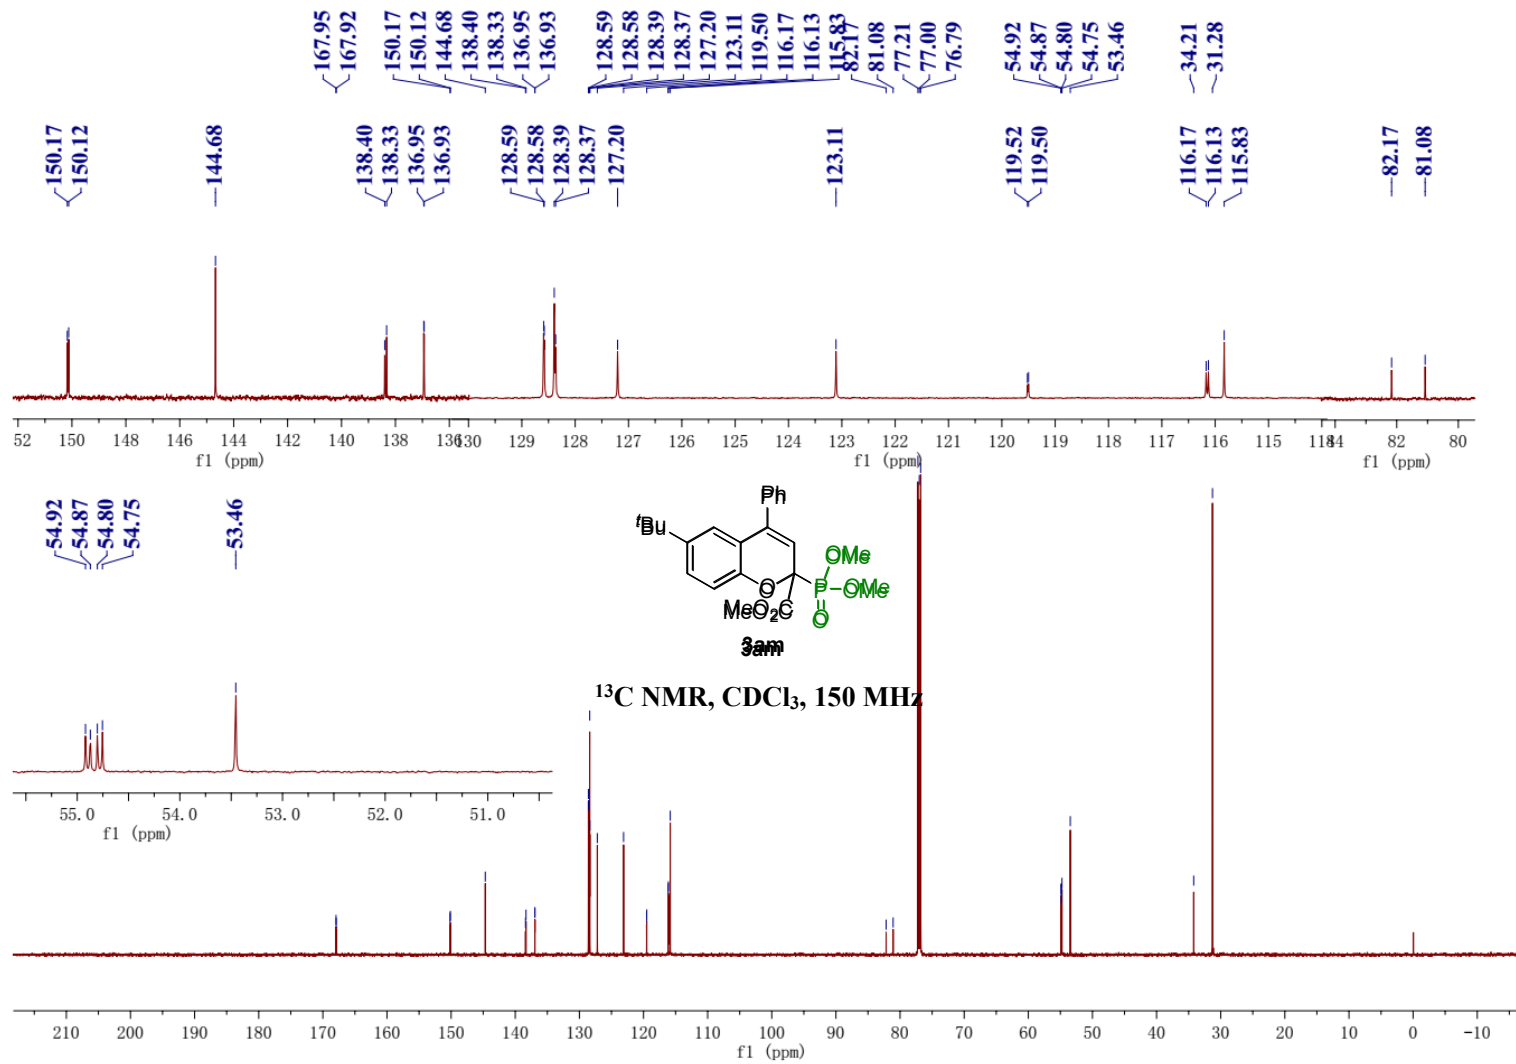

-14.79

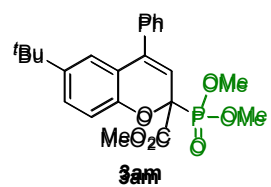

<sup>31</sup>P NMR, CDCl<sub>3</sub>, 243 MHz

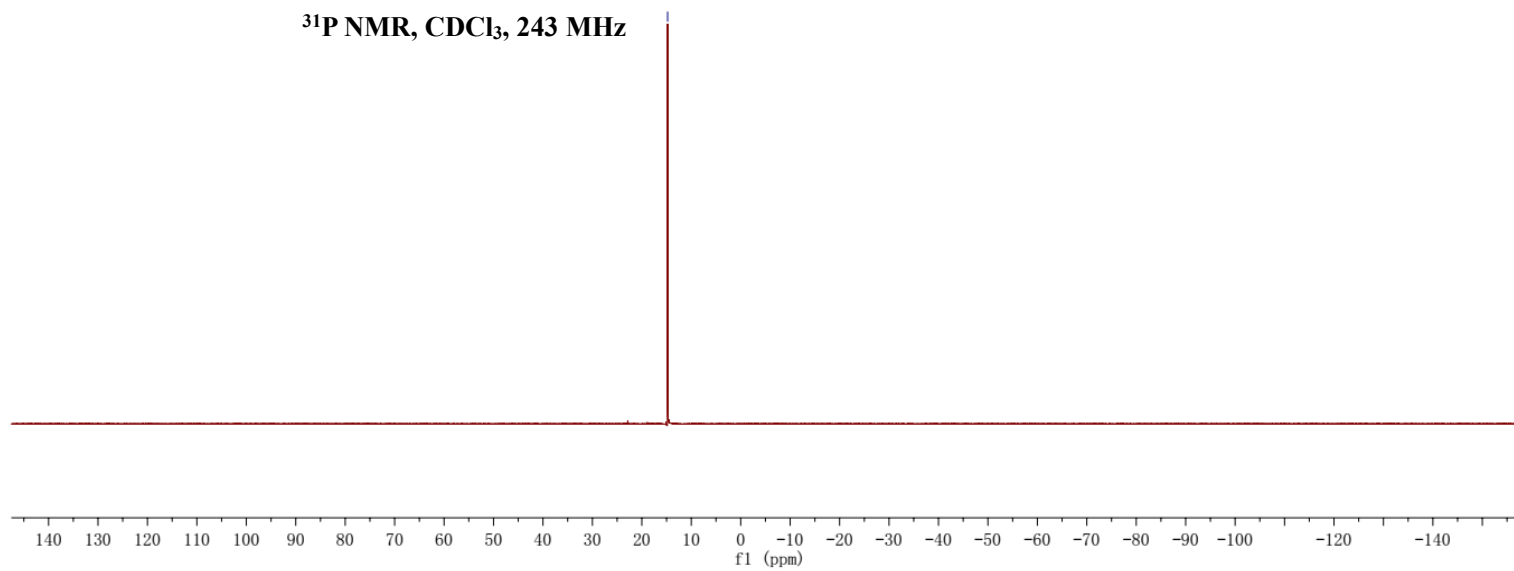

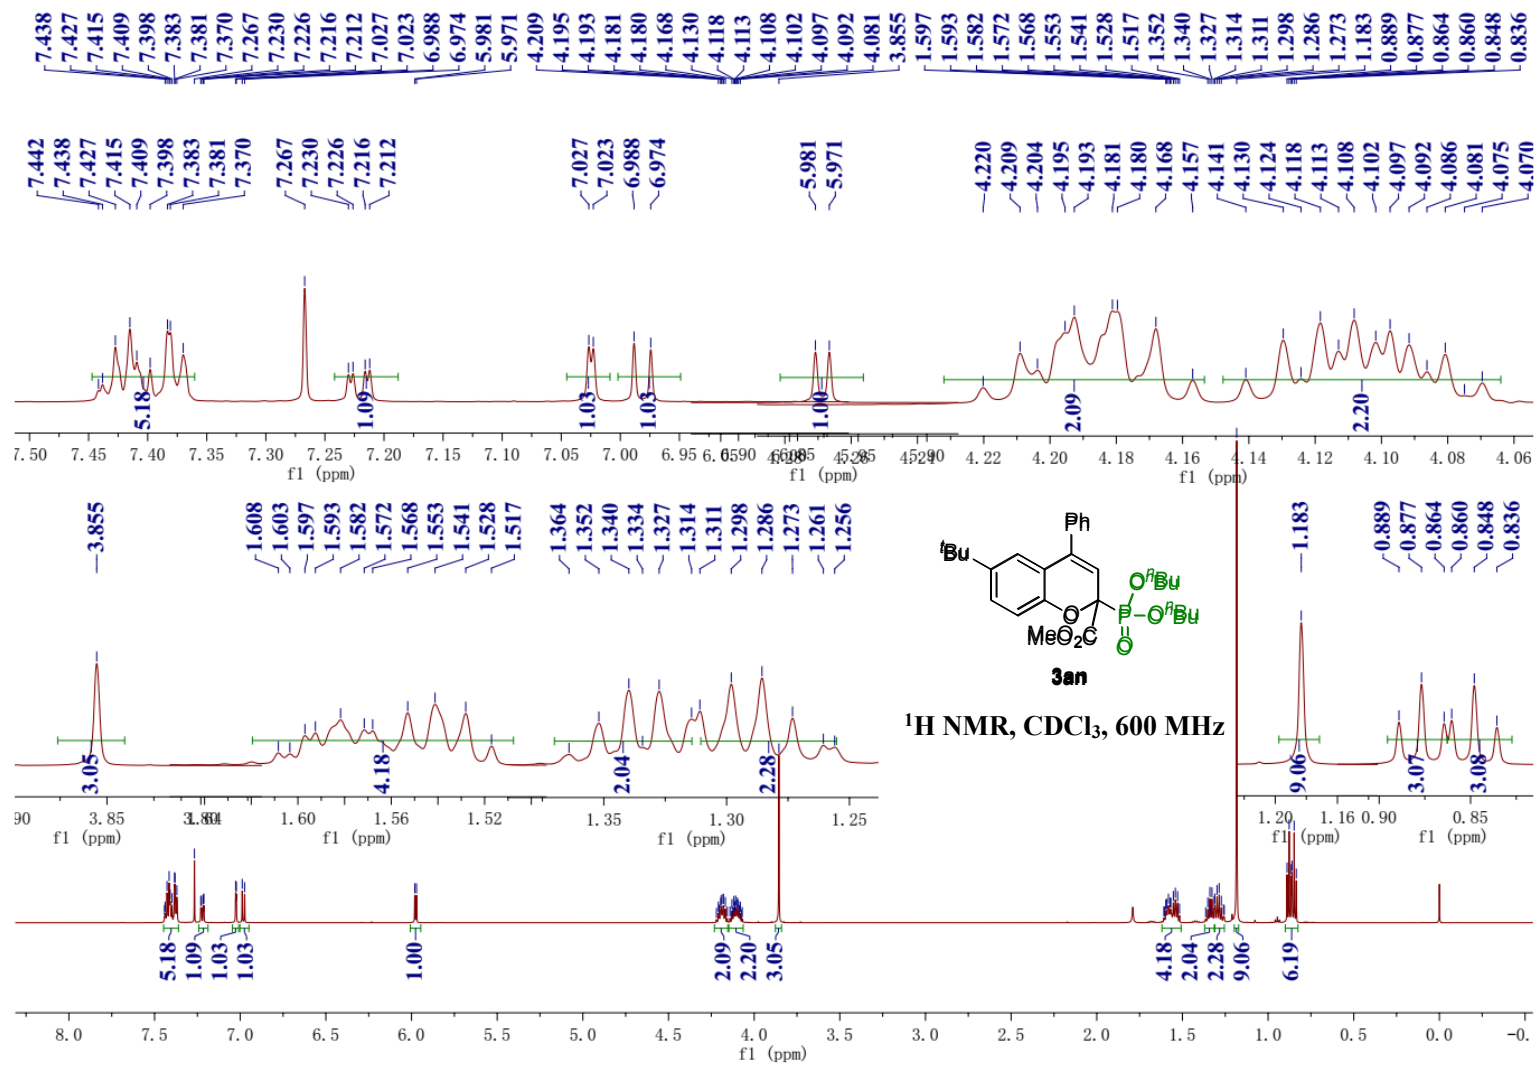

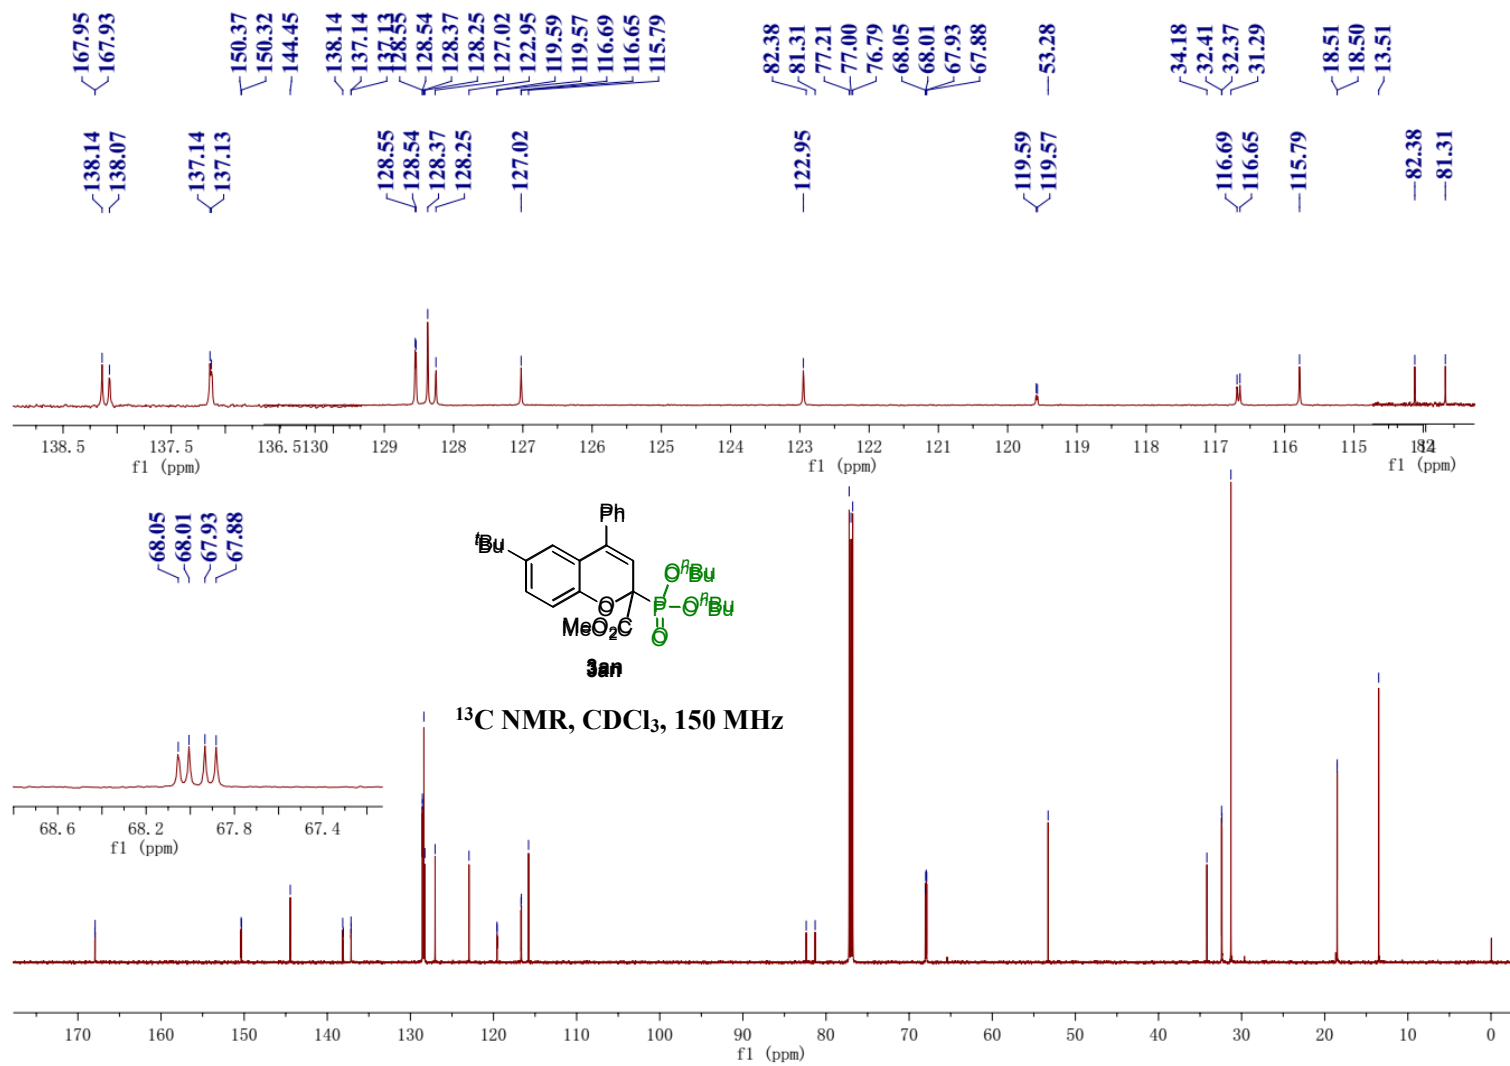

-12.27

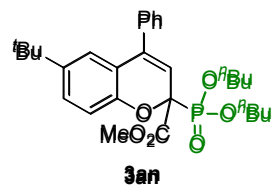

<sup>31</sup>P NMR, CDCl<sub>3</sub>, 243 MHz

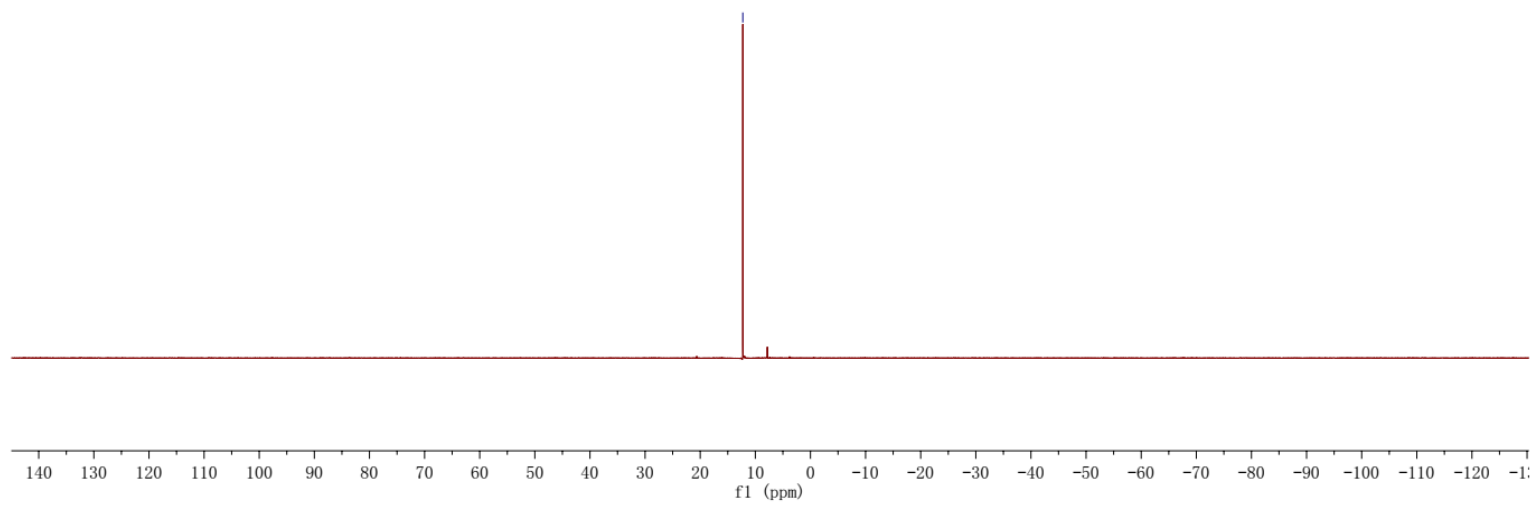

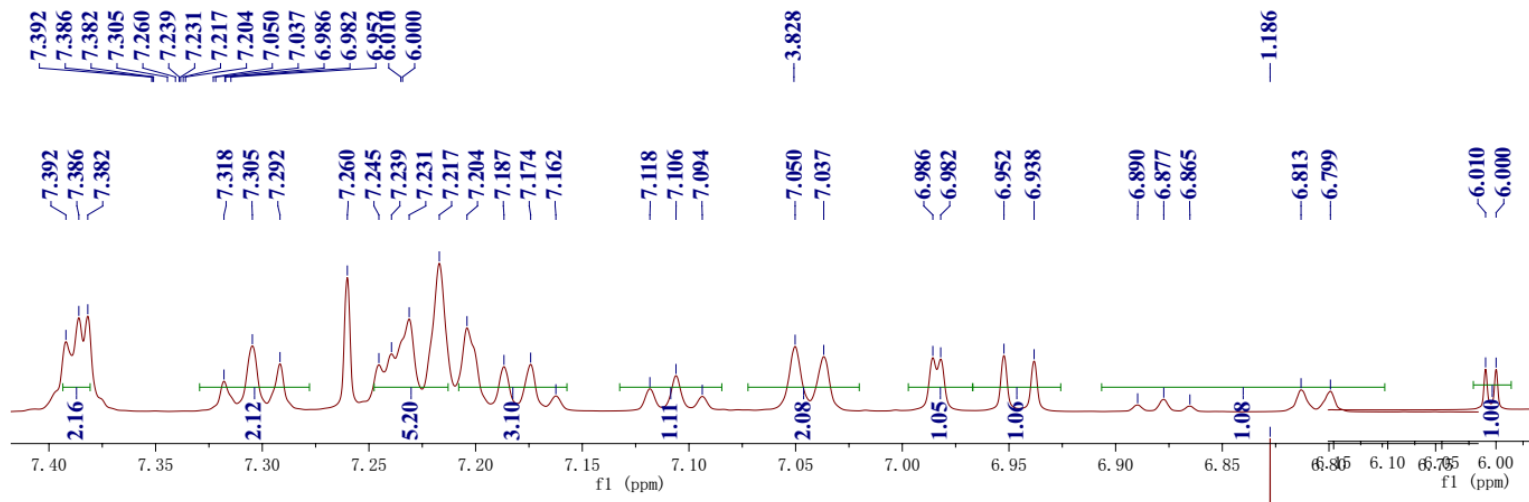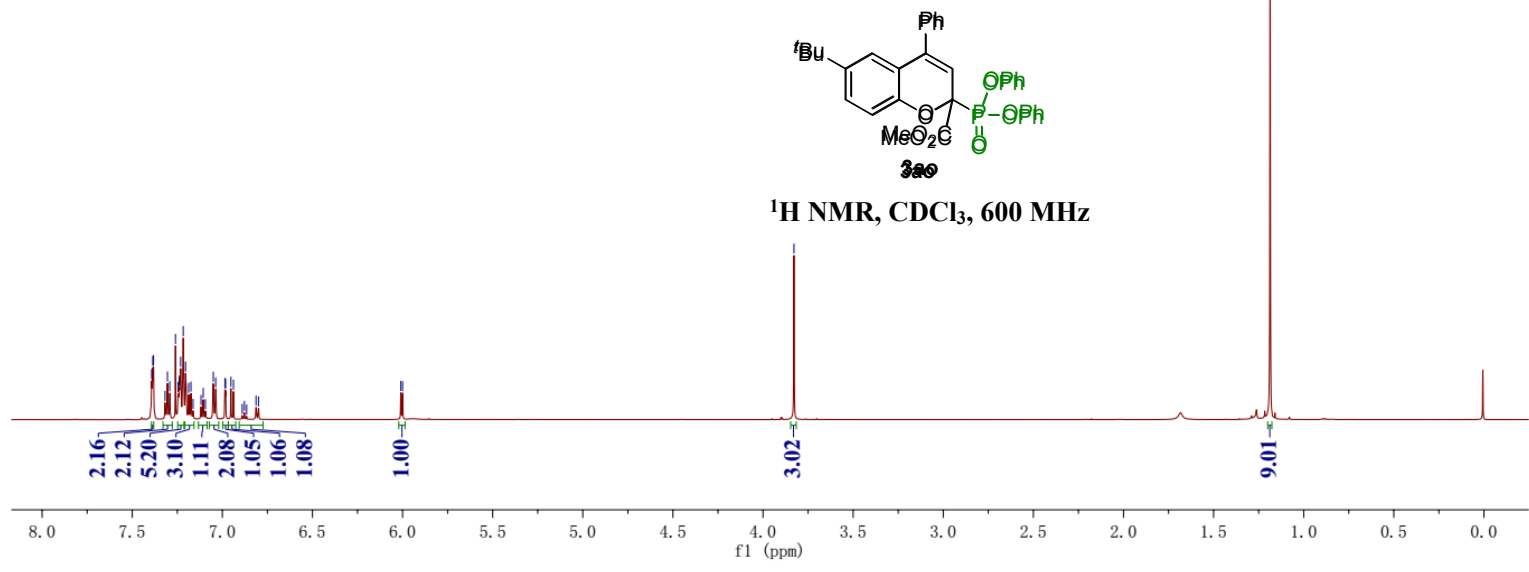

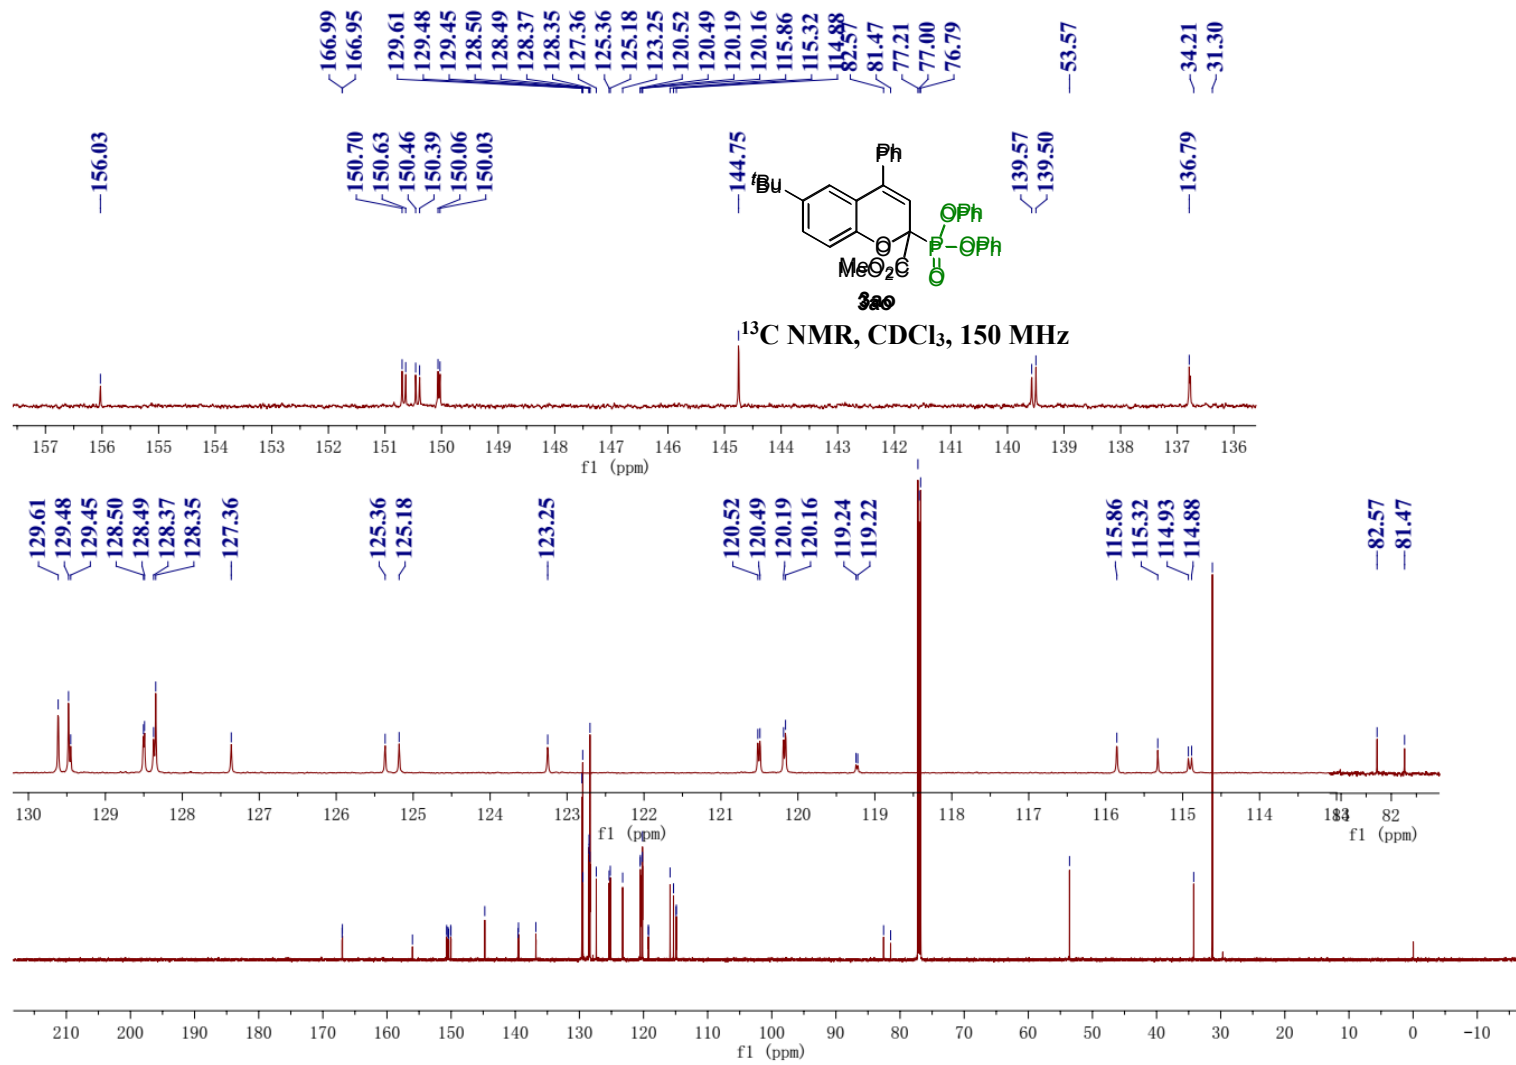

-3.83

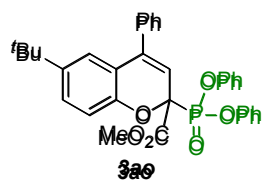

<sup>31</sup>P NMR, CDCl<sub>3</sub>, 243 MHz

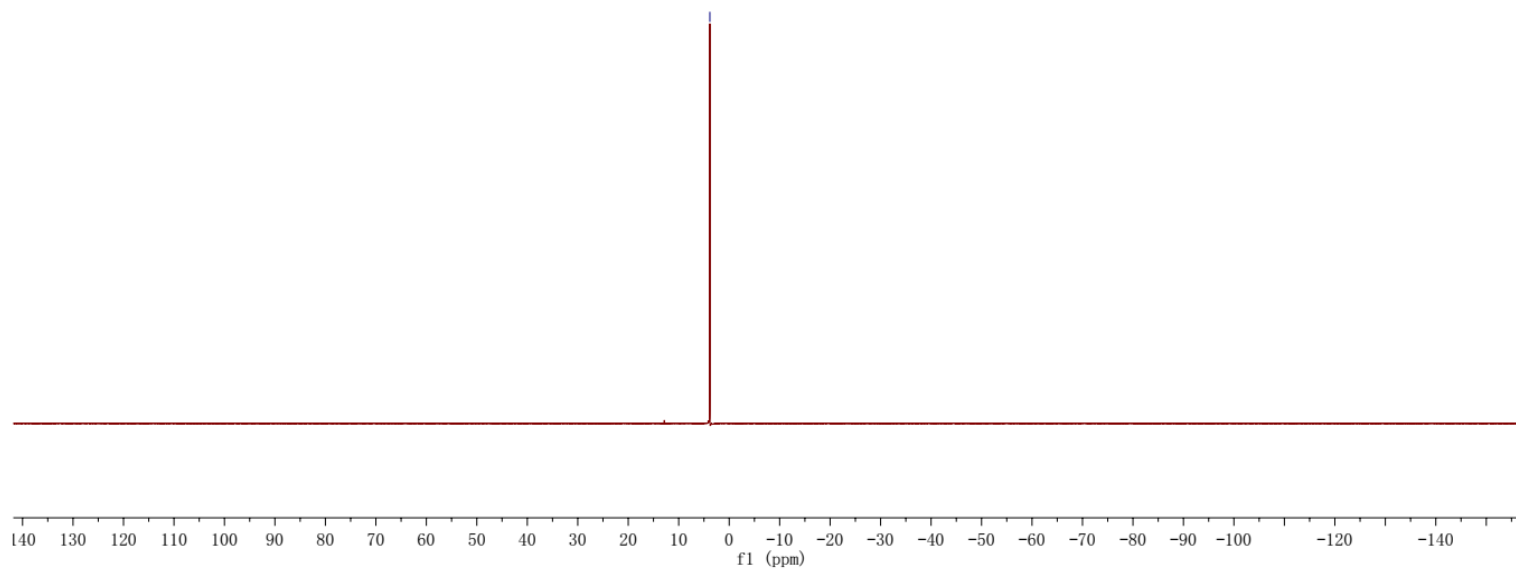



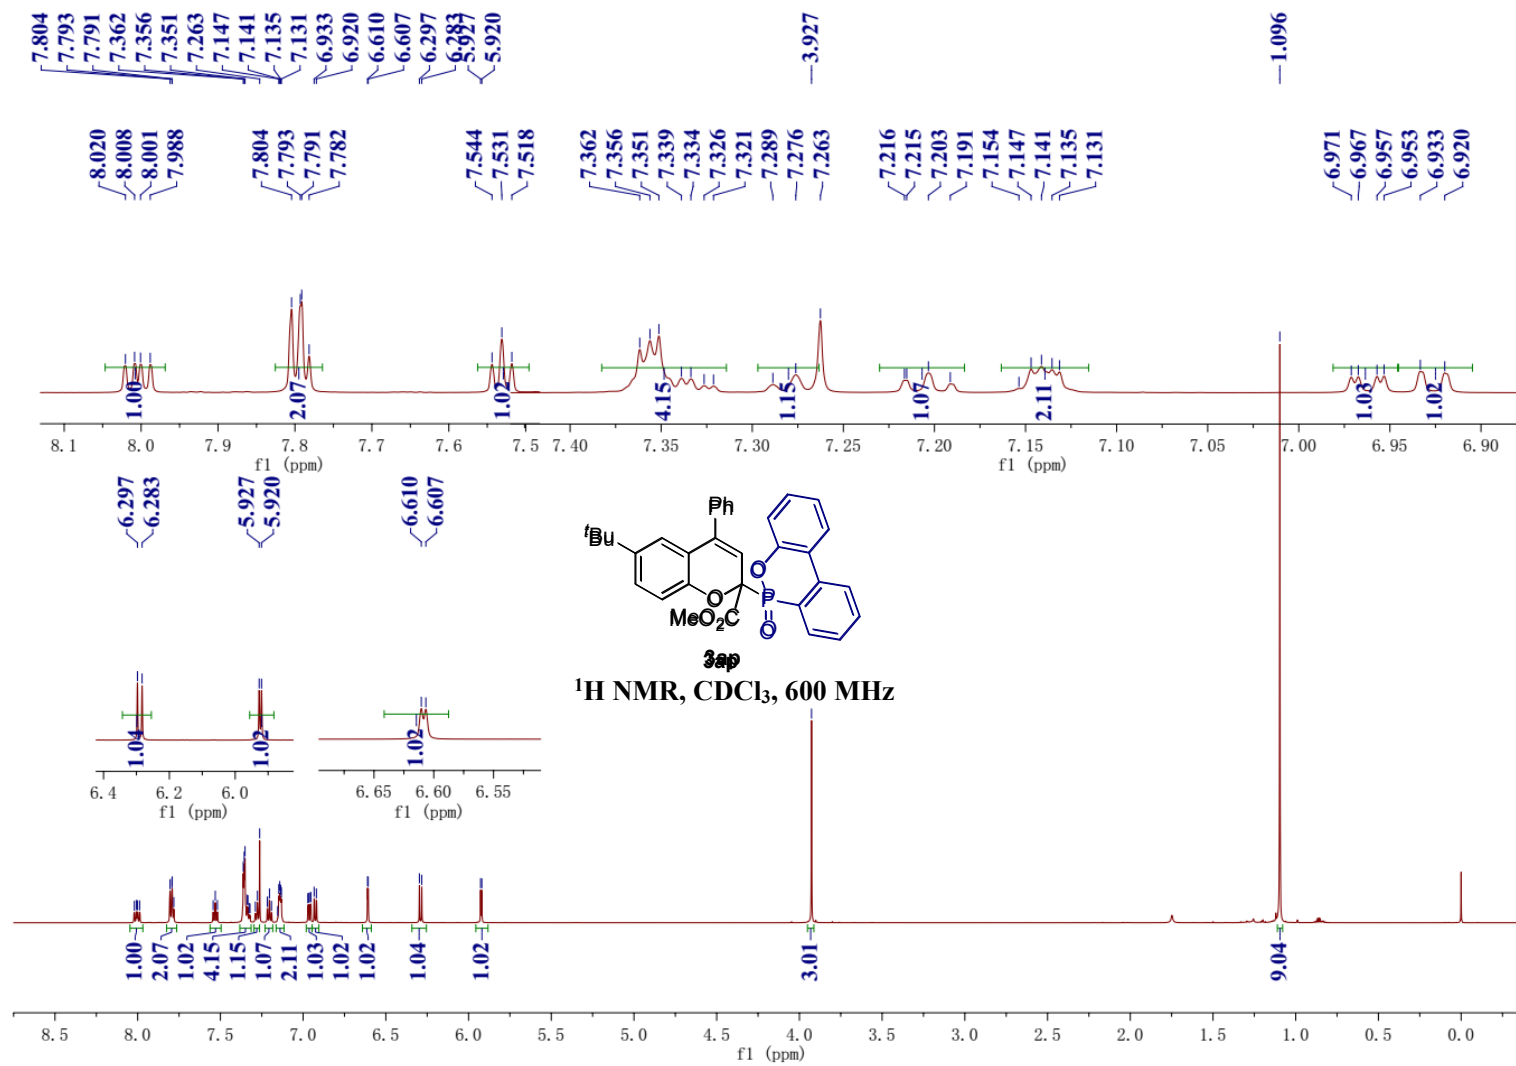

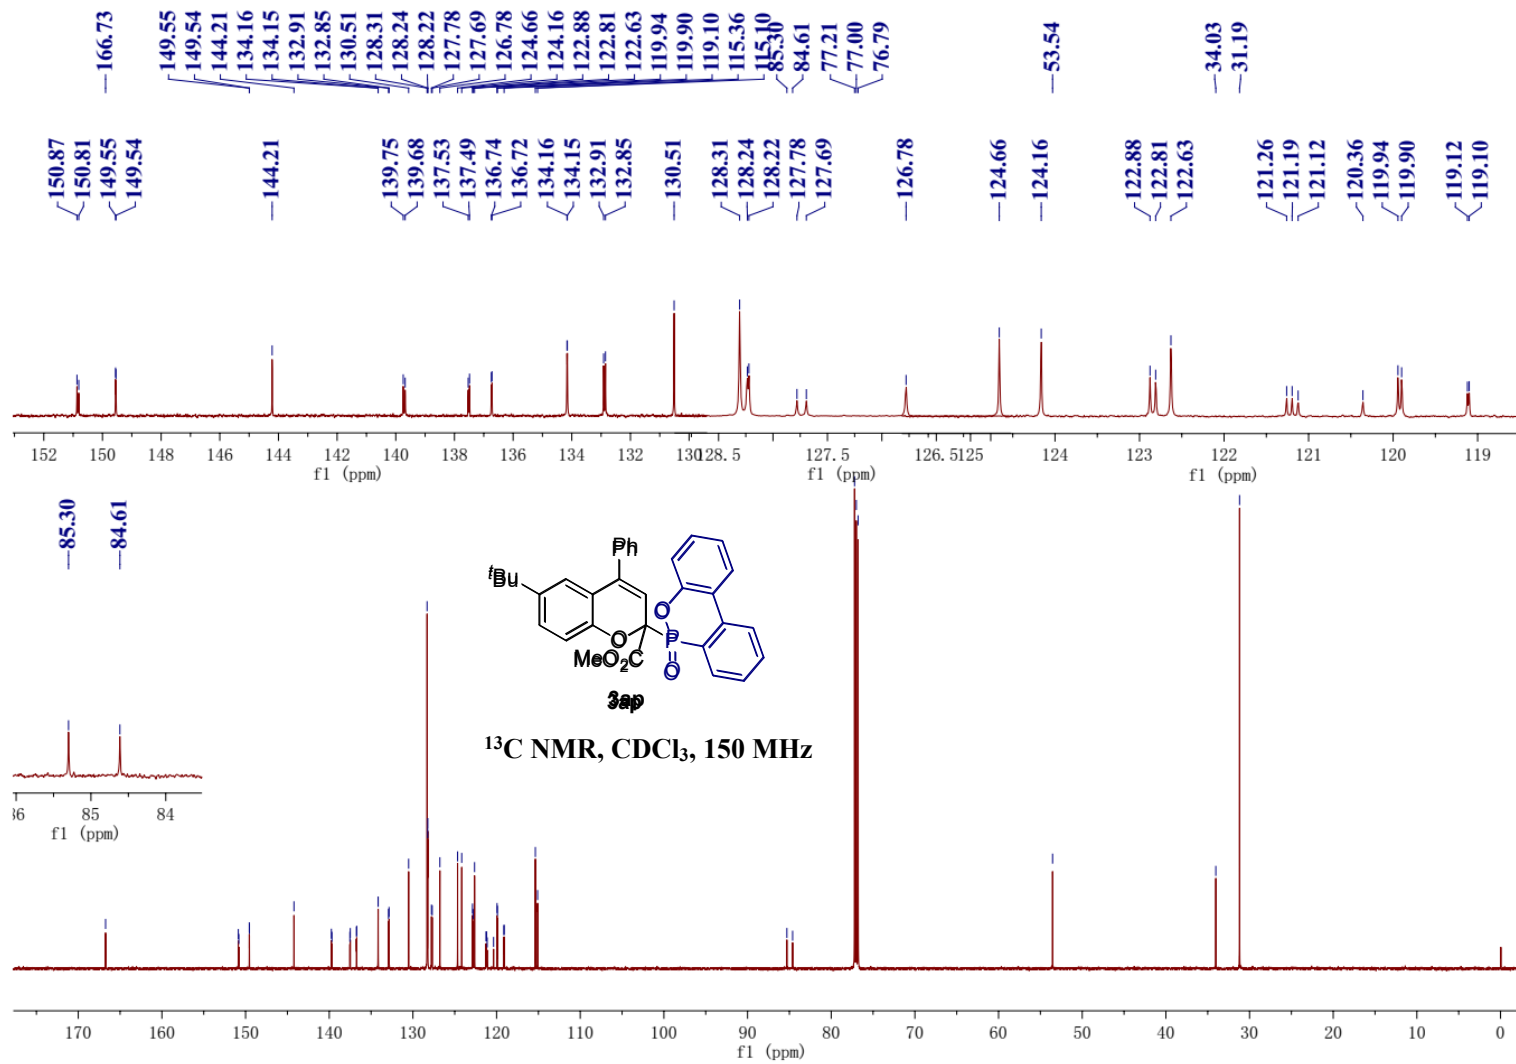

—24.39

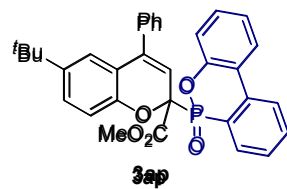

<sup>31</sup>P NMR, CDCl<sub>3</sub>, 243 MHz

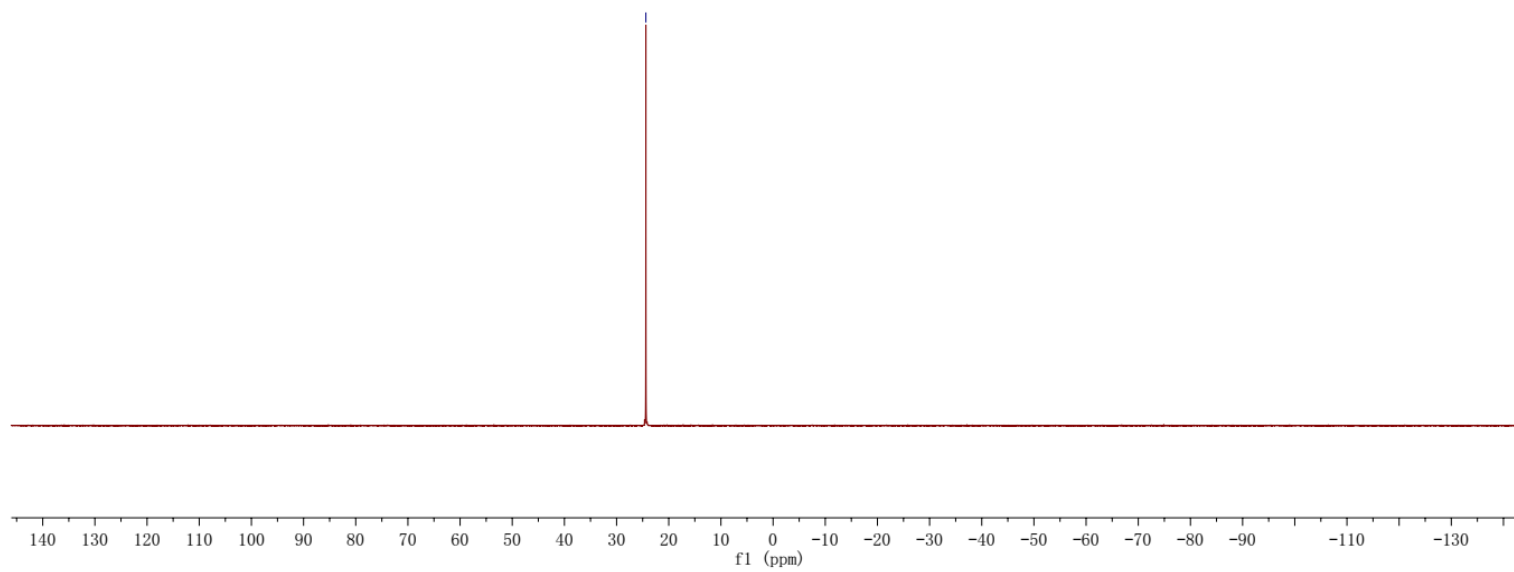

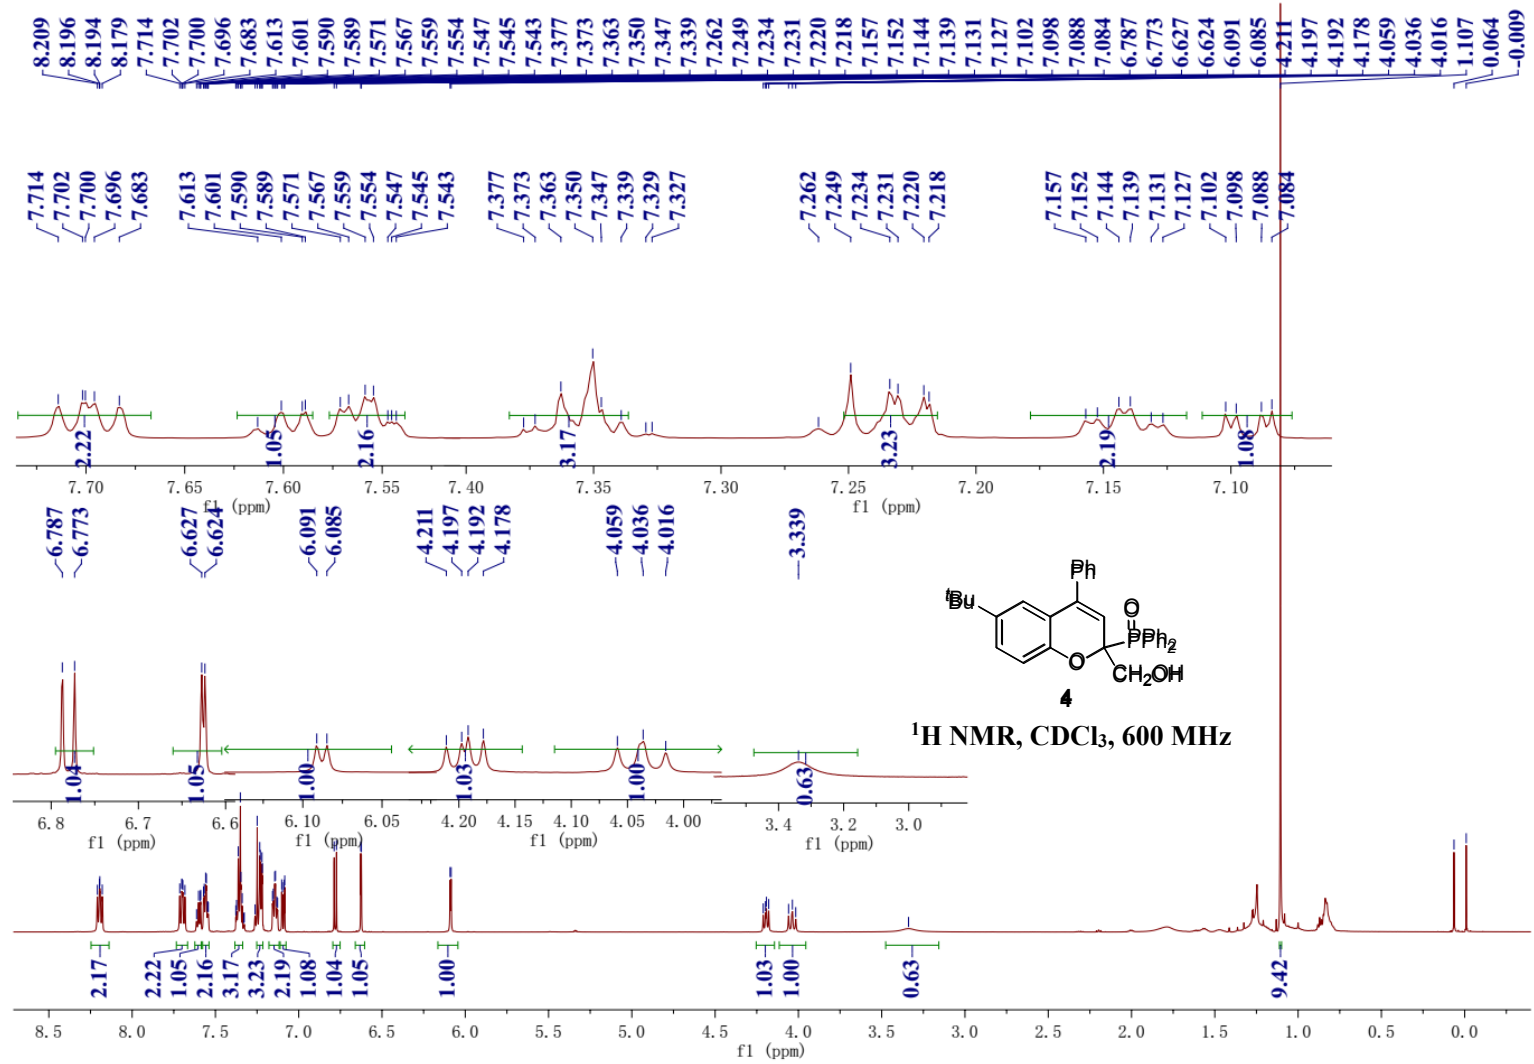

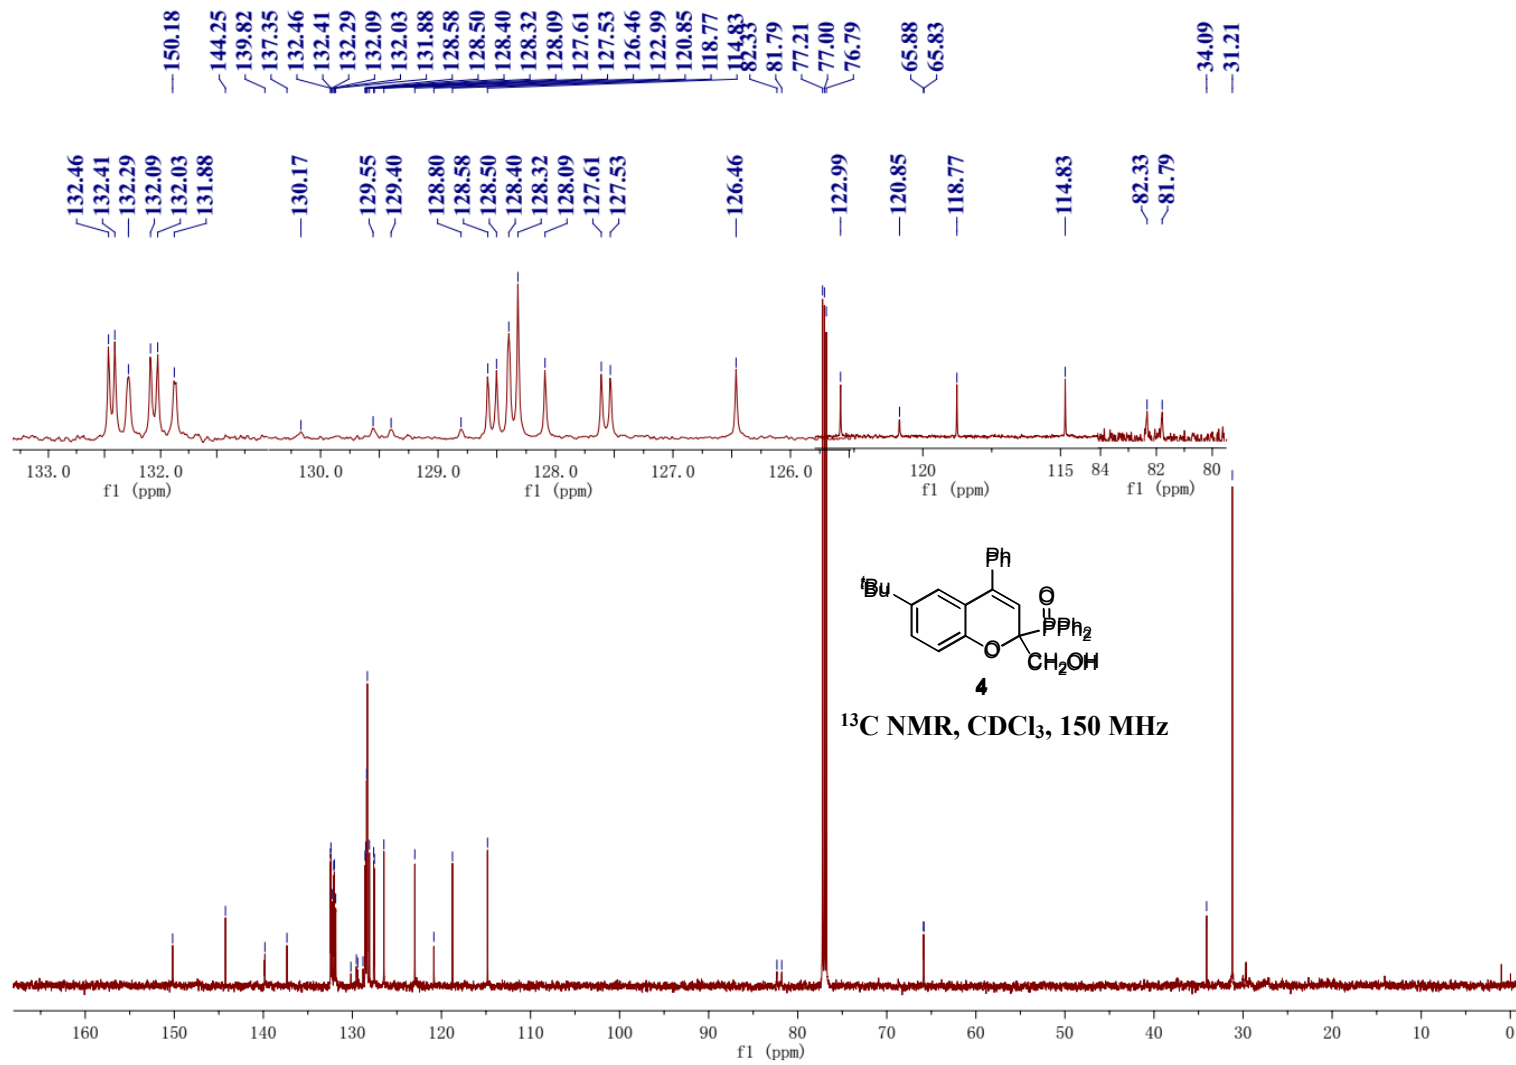

— 30.96

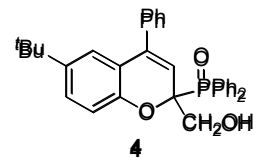

<sup>31</sup>P NMR, CDCl<sub>3</sub>, 243 MHz

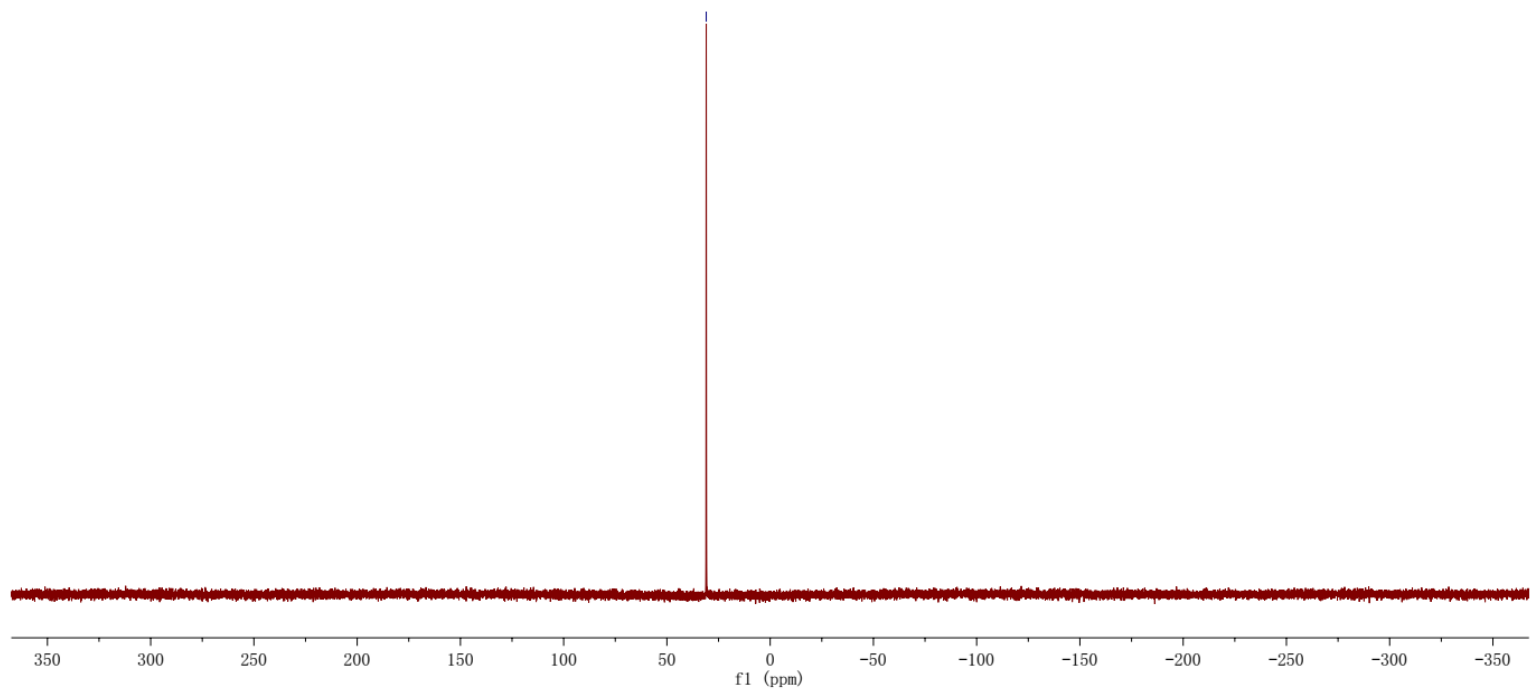

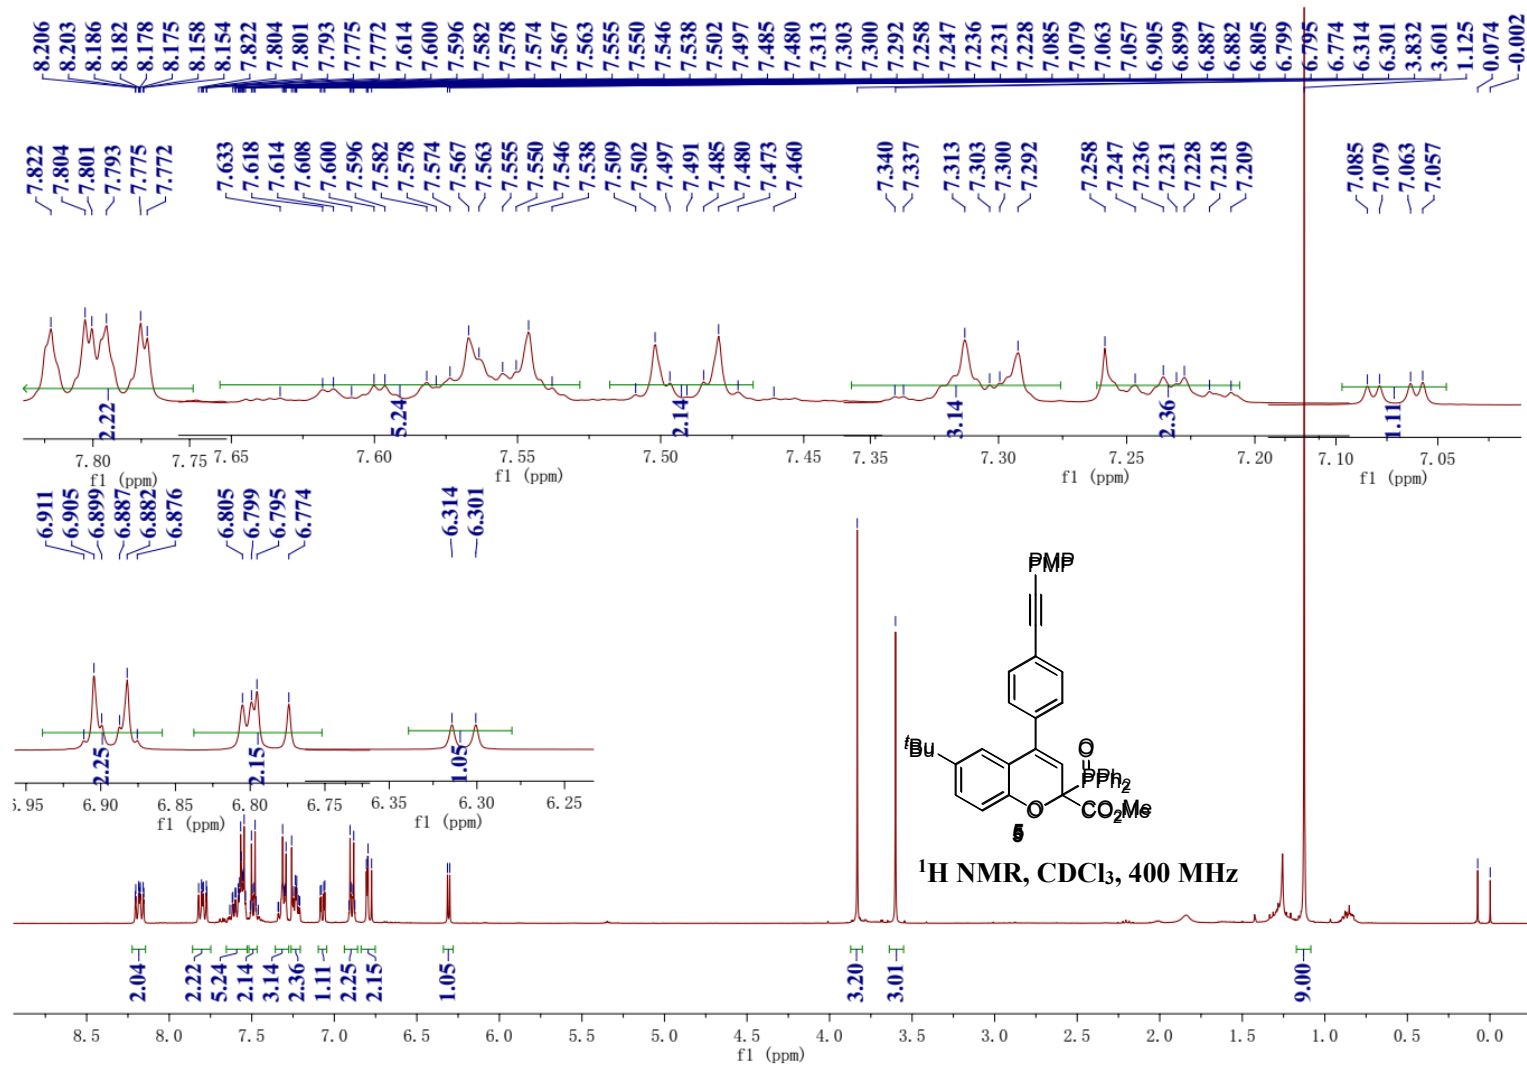

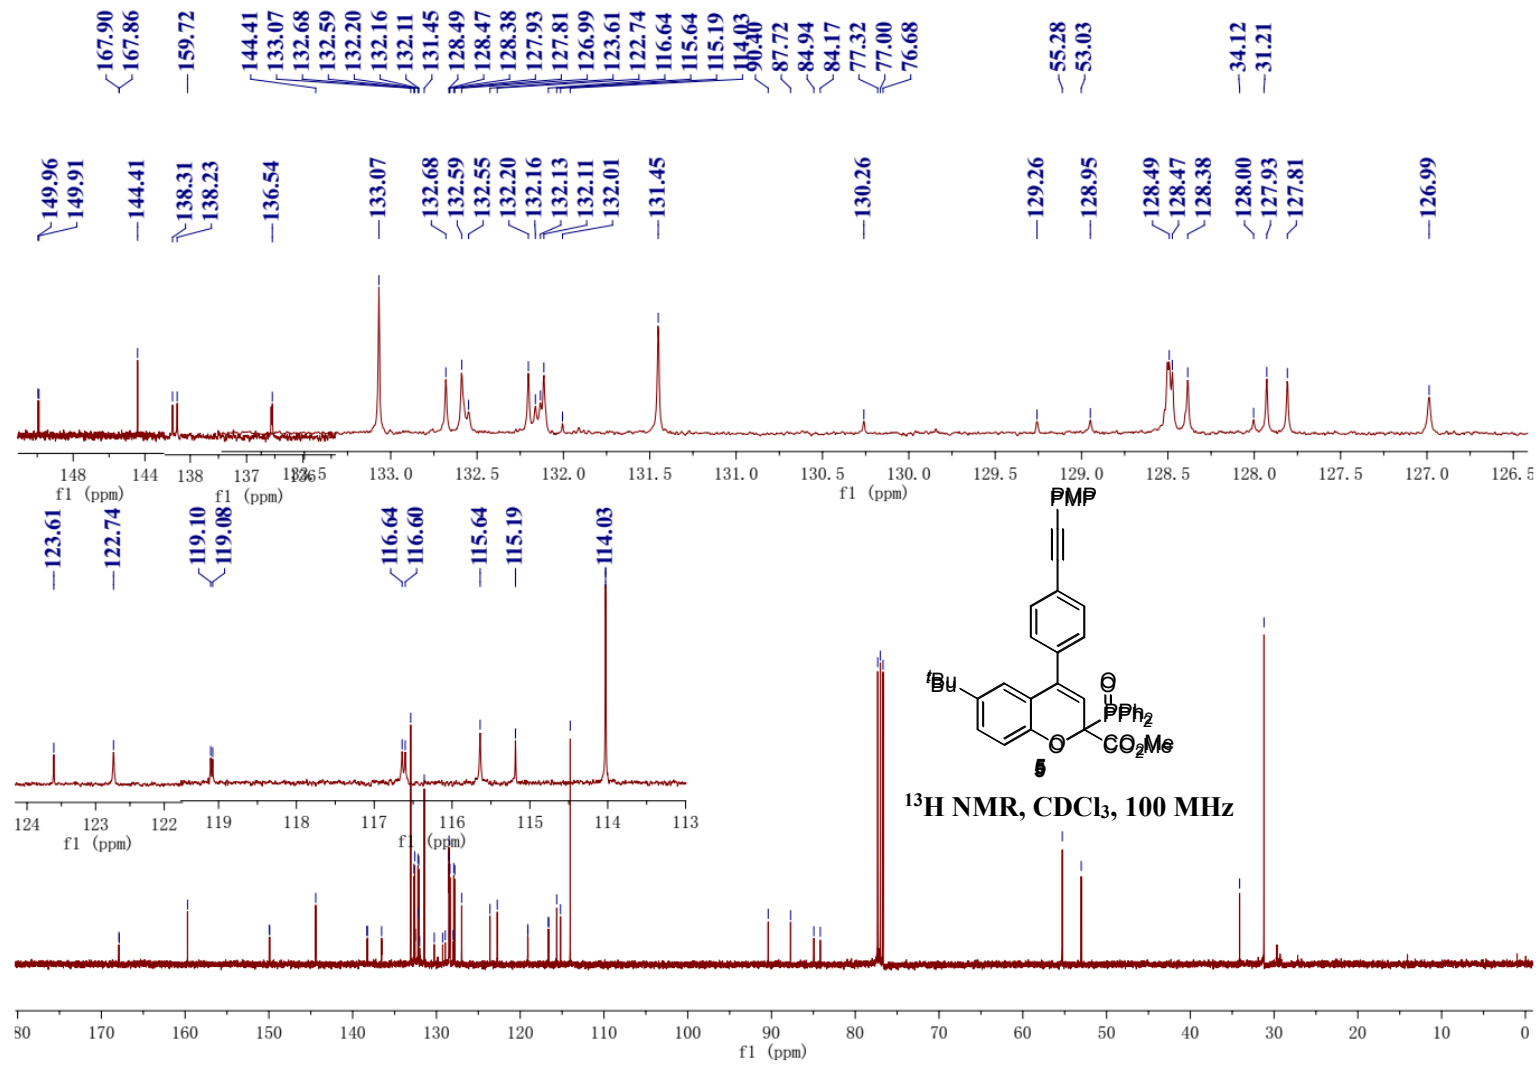



—28.14

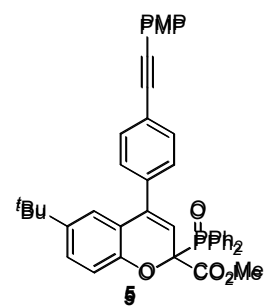

<sup>31</sup>P NMR, CDCl<sub>3</sub>, 162 MHz

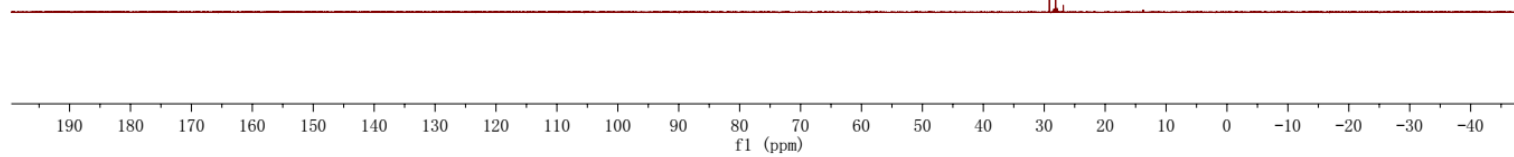

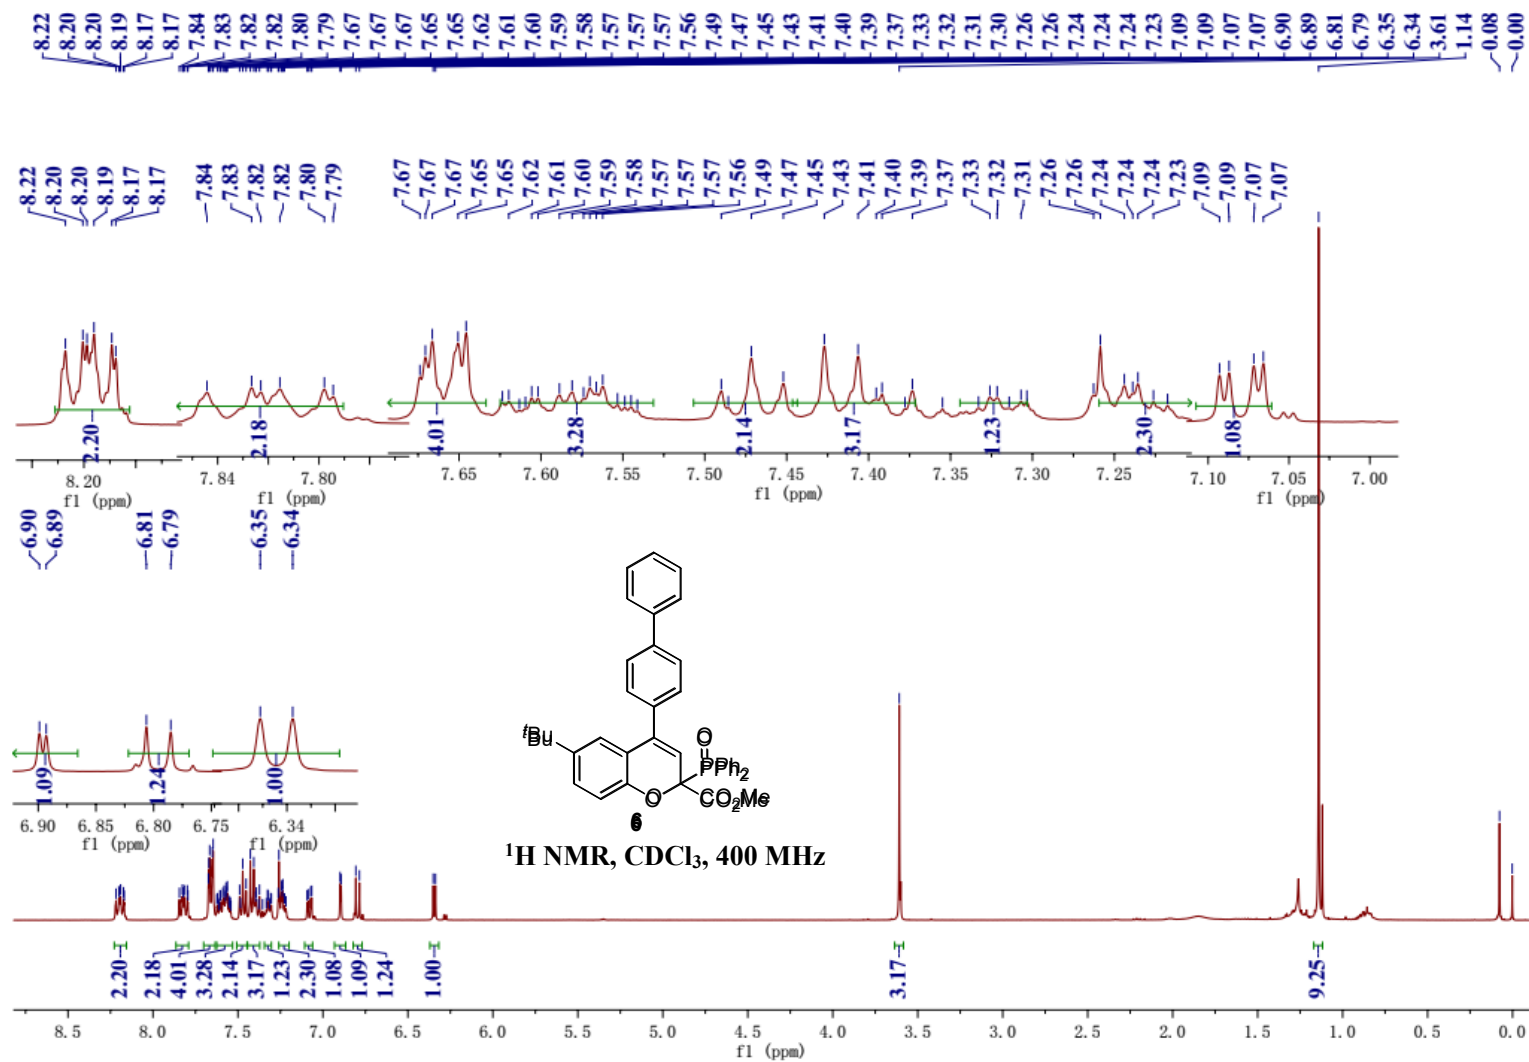

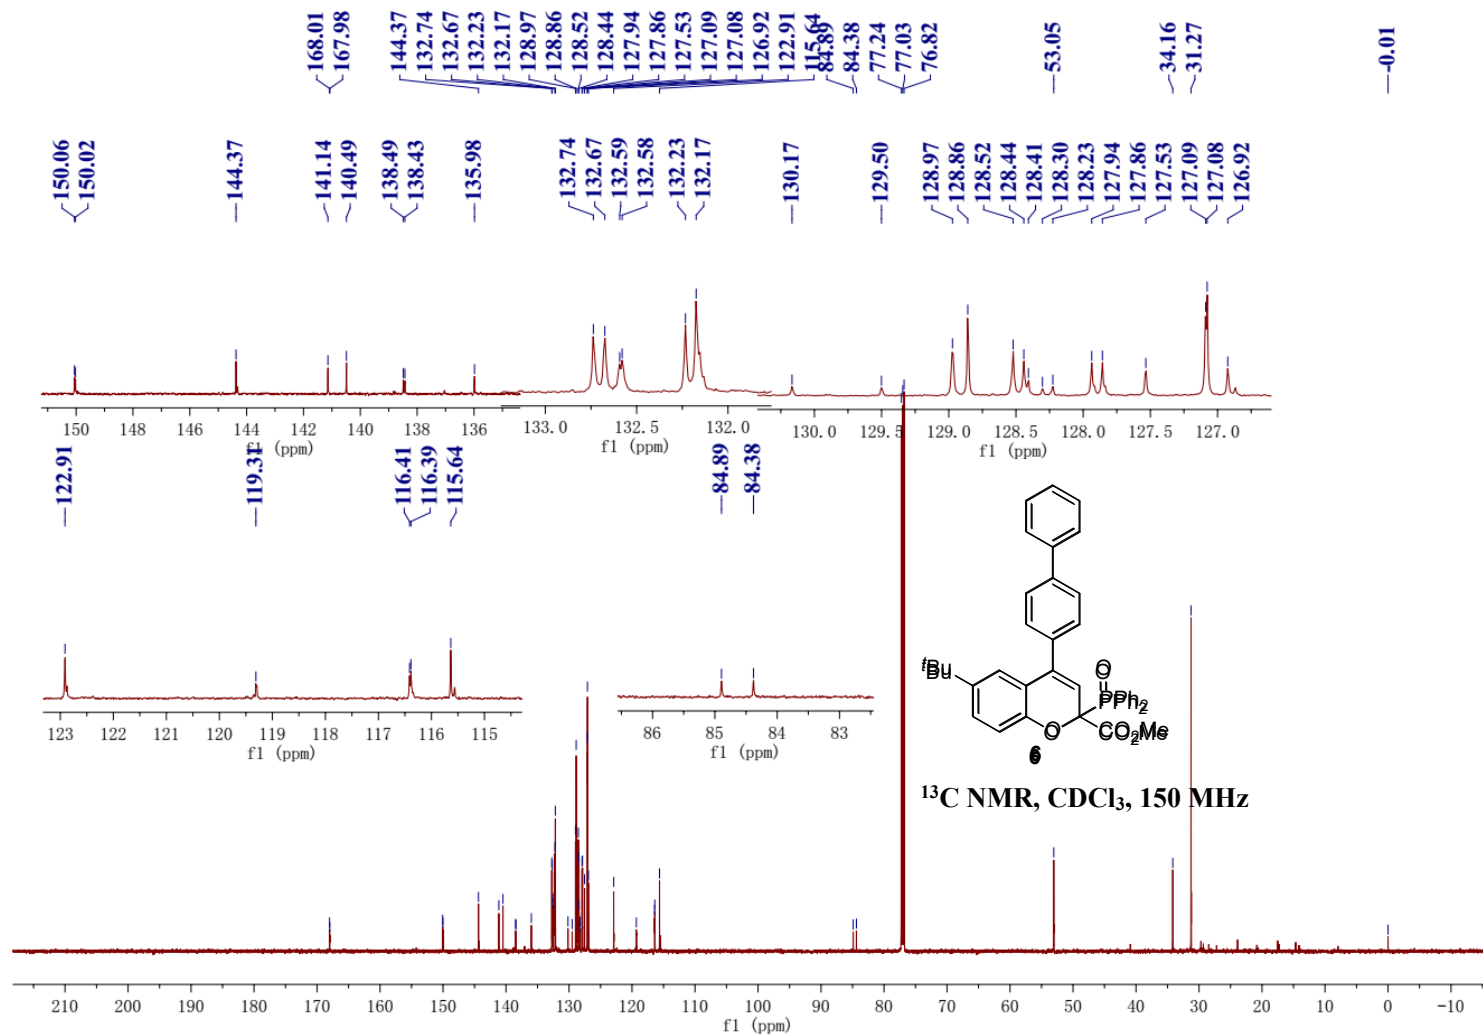

-28.07

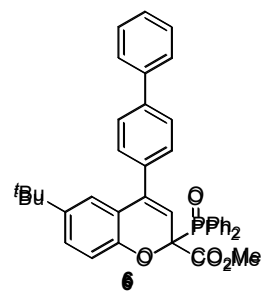

<sup>31</sup>P NMR, CDCl<sub>3</sub>, 243 MHz

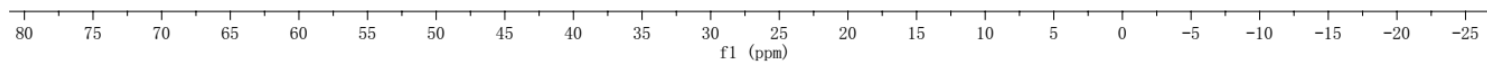

Supplement: d1ob01221e1.pdf [file d1ob01221e1.pdf]
